# Supplementary material for: Temporal trends and geographical disparities in comprehensive stroke centre capabilities in Japan from 2010 to 2018
Source: PubMed Central journal article supplement — BMJ Open. 2020 Aug 6;10(8):e033055. doi: 10.1136/bmjopen-2019-033055 (PMC7412582; doi:10.1136/bmjopen-2019-033055), 2020-08-06
Supplement: bmjopen-2019-033055.draft_revisions.pdf [file bmjopen-2019-033055.draft_revisions.pdf]

# BMJ Open

BMJ Open is committed to open peer review. As part of this commitment we make the peer review history of every article we publish publicly available.

When an article is published we post the peer reviewers' comments and the authors' responses online. We also post the versions of the paper that were used during peer review. These are the versions that the peer review comments apply to.

The versions of the paper that follow are the versions that were submitted during the peer review process. They are not the versions of record or the final published versions. They should not be cited or distributed as the published version of this manuscript.

BMJ Open is an open access journal and the full, final, typeset and author-corrected version of record of the manuscript is available on our site with no access controls, subscription charges or pay-per-view fees (<http://bmjopen.bmj.com>).

If you have any questions on BMJ Open's open peer review process please email [info.bmjopen@bmj.com](mailto:info.bmjopen@bmj.com)

# BMJ Open

## Temporal trends and geographical disparities in comprehensive stroke center capabilities in Japan from 2010 to 2018

|                               |                                                                                                                                                                                                                                                                                                                                                                                                                                                                                                                                                                                                                                                                                                                                                                                                                                                                                                                                  |
|-------------------------------|----------------------------------------------------------------------------------------------------------------------------------------------------------------------------------------------------------------------------------------------------------------------------------------------------------------------------------------------------------------------------------------------------------------------------------------------------------------------------------------------------------------------------------------------------------------------------------------------------------------------------------------------------------------------------------------------------------------------------------------------------------------------------------------------------------------------------------------------------------------------------------------------------------------------------------|
| Journal:                      | <i>BMJ Open</i>                                                                                                                                                                                                                                                                                                                                                                                                                                                                                                                                                                                                                                                                                                                                                                                                                                                                                                                  |
| Manuscript ID                 | bmjopen-2019-033055                                                                                                                                                                                                                                                                                                                                                                                                                                                                                                                                                                                                                                                                                                                                                                                                                                                                                                              |
| Article Type:                 | Research                                                                                                                                                                                                                                                                                                                                                                                                                                                                                                                                                                                                                                                                                                                                                                                                                                                                                                                         |
| Date Submitted by the Author: | 22-Jul-2019                                                                                                                                                                                                                                                                                                                                                                                                                                                                                                                                                                                                                                                                                                                                                                                                                                                                                                                      |
| Complete List of Authors:     | KUROGI, AI; Graduate School of Medical Sciences, Kyushu University, neurosurgery<br>Nishimura, Ataru ; Graduate School of Medical Sciences, Kyushu University, neurosurgery<br>Nishimura, Kunihiro; National Cerebral and Cardiovascular Center, Cerebrovascular Medicine<br>Kada, Akiko ; National Hospital Organization Nagoya Medical Center, Department of Clinical Trials and Research<br>Onozuka, Daisuke ; Kyushu University,<br>Hagihara, Akihito; Kyusyu University Graduate School of Medicine, Department of Health Services Management and Policy<br>Ogasawara, Kuniaki; Iwate Medical University School of Medicine, Department of Neurosurgery<br>Shiokawa, Yoshiaki ; Kyorin University Hospital, Department of Neurosurgery<br>Kitazono, Takanari; Kyushu University,<br>Arimura, Koichi; Kyushu University, Neurosurgery<br>Iihara, Koji ; Graduate School of Medical Sciences, Kyushu University, neurosurgery |
| Keywords:                     | Stroke < NEUROLOGY, comprehensive stroke center, trends                                                                                                                                                                                                                                                                                                                                                                                                                                                                                                                                                                                                                                                                                                                                                                                                                                                                          |
|                               |                                                                                                                                                                                                                                                                                                                                                                                                                                                                                                                                                                                                                                                                                                                                                                                                                                                                                                                                  |

SCHOLARONE™  
Manuscripts

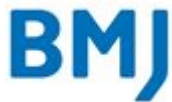

I, the Submitting Author has the right to grant and does grant on behalf of all authors of the Work (as defined in the below author licence), an exclusive licence and/or a non-exclusive licence for contributions from authors who are: i) UK Crown employees; ii) where BMJ has agreed a CC-BY licence shall apply, and/or iii) in accordance with the terms applicable for US Federal Government officers or employees acting as part of their official duties; on a worldwide, perpetual, irrevocable, royalty-free basis to BMJ Publishing Group Ltd ("BMJ") its licensees and where the relevant Journal is co-owned by BMJ to the co-owners of the Journal, to publish the Work in this journal and any other BMJ products and to exploit all rights, as set out in our [licence](#).

The Submitting Author accepts and understands that any supply made under these terms is made by BMJ to the Submitting Author unless you are acting as an employee on behalf of your employer or a postgraduate student of an affiliated institution which is paying any applicable article publishing charge ("APC") for Open Access articles. Where the Submitting Author wishes to make the Work available on an Open Access basis (and intends to pay the relevant APC), the terms of reuse of such Open Access shall be governed by a Creative Commons licence – details of these licences and which [Creative Commons](#) licence will apply to this Work are set out in our licence referred to above.

Other than as permitted in any relevant BMJ Author's Self Archiving Policies, I confirm this Work has not been accepted for publication elsewhere, is not being considered for publication elsewhere and does not duplicate material already published. I confirm all authors consent to publication of this Work and authorise the granting of this licence.

1  
2  
3  
4  
5 Temporal trends and geographical disparities in comprehensive stroke center  
6 capabilities in Japan from 2010 to 2018  
7  
8  
9

10  
11  
12 Ai Kurogi<sup>1</sup>, Ataru Nishimura<sup>1</sup>, Kunihiro Nishimura<sup>2</sup>, Akiko Kada<sup>3</sup>, Daisuke Onozuka<sup>2</sup>,  
13  
14 Akihito Hagihara<sup>2</sup>, Kuniaki Ogasawara<sup>4</sup>, Yoshiaki Shiokawa<sup>5</sup>, Takanari Kitazono<sup>2</sup>,  
15  
16 Koichi Arimura<sup>1</sup>, and Koji Iihara<sup>1</sup>, on behalf of the J-ASPECT Study Collaborators  
17  
18  
19

20  
21  
22 <sup>1</sup>Department of Neurosurgery, and <sup>6</sup>Department of Medicine and Clinical Science,  
23  
24 Graduate School of Medical Sciences, Kyushu University, Fukuoka, Japan  
25

26  
27 <sup>2</sup>Department of Preventive Medicine and Epidemiology, National Cerebral and  
28  
29 Cardiovascular Center, Suita, Japan  
30

31  
32 <sup>3</sup>Department of Clinical Research Management, Clinical Research Center, National  
33  
34 Hospital Organization Nagoya Medical Center, Nagoya, Japan  
35

36  
37 <sup>4</sup>Department of Neurosurgery, Iwate Medical University, Morioka, Japan  
38

39  
40 <sup>5</sup>Department of Neurosurgery, Kyorin University, Mitaka, Japan  
41  
42  
43  
44

45  
46 **Correspondence to:** Koji Iihara; [kiihara@ns.med.kyushu-u.go.jp](mailto:kiihara@ns.med.kyushu-u.go.jp)

47  
48 **Keywords:** stroke, comprehensive stroke center, care quality

49  
50 **Word count:** 1764  
51  
52  
53  
54  
55  
56  
57  
58  
59  
60

## ABSTRACT

Objectives: Comprehensive stroke center (CSC) capabilities are associated with reduced in-hospital mortality due to acute stroke. However, it remains unclear whether there are improving trends in the CSC capabilities, or how hospital-related factors determine quality improvement. This study examined whether CSC capabilities changed in Japan between 2010 and 2018, and whether any changes were influenced by hospital characteristics.

Design: A hospital-based cross-sectional study.

Setting: We sent out questionnaires to the training institutions of the Japan Neurosurgical Society and Japan Stroke Society in 2010, 2014 and 2018.

Participants: 749 in 2010, 532 in 2014 and 786 in 2018 hospitals that participate in the J-ASPECT Study.

Main outcome measures: CSC capabilities were assessed using the validated scoring system (CSC score:1-25 points) in 2010, 2014, and 2018 survey. The effect of hospital characteristics was examined using multiple logistic regression analysis.

Results: Among the 323 hospitals that responded to all surveys, the implementation of 14 recommended items increased. The CSC score (median, interquartile range) was 16 (13-19), 18 (14-20), 19 (15-21), for 2010, 2014, and 2018, respectively ( $p$  for trend < 0.001). There was a  $\geq 20\%$  increase in six items (e.g. endovascular physicians, stroke unit, and interventional coverage 24/7), and a  $\leq 20\%$  decrease in community education.

A lower baseline CSC score (odds ratio 0.82, [95% confidence interval] 0.75-0.9), the

1  
2  
3  
4  
5  
6  
7  
8  
9  
10  
11  
12  
13  
14  
15  
16  
17  
18  
19  
20  
21  
22  
23  
24  
25  
26  
27  
28  
29  
30  
31  
32  
33  
34  
35  
36  
37  
38  
39  
40  
41  
42  
43  
44  
45  
46  
47  
48  
49  
50  
51  
52  
53  
54  
55  
56  
57  
58  
59  
60

number of beds  $\geq 500$  (3.9 [1.2–13.0]), and the number of stroke physicians (7-9) (2.6 [1.1-6.3]) was associated with improved CSC capabilities, independent of geographical location.

Conclusions: There was a significant improvement in CSC capabilities between 2010 and 2018, which was mainly related to the availability of endovascular treatment and multidisciplinary care. Hospital characteristics may be considered to further improve systems of stroke care in light of a limited medical resources in a defined area.

Strengths and limitations of this study:

- A large-scale, representative hospitals of Japan provided data on temporal trends in the CSC capabilities for this cross-sectional study.
- Hospitals actively working to improve stroke care are more likely to respond to the questionnaire, which may lead to information bias.
- The CSC score was a significant composite measure to influence in-hospital mortality of acute stroke, but little information was established on the influence of specific items.

## INTRODUCTION

Stroke is the third leading cause of death and a leading cause of long-term disability in Japan. Primary and comprehensive stroke centers (CSCs) were developed to provide optimal implementation of intravenous recombinant tissue plasminogen activator (rt-PA) infusion and more intensive stroke care that includes endovascular and neurosurgical treatment.<sup>1, 2</sup> Organized care in a stroke unit is associated with better quality of care, and reduced death and dependency.<sup>3, 4</sup> Previous studies showed that patient outcomes associated with stroke and cardiovascular diseases are influenced by the hospital case volume,<sup>5, 6</sup> number of physicians, and geographical locations of the facility<sup>7</sup>. Progressive rural-urban disparities in acute stroke care has been reported in the United States,<sup>8</sup> but it is not known whether such disparity exists in other countries. In 2010, we launched the J-ASPECT Study, a nationwide survey of acute stroke care capacity for proper designation of a comprehensive stroke center in Japan.<sup>9, 10</sup> The J-ASPECT stroke database is a hospital-based, Japan-wide stroke registry. We demonstrated significant geographical differences in CSC capabilities in 2010,<sup>9</sup> and that CSC capabilities of a facility are associated with reduced in-hospital mortality from acute stroke.<sup>10</sup> Thus continuous monitoring of the CSC capabilities may be clinically meaningful to improve stroke outcomes.<sup>10, 11</sup> Since 2010, we have conducted nationwide benchmark analyses to allow participating hospitals to facilitate improvement of stroke care. However, it remains unclear whether there are improving trends in the CSC capabilities, or how hospital-related factors determine quality improvement.

## AIMS

1  
2  
3  
4  
5 We aimed to examine whether CSC capabilities in Japan changed from 2010 to 2018  
6  
7 and whether any recorded changes were influenced by hospital characteristics.  
8  
9

## 10 11 12 **METHODS**

### 13 14 15 **Institutional survey of CSC capabilities**

16  
17 The J-ASPECT Study was launched in collaboration with the Japan Neurosurgical  
18 Society and Japan Stroke Society, and participation was voluntary. In this study, we  
19 sent out questionnaires to the training institutions of both Societies in 2010, 2014 and  
20 2018 to assess CSC capabilities. The CSC capabilities of each facility were assessed  
21 with a validated scoring system (CSC score), using 25 items recommended by the Brain  
22 Attack Coalition. (2, 5-7)  
23  
24  
25  
26  
27  
28  
29

30 All items were classified into five categories: personnel, diagnostic, specific expertise,  
31 infrastructure, and education. A score of 1 was assigned for meeting each item, yielding  
32 a total CSC score of up to 25. Content, constructs, and predictive validity of this scoring  
33 system have been reported.<sup>10, 11</sup>  
34  
35  
36  
37  
38  
39  
40  
41

### 42 43 **Other hospital characteristics**

44  
45 Hospital characteristics including number of beds, annual stroke hospitalizations, stroke  
46 physicians, academic status, adoption of the Diagnosis Procedure Combination  
47 (DPC)-based payment system<sup>9</sup>, and geographic location were obtained from the 2010  
48 survey. The geographic location was classified according to urban employment areas  
49 (UEAs) divided into Metropolitan Employment Areas (MEAs) and Micropolitan  
50  
51  
52  
53  
54  
55  
56  
57  
58  
59  
60



1  
2  
3  
4  
5  
6  
7 Employment Areas (McEAs).<sup>9</sup> The MEAs were further classified into central and  
8  
9  
10 outlying areas based on the commuting pattern of their inhabitants.  
11  
12  
13

### 14 **Statistical analysis**

15  
16  
17  
18 To explore trends in CSC capabilities, we examined implementation of the 25 items and  
19  
20  
21 the CSC score in the 323 consecutively participating hospitals that responded to all  
22  
23  
24 surveys. To examine the influence of hospital-related factors on the change in CSC  
25  
26  
27 capabilities, we divided the hospitals into those with or without a temporal  
28  
29  
30 improvement of CSC score ( $\geq 1$  point increase between 2010 and 2018). Hospital  
31  
32  
33 characteristics were compared between the two groups with means or medians for  
34  
35  
36 continuous variables and proportions for categorical variables, using Chi-square tests  
37  
38  
39 for categorical variables and a Student's t-test for continuous variables.  
40  
41  
42

43 To explore the influence of hospital-related factors on temporal improvement of CSC  
44  
45  
46 capabilities, multiple logistic regression models were used. To assess selection bias, we  
47  
48  
49 compared hospital characteristics between consecutively participating hospitals with the  
50  
51  
52 others. All analyses were performed using the JMP Statistical Version 12 Software  
53  
54  
55 (SAS Institute Inc., Cary, NC, USA). P values of  $< 0.05$  were considered statistically  
56  
57  
58  
59  
60 significant.

### **Ethics approval**

The study was approved by the Kyushu University Institutional Review Board, which waived the requirement for individual informed consent.

## **RESULTS**

### **Trends in the CSC capabilities from 2010 to 2018**

A total of 749, 532 and 786 hospitals responded to the survey in 2010, 2014, and 2018, respectively. The implementation rates of each item are shown in Table 1a. The median (interquartile range) of the CSC scores was 14 (11-18), 17 (13-19), and 17 (12-20.3), for each year, respectively (Table 1a).

Among consecutively participating hospitals, there was an increase in implementation rates of the 14 items, and the CSC scores were (median, interquartile range): 16 (13-19), 18 (14-20), 19 (15-21), for 2010, 2014, and 2018, respectively ( $p$  for trend $<0.001$ ) (Table 1b). A marked increase ( $\geq 20\%$ ) was noted in six items related to endovascular treatment (endovascular physicians and interventional coverage 24/7) and multidisciplinary care (stroke unit, specialists of emergency medicine and physical medicine/rehabilitation, and stroke rehabilitation nurses).

In addition, a moderate increase ( $\leq 20\%$ ) was noted in eight items: 24/7 availability of diffusion-weighted magnetic resonance imaging, digital and CT angiography, carotid

1  
2  
3  
4  
5  
6  
7 ultrasound, coiling of an intracranial aneurysm, and implementation of stroke registry.  
8  
9

10 In contrast, there was a marked decrease ( $\leq 20\%$ ) in community education.  
11  
12  
13

### 14 **Geographical differences in CSC capabilities between 2010 and 2018**

15  
16 Among the seven items with significant geographical differences in 2010, all items in  
17 the personal component still showed a gap, despite overall improvement at all locations  
18 in 2018 (Table 2). In contrast, geographical differences in all infrastructure items  
19 diminished with overall improvement and a marked improvement in the McEA in 2018.  
20  
21  
22  
23  
24

25  
26 Over the study period, geographical differences emerged in intra-arterial reperfusion  
27 therapy and the number of specialists in physical medicine/rehabilitation. The remaining  
28 item, coiling of intracranial aneurysms, showed no changes.  
29  
30  
31  
32  
33  
34

### 35 **Influence of hospital characteristics on change in CSC capabilities**

36  
37 Among consecutively participating hospitals, 23 were excluded due to missing data.  
38  
39 Temporal improvement of CSC capabilities between 2010 and 2018 was noted in 198  
40 hospitals (66.0%). As for hospital characteristics, there were significant differences in  
41 bed number ( $p=0.016$ ) and CSC score in 2010 ( $p=0.032$ ) between the two groups on  
42 univariable analysis (Table 3).  
43  
44  
45  
46  
47  
48  
49

50 In the logistic regression analyses, the following variables had an association with  
51 temporal improvement of CSC capabilities (Table 4): a lower baseline CSC score (odds  
52 ratio 0.82 [95% Confidence Interval 0.75-0.9]), bed volume  $\geq 500$  (3.90, [1.17–13.0]),  
53  
54  
55  
56  
57  
58  
59  
60

1  
2  
3  
4  
5  
6 and moderate (7-9) number of stroke physicians (2.63, [1.10-6.27]). In contrast,  
7  
8  
9  
10 geographical location, academic status, DPC-based payment system, and case volume  
11  
12  
13 of stroke did not show a significant association.  
14  
15  
16

### 17 **Selection bias**

18  
19  
20 The response rates in 2010, 2014, and 2018 surveys were 55.0%, 39.7%, and 49.9%,  
21  
22 respectively. There were significant differences in the hospital characteristics between  
23  
24 hospitals that consecutively participated in all three surveys and the others  
25  
26 (supplementary table 1). Consecutively participating hospitals were more likely to be  
27  
28 MEA-central, academic, have a larger number of hospital beds, higher annual stroke  
29  
30 admission rate, and more stroke physicians.  
31  
32  
33  
34  
35

## 36 **DISCUSSION**

37  
38 We found an overall improvement in CSC capabilities between 2010 and 2018, and  
39  
40 different trends in geographical disparities based on the component of items. Hospitals  
41  
42 with a higher number of hospital beds, intermediate number of stroke physicians, and a  
43  
44 lower baseline CSC score had a higher likelihood of improving their CSC capabilities.  
45  
46  
47  
48  
49

### 50 **Temporal Changes to CSC capabilities**

51  
52 In addition to a significant increase in CSC capabilities, there was a marked increase in  
53  
54 implementation of the items, mainly related to endovascular treatment and  
55  
56 multidisciplinary care. Of note, we previously showed that interventional 24/7 coverage  
57  
58  
59  
60

1  
2  
3  
4  
5 and the presence of physical medicine/rehabilitation specialists were associated with  
6 reduced in-hospital mortality for those with subarachnoid hemorrhage, whereas  
7 availability of neurologists and stroke units were associated with reduced in-hospital  
8 mortality and better functional outcomes, respectively, for those with ischemic stroke.<sup>11</sup>  
9

10  
11  
12  
13  
14  
15 These findings are consistent with prior studies, which showed admission to a stroke  
16 unit with organized stroke care is associated with better quality of care and outcomes in  
17 those who experience an acute stroke.<sup>12 3</sup> The use of mechanical thrombectomy for  
18 large vessel acute ischemic stroke (AIS) has been rapidly increasing, but only 3.3% out  
19 of 15.1% potentially eligible AIS patients received it in 2016.<sup>13</sup> Improvement of CSC  
20 capabilities, especially related to endovascular treatment and multidisciplinary care  
21 should contribute to improved quality of care and outcomes in patients with acute  
22 stroke.  
23  
24  
25  
26  
27  
28  
29  
30  
31

32  
33 Decreased implementation of community education may be explained by limited  
34 availability of stroke physicians for this purpose due to increased burden of stroke care  
35 (e.g. emergent endovascular call).<sup>14</sup> Stroke educational campaigns have the potential to  
36 improve knowledge and awareness, but public campaigns are usually expensive and  
37 short-lived and may not achieve any significant improvement.<sup>15</sup>  
38  
39  
40  
41  
42  
43  
44  
45  
46

### 47 **Diminished and emerging geographical disparity**

48  
49 Determining rural/urban differences in CSC capabilities may help in the development  
50 of targeted interventions to improve stroke care and outcomes in rural areas. We found  
51 different trends in implementation of the items between personnel and infrastructure  
52 components. Rural areas are associated with reduced access to optimal stroke care and a  
53 lower use of acute stroke intervention.<sup>16</sup> Diminished disparities of implementation of  
54  
55  
56  
57  
58  
59  
60

1  
2  
3  
4  
5 stroke units in this study might result in a higher use of rt-PA infusion in rural areas.<sup>17</sup>  
6  
7

8 Emerging disparities in implementation of intraarterial reperfusion therapy deserves  
9 some attention. Since the evidence regarding acute endovascular reperfusion therapy  
10 efficacy was established in 2015,<sup>18</sup> relocation of relevant specialists might have  
11 occurred from rural to urban areas to meet urgent needs for more widespread use. In  
12 addition, a high prevalence of neurointerventional physician burnout may require  
13 centralization of acute endovascular reperfusion treatment.<sup>19</sup>  
14  
15  
16  
17  
18  
19  
20  
21  
22  
23

### 24 **Influence of hospital-related factors on improvement of CSC capabilities**

25  
26 Our study showed the impact of specific hospital-related factors on improvement of  
27 CSC capabilities, which may be useful to determine which hospitals to target to  
28 improve CSC capabilities in what regions. In rural areas, where medical resources are  
29 limited, centralization of acute stroke care in large hospitals may be needed. It is unclear  
30 why the highest quartile of physician volumes was not a significant factor for  
31 improvement of CSC capabilities; however, the answer may lie in the presence of a  
32 ceiling effect for further improvement.  
33  
34  
35  
36  
37  
38  
39  
40  
41  
42  
43  
44

### 45 **Limitations**

46  
47 There are several limitations to this study. First, this study may have included biased  
48 information. Hospitals actively working to improve stroke care are more likely to  
49 respond to the questionnaire. Second, the CSC score was a significant composite  
50 measure to influence in-hospital mortality of acute stroke, but little information was  
51 established on the influence of specific items. Third, we did not determine the influence  
52 of unmeasured confounders. Further research is required to examine the influence of  
53  
54  
55  
56  
57  
58  
59  
60

1  
2  
3  
4  
5 CSC capability improvement on outcomes of patients who experience ischemic and  
6  
7 hemorrhagic stroke.  
8  
9

## 10 11 12 **Conclusions**

13  
14 The CSC capabilities in Japan improved between 2010 and 2018, especially related to  
15  
16 endovascular treatment and multidisciplinary care. Hospital characteristics may be  
17  
18 considered to further improve systems of stroke care in light of limited medical  
19  
20 resources in a defined area.  
21  
22  
23  
24  
25  
26  
27

## 28 **Patient consent for publication**

29  
30 Not required  
31  
32

## 33 **Data availability statement**

34  
35 We have documented the data, methods, and materials used to conduct the  
36  
37 research in this report. The individual patient data are not publicly available  
38  
39 because of the memorandum signed by the director of the participating  
40  
41 hospitals and the principal investigator of the J-ASPECT Study group.  
42  
43  
44

## 45 **Authors and contributors**

46  
47 A Kurogi and KI drafted the manuscript. AN, KN, A Kada, DO, AH and KI were  
48  
49 involved in study concept, design and obtaining funding. A Kada , DO, AH, KO, YS,  
50  
51 TK, KA and KI were involved in analysis and of data. KO, YS, TK and KI were  
52  
53 involved in acquisition of data. All authors reviewed the study report, made comments  
54  
55 or suggestions on the manuscript drafts, and approved the final version.  
56  
57  
58  
59  
60

## Acknowledgments

We thank the Japan Neurosurgical Society and the Japan Stroke Society for their Collaboration.

## Declaration of Conflicting Interests

The Authors declare that there is no conflict of interest related to the submitted work.

## Funding

The Grants-in-Aid from the Japanese Ministry of Health, Labour and Welfare and a KAKENHI grant (18H02914) from the Japan Society for the Promotion of Science.

## References

1. Alberts MJ, Hademenos G, Latchaw RE, et al. Recommendations for the establishment of primary stroke centers. Brain Attack Coalition. *JAMA* 2000;283:3102-9.
2. Alberts MJ, Latchaw RE, Selman WR, et al. Recommendations for Comprehensive Stroke Centers: A Consensus Statement From the Brain Attack Coalition. *Stroke* 2005;36:1597-616.
3. Collaboration SUT. Organised inpatient (stroke unit) care for stroke. Cochrane Database of Systematic Reviews 2013;Sep 11;(9):CD000197.
4. Bray BD, Ayis S, Campbell J, et al. Associations between the organisation of



1  
2  
3  
4  
5  
6 stroke services, process of care, and mortality in England: prospective cohort study.

7  
8 *BMJ* 2013;346:f2827.

9  
10 5. Hall RE, Fang J, Hodwitz K, Saposnik G, Bayley MT. Does the Volume of  
11 Ischemic Stroke Admissions Relate to Clinical Outcomes in the Ontario Stroke System?

12  
13  
14 *Circ Cardiovasc Qual Outcomes* 2015;8(6 Suppl 3):S141-7.

15  
16 6. Ross JS, Normand SL, Wang Y, et al. Hospital volume and 30-day mortality  
17 for three common medical conditions. *N Engl J Med* 2010;362:1110-8.

18  
19 7. Howard G, Kleindorfer DO, Cushman M, et al. Contributors to the Excess  
20 Stroke Mortality in Rural Areas in the United States. *Stroke* 2017;48:1773-8.

21  
22 8. Gonzales S, Mullen MT, Skolarus L, Thibault DP, Udoeyo U, Willis AW.  
23 Progressive rural-urban disparity in acute stroke care. *Neurology* 2017;88:441-8.

24  
25 9. Iihara K, Nishimura K, Kada A, et al. The impact of comprehensive stroke  
26 care capacity on the hospital volume of stroke interventions: a nationwide study in  
27 Japan: J-ASPECT study. *J Stroke Cerebrovasc Dis* 2014;23:1001-18.

28  
29 10. Iihara K, Nishimura K, Kada A, et al. Effects of comprehensive stroke care  
30 capabilities on in-hospital mortality of patients with ischemic and hemorrhagic stroke:  
31 J-ASPECT study. *PLoS One* 2014;9:e96819.

32  
33 11. Kada A, Nishimura K, Nakagawara J, et al. Development and validation of a  
34 score for evaluating comprehensive stroke care capabilities: J-ASPECT Study. *BMC*  
35 *Neurol* 2017;17:46.

36  
37 12. Svendsen ML, Ehlers LH, Ingeman A, Johnsen SP. Higher stroke unit volume  
38 associated with improved quality of early stroke care and reduced length of stay. *Stroke*  
39 2012;43:3041-5.

40  
41 13. Smith EE, Saver JL, Cox M, et al. Increase in Endovascular Therapy in Get  
42  
43  
44  
45  
46  
47  
48  
49  
50  
51  
52  
53  
54  
55  
56  
57  
58  
59  
60

1  
2  
3  
4  
5 With The Guidelines-Stroke After the Publication of Pivotal Trials. *Circulation*  
6 2017;136:2303-10.  
7

8  
9  
10 14. Williams MM, Wilson TA, Leslie-Mazwi T, et al. The burden of  
11 neurothrombectomy call: a multicenter prospective study. *J Neurointerv Surg* 2018.  
12

13  
14 15. Rasura M, Baldereschi M, Di Carlo A, et al. Effectiveness of public stroke  
15 educational interventions: a review. *Eur J Neurol* 2014;21:11-20.  
16

17  
18 19. Kapral MK, Austin PC, Jeyakumar G, et al. Rural-Urban Differences in  
19 Stroke Risk Factors, Incidence, and Mortality in People With and Without Prior Stroke.  
20  
21  
22  
23  
24 *Circ Cardiovasc Qual Outcomes* 2019;12:e004973.  
25

26  
27 17. Domino JS, Baek J, Meurer WJ, et al. Emerging temporal trends in tissue  
28 plasminogen activator use: Results from the BASIC project. *Neurology*  
29 2016;87:2184-91.  
30  
31

32  
33 18. Goyal M, Menon BK, van Zwam WH, et al. Endovascular thrombectomy  
34 after large-vessel ischaemic stroke: a meta-analysis of individual patient data from five  
35 randomised trials. *The Lancet* 2016;387:1723-31.  
36  
37  
38

39  
40 19. Fargen KM, Arthur AS, Leslie-Mazwi T, et al. A survey of burnout and  
41 professional satisfaction among United States neurointerventionalists. *J Neurointerv*  
42  
43  
44  
45 *Surg* 2019.  
46  
47  
48  
49  
50  
51  
52  
53  
54  
55  
56  
57  
58  
59  
60

Table 1.

| (a)        |                                         | (b)                         |              |              |                                       |              |              |         |
|------------|-----------------------------------------|-----------------------------|--------------|--------------|---------------------------------------|--------------|--------------|---------|
| Components | Items                                   | All participating hospitals |              |              | Consecutively participating hospitals |              |              |         |
|            |                                         | 2010 (n=749)                | 2014 (n=532) | 2018 (n=786) | 2010 (n=323)                          | 2014 (n=323) | 2018 (n=323) | P value |
| Personnel  | Neurologists                            | 358 (47.8)                  | 283 (53.2)   | 452 (57.5)   | 176 (54.5)                            | 177 (54.8)   | 210 (65.0)   | 0.009   |
|            | Neurosurgeons                           | 694 (92.7)                  | 515 (96.8)   | 754 (95.9)   | 314 (97.2)                            | 317 (98.1)   | 317 (98.1)   | 0.645   |
|            | Endovascular<br>physicians              | 272 (36.3)                  | 280 (52.6)   | 428 (54.4)   | 146 (45.2)                            | 196 (60.7)   | 211 (65.3)   | <0.001  |
|            | Emergency<br>medicine                   | 162 (21.6)                  | 207 (38.9)   | 427 (54.3)   | 96 (29.7)                             | 146 (45.2)   | 205 (63.5)   | <0.001  |
|            | Physical medicine<br>and rehabilitation | 113 (15.1)                  | 143 (26.9)   | 313 (39.8)   | 61 (18.9)                             | 95 (29.4)    | 137 (42.4)   | <0.001  |
|            | Rehabilitation<br>therapy               | 742 (99.1)                  | 529 (99.4)   | 779 (99.1)   | 321 (99.4)                            | 321 (99.4)   | 321 (99.4)   | 1       |
|            | Stroke rehabilitation<br>nurses         | 102 (13.6)                  | 157 (29.5)   | 285 (36.2)   | 48 (14.9)                             | 116 (35.9)   | 146 (45.2)   | <0.001  |

|    |            |                      |             |            |            |            |            |            |        |
|----|------------|----------------------|-------------|------------|------------|------------|------------|------------|--------|
| 1  |            |                      |             |            |            |            |            |            |        |
| 2  |            |                      |             |            |            |            |            |            |        |
| 3  |            |                      |             |            |            |            |            |            |        |
| 4  | Diagnostic | CT                   | 742 (99.1)  | 527 (99.1) | 763 (97.1) | 322 (99.7) | 322 (99.7) | 322 (99.7) | 1      |
| 5  |            | MRI with diffusion   | 647 (86.4)  | 504 (94.7) | 732 (93.1) | 291 (90.1) | 311 (96.3) | 314 (97.2) | <0.001 |
| 6  |            | Digital cerebral     |             |            |            |            |            |            |        |
| 7  |            | angiography          | 602 (80.3)  | 476 (89.4) | 638 (81.2) | 288 (89.2) | 305 (94.4) | 299 (92.6) | 0.043  |
| 8  |            | CT angiography       | 627 (83.7)  | 492 (92.5) | 701 (89.2) | 289 (89.5) | 305 (94.4) | 309 (95.7) | 0.004  |
| 9  |            | Carotid duplex       |             |            |            |            |            |            |        |
| 10 |            | ultrasound           | 257 (34.3)  | 219 (41.2) | 343 (43.6) | 126 (39.0) | 153 (47.4) | 169 (52.3) | 0.003  |
| 11 |            | Transcranial Doppler |             |            |            |            |            |            |        |
| 12 |            | ultrasound           | 121 (16.2)  | 123 (23.1) | 162 (20.6) | 70 (21.7)  | 87 (26.9)  | 95 (29.4)  | 0.073  |
| 13 | Specific   | Carotid              |             |            |            |            |            |            |        |
| 14 | Expertise  | endarterectomy       | 603 (80.5)  | 458 (86.1) | 613 (78.0) | 292 (90.4) | 288 (89.2) | 284 (87.9) | 0.599  |
| 15 |            | Clipping of          |             |            |            |            |            |            |        |
| 16 |            | intracranial         | 685 (91.5)  | 504 (94.7) | 706 (89.8) | 314 (97.2) | 315 (97.5) | 314 (97.2) | 0.961  |
| 17 |            | aneurysm             |             |            |            |            |            |            |        |
| 18 |            | Hematoma             |             |            |            |            |            |            |        |
| 19 |            | removal/draining     | 689 (92.0)  | 505 (95.0) | 718 (91.3) | 315 (97.5) | 315 (97.5) | 314 (97.2) | 0.96   |
| 20 |            | Coiling of           | 3360 (48.1) | 332 (62.4) | 448 (57.0) | 192 (59.4) | 223 (69.0) | 223 (69.0) | 0.001  |

|                |                     |            |            |            |            |            |            |        |
|----------------|---------------------|------------|------------|------------|------------|------------|------------|--------|
|                | intracranial        |            |            |            |            |            |            |        |
|                | aneurysm            |            |            |            |            |            |            |        |
|                | Intra-arterial      |            |            |            |            |            |            |        |
|                | reperfusion therapy | 498 (66.5) | 398 (74.8) | 510 (64.9) | 245 (75.9) | 261 (80.8) | 247 (76.5) | 0.257  |
| Infrastructure | Stroke unit         | 132 (17.6) | 202 (38.0) | 342 (43.5) | 74 (22.9)  | 136 (42.1) | 171 (52.9) | <0.001 |
|                | Intensive care unit | 445 (59.4) | 362 (68.0) | 467 (59.4) | 214 (66.3) | 224 (69.4) | 220 (68.1) | 0.698  |
|                | Operating room      |            |            |            |            |            |            |        |
|                | staffed 24/7        | 451 (60.2) | 339 (63.7) | 487 (62.0) | 230 (71.2) | 239 (74.0) | 243 (75.2) | 0.495  |
|                | Interventional      |            |            |            |            |            |            |        |
|                | services coverage   | 279 (37.3) | 317 (59.6) | 452 (57.5) | 147 (45.5) | 218 (67.5) | 219 (67.8) | <0.001 |
|                | 24/7                |            |            |            |            |            |            |        |
|                | Stroke registry     | 235 (31.4) | 260 (48.9) | 349 (44.4) | 133 (41.2) | 172 (53.3) | 164 (50.8) | 0.005  |
| Education      | Community           |            |            |            |            |            |            |        |
|                | education           | 369 (49.3) | 144 (27.1) | 204 (26.0) | 188 (58.2) | 91 (28.2)  | 98 (30.3)  | <0.001 |
|                | Professional        |            |            |            |            |            |            |        |
|                | education           | 436 (58.2) | 326 (61.3) | 429 (54.6) | 207 (64.1) | 208 (64.4) | 184 (57.0) | 0.089  |
| <hr/>          |                     |            |            |            |            |            |            |        |
|                | Total CSC score     |            |            |            |            |            |            |        |

|    |               |             |             |               |             |             |             |        |
|----|---------------|-------------|-------------|---------------|-------------|-------------|-------------|--------|
| 1  |               |             |             |               |             |             |             |        |
| 2  |               |             |             |               |             |             |             |        |
| 3  |               |             |             |               |             |             |             |        |
| 4  |               |             |             |               |             |             |             |        |
| 5  | median, (IQR) | 14 (11, 18) | 17 (13, 19) | 17 (12, 20.3) | 16 (13, 19) | 18 (14, 20) | 19 (15, 21) | <0.001 |
| 6  | <hr/>         |             |             |               |             |             |             |        |
| 7  |               |             |             |               |             |             |             |        |
| 8  |               |             |             |               |             |             |             |        |
| 9  |               |             |             |               |             |             |             |        |
| 10 |               |             |             |               |             |             |             |        |
| 11 |               |             |             |               |             |             |             |        |
| 12 |               |             |             |               |             |             |             |        |
| 13 |               |             |             |               |             |             |             |        |
| 14 |               |             |             |               |             |             |             |        |
| 15 |               |             |             |               |             |             |             |        |
| 16 |               |             |             |               |             |             |             |        |
| 17 |               |             |             |               |             |             |             |        |
| 18 |               |             |             |               |             |             |             |        |
| 19 |               |             |             |               |             |             |             |        |
| 20 |               |             |             |               |             |             |             |        |
| 21 |               |             |             |               |             |             |             |        |
| 22 |               |             |             |               |             |             |             |        |
| 23 |               |             |             |               |             |             |             |        |
| 24 |               |             |             |               |             |             |             |        |
| 25 |               |             |             |               |             |             |             |        |
| 26 |               |             |             |               |             |             |             |        |
| 27 |               |             |             |               |             |             |             |        |
| 28 |               |             |             |               |             |             |             |        |
| 29 |               |             |             |               |             |             |             |        |
| 30 |               |             |             |               |             |             |             |        |
| 31 |               |             |             |               |             |             |             |        |
| 32 |               |             |             |               |             |             |             |        |
| 33 |               |             |             |               |             |             |             |        |
| 34 |               |             |             |               |             |             |             |        |
| 35 |               |             |             |               |             |             |             |        |
| 36 |               |             |             |               |             |             |             |        |
| 37 |               |             |             |               |             |             |             |        |
| 38 |               |             |             |               |             |             |             |        |
| 39 |               |             |             |               |             |             |             |        |
| 40 |               |             |             |               |             |             |             |        |
| 41 |               |             |             |               |             |             |             |        |
| 42 |               |             |             |               |             |             |             |        |
| 43 |               |             |             |               |             |             |             |        |
| 44 |               |             |             |               |             |             |             |        |
| 45 |               |             |             |               |             |             |             |        |
| 46 |               |             |             |               |             |             |             |        |

For peer review only

Table 2.

|           |                                            | a) 2010     |                    |           |         | b) 2018     |                    |           |
|-----------|--------------------------------------------|-------------|--------------------|-----------|---------|-------------|--------------------|-----------|
|           |                                            | MEA central | MEA                | McEA      | P value | MEA central | MEA                | McEA      |
|           |                                            | (n=186)     | outlying<br>(n=79) | (n=35)    |         | (n=186)     | outlying<br>(n=79) | (n=35)    |
| Personnel | Neurologists                               | 115 (61.8)  | 44 (55.7)          | 10 (28.6) | 0.001   | 133(71.5)   | 55(69.6)           | 14 (40.0) |
|           | Neurosurgeons                              | 181 (97.3)  | 77 (97.5)          | 34 (97.1) | 0.995   | 183 (98.4)  | 78 (98.7)          | 34 (97.1) |
|           | Endovascular<br>physicians                 | 101 (54.3)  | 31 (39.2)          | 8 (22.9)  | <0.001  | 136 (73.1)  | 49 (62.0)          | 14 (40.0) |
|           | Emergency<br>medicine                      | 57 (30.7)   | 25 (31.7)          | 7 (20.0)  | 0.406   | 122 (65.6)  | 54 (68.4)          | 16 (45.7) |
|           | Physical<br>medicine and<br>rehabilitation | 36 (19.4)   | 16 (20.3)          | 5 (14.3)  | 0.740   | 83 (44.6)   | 42 (53.2)          | 3 (8.6)   |
|           | Rehabilitation<br>therapy                  | 185 (99.5)  | 78 (98.7)          | 35 (100)  | 0.701   | 185 (99.5)  | 78 (98.7)          | 35 (100)  |
|           | Stroke                                     | 33 (17.8)   | 9 (11.4)           | 1 (2.9)   | 0.049   | 90 (48.4)   | 41 (51.9)          | 9 (25.7)  |

|  |                                         |            |            |            |       |            |           |           |
|--|-----------------------------------------|------------|------------|------------|-------|------------|-----------|-----------|
|  | rehabilitation<br>nurses                |            |            |            |       |            |           |           |
|  | CT                                      | 185 (99.5) | 79 (100.0) | 35 (100.0) | 0.735 | 185 (100)  | 79 (100)  | 35 (100)  |
|  | MRI with<br>diffusion                   | 167 (89.8) | 69 (87.3)  | 33 (94.3)  | 0.530 | 179 (96.2) | 78 (98.7) | 35 (100)  |
|  | Digital cerebral<br>angiography         | 165 (88.7) | 70 (88.6)  | 34 (97.1)  | 0.303 | 168 (90.3) | 76 (96.2) | 33 (94.3) |
|  | CT angiography                          | 163 (87.6) | 72 (91.1)  | 32 (91.4)  | 0.627 | 176 (94.6) | 77 (97.5) | 34 (97.1) |
|  | Carotid duplex<br>ultrasound            | 71 (38.1)  | 30 (38.0)  | 14 (40.0)  | 0.977 | 95 (51.1)  | 48 (60.8) | 15 (42.9) |
|  | TCD                                     | 43 (23.1)  | 18 (22.8)  | 3 (8.6)    | 0.146 | 54 (29.0)  | 29 (36.7) | 5 (14.3)  |
|  | Carotid<br>endarterectomy               | 173 (93.0) | 68 (86.1)  | 32 (91.4)  | 0.196 | 166 (89.3) | 71 (89.9) | 28 (80)   |
|  | Clipping of<br>intracranial<br>aneurysm | 183 (98.4) | 75 (94.9)  | 34 (97.1)  | 0.280 | 181 (97.3) | 77 (97.5) | 34 (97.1) |
|  | Hematoma<br>removal/draining            | 183 (98.4) | 76 (96.2)  | 34 (97.1)  | 0.546 | 182 (97.9) | 77 (97.5) | 35 (94.3) |



|                |                                       |            |           |           |        |            |           |           |
|----------------|---------------------------------------|------------|-----------|-----------|--------|------------|-----------|-----------|
|                | Coiling of intracranial aneurysm      | 119 (64.0) | 46 (58.2) | 13 (37.1) | 0.012  | 143 (76.9) | 49 (62.0) | 17 (48.6) |
|                | Intra-arterial reperfusion therapy    | 142 (76.3) | 58 (73.4) | 27 (77.1) | 0.859  | 153 (82.3) | 57 (72.2) | 22 (62.9) |
| Infrastructure | Stroke unit                           | 50 (26.9)  | 17 (21.5) | 2 (5.7)   | 0.023  | 106 (57.0) | 44 (55.7) | 13 (37.1) |
|                | Intensive care unit                   | 123 (66.1) | 54 (68.4) | 21 (60.0) | 0.685  | 134 (72.0) | 54 (68.4) | 18 (51.4) |
|                | Operating room staffed 24/7           | 143 (76.9) | 59 (74.7) | 15 (42.9) | <0.001 | 148 (79.6) | 56 (70.9) | 22 (62.9) |
|                | Interventional services coverage 24/7 | 103 (55.4) | 30 (38.0) | 6 (17.1)  | <0.001 | 133 (71.5) | 54 (68.4) | 18 (51.4) |
|                | Stroke registry                       | 81 (43.6)  | 31 (29.1) | 15 (42.9) | 0.808  | 93 (50.0)  | 47 (59.5) | 15 (42.9) |
| Education      | Community education                   | 110 (59.1) | 53 (67.1) | 17 (48.6) | 0.164  | 55 (29.6)  | 28 (35.4) | 8 (22.9)  |

|  |                        |            |           |           |       |            |           |           |
|--|------------------------|------------|-----------|-----------|-------|------------|-----------|-----------|
|  | Professional education | 125 (67.2) | 53 (67.1) | 17 (48.6) | 0.095 | 105 (56.5) | 47 (59.5) | 17 (48.6) |
|--|------------------------|------------|-----------|-----------|-------|------------|-----------|-----------|

\*MEA metropolitan, McEA  
microplitan

For peer review only

1  
2  
3  
4  
5  
6  
7  
8  
9  
10  
11  
12  
13  
14  
15  
16  
17  
18  
19  
20  
21  
22  
23  
24  
25  
26  
27  
28  
29  
30  
31  
32  
33  
34  
35  
36  
37  
38  
39  
40  
41  
42  
43  
44  
45  
46

Table 3.

| Hospital-related factors in All Hsps. |             | Improvement<br>Hsps.<br>(n=198) | No improvement<br>Hsps.<br>(n=102) | p value <sup>#</sup> |
|---------------------------------------|-------------|---------------------------------|------------------------------------|----------------------|
| 2010                                  | (n=300)     |                                 |                                    |                      |
| <hr/>                                 |             |                                 |                                    |                      |
| Hospital locations                    |             |                                 |                                    | 0.478                |
| MEA central                           | 186 (62.0)  | 121 (61.1)                      | 65 (63.7)                          |                      |
| MEA outlying                          | 79 (26.3)   | 56 (28.3)                       | 23 (22.6)                          |                      |
| McEA                                  | 35 (11.7)   | 21 (10.6)                       | 14 (13.7)                          |                      |
| CSC score in 2010                     |             |                                 |                                    |                      |
| median (IQR)                          | 16 (13, 19) | 16 (13, 18)                     | 17 (13, 20)                        | 0.032                |
| Academic hospital                     | 58 (19.3)   | 42 (21.2)                       | 16 (15.7)                          | 0.251                |
| DPC* hospital                         | 225 (75.0)  | 145 (73.2)                      | 80 (78.4)                          | 0.325                |
| Number of hospital beds               |             |                                 |                                    | 0.016                |

|                             |            |            |            |       |
|-----------------------------|------------|------------|------------|-------|
| 1-99                        | 17 (5.7)   | 9 (4.6)    | 8 (7.8)    |       |
| 100-299                     | 68 (22.7)  | 37 (18.7)  | 31 (30.4)  |       |
| 300-499                     | 96 (32.0)  | 62 (31.1)  | 34 (33.3)  |       |
| ≥500                        | 119 (39.7) | 90 (45.5)  | 29 (28.4)  |       |
| Annual stroke case volume   |            |            |            | 0.915 |
| 0-99                        | 34 (11.3)  | 21 (10.6)  | 13 (12.8)  |       |
| 100-199                     | 73 (24.3)  | 47 (23.7)  | 26 (25.5)  |       |
| 200-299                     | 67 (22.3)  | 45 (22.7)  | 22 (21.6)  |       |
| ≥300                        | 126 (42.0) | 85 (42.9)  | 41 (40.2)  |       |
| Number of stroke physicians |            |            |            | 0.139 |
| median (IQR)                | 6 (3, 9)   | 6 (3.8, 9) | 5 (3, 9.3) |       |
| 0-3                         | 82 (27.3)  | 49 (24.8)  | 33 (32.4)  |       |
| 4-6                         | 68 (22.7)  | 43 (21.7)  | 25 (24.5)  |       |
| 7-9                         | 80 (26.7)  | 61 (30.8)  | 19 (18.6)  |       |

1  
2  
3  
4  $\geq 10$  70 (23.3) 45 (22.7) 25 (24.5)  
5  
6

7 \*DPC: Diagnostic Procedure Combination, Hsp: hospital, # p value: Improvement vs. No improvement hospitals, MEA: metropolitan,  
8

9 McEA: micropolitan  
10  
11  
12  
13  
14  
15  
16  
17  
18  
19  
20  
21  
22  
23  
24  
25  
26  
27  
28  
29  
30  
31  
32  
33  
34  
35  
36  
37  
38  
39  
40  
41  
42  
43  
44  
45  
46

For peer review only

Table 4.

| Hospital-related factors in 2010 | Odds | 95%CI     | P value |
|----------------------------------|------|-----------|---------|
| Hospital locations               |      |           |         |
| MEA central                      | 1.00 |           |         |
| MEA outlying                     | 1.42 | 0.76-2.65 | 0.269   |
| McEA                             | 0.82 | 0.36-1.86 | 0.632   |
| CSC score in 2010                | 0.82 | 0.75-0.90 | <0.001  |
| Academic hospital                | 1.37 | 0.54-3.48 | 0.506   |
| DPC hospital                     | 0.77 | 0.41-1.42 | 0.397   |
| Number of beds                   |      |           |         |
| 1-99                             | 1.00 |           |         |
| 100-299                          | 1.16 | 0.37-3.66 | 0.794   |
| 300-499                          | 1.68 | 0.56-5.10 | 0.358   |

|    |                             |      |            |       |
|----|-----------------------------|------|------------|-------|
| 1  |                             |      |            |       |
| 2  |                             |      |            |       |
| 3  |                             |      |            |       |
| 4  | $\geq 500$                  | 3.90 | 1.17-13.00 | 0.027 |
| 5  |                             |      |            |       |
| 6  |                             |      |            |       |
| 7  |                             |      |            |       |
| 8  | Annual stroke case volume   |      |            |       |
| 9  |                             |      |            |       |
| 10 | 1-99                        | 1.00 |            |       |
| 11 |                             |      |            |       |
| 12 | 100-199                     | 1.62 | 0.64-4.07  | 0.305 |
| 13 |                             |      |            |       |
| 14 | 200-299                     | 2.41 | 0.89-6.49  | 0.083 |
| 15 |                             |      |            |       |
| 16 | $\geq 300$                  | 2.74 | 0.99-7.54  | 0.051 |
| 17 |                             |      |            |       |
| 18 |                             |      |            |       |
| 19 |                             |      |            |       |
| 20 | Number of stroke physicians |      |            |       |
| 21 |                             |      |            |       |
| 22 | 0-3                         | 1.00 |            |       |
| 23 |                             |      |            |       |
| 24 | 4-6                         | 1.77 | 0.81-3.88  | 0.153 |
| 25 |                             |      |            |       |
| 26 | 7-9                         | 2.63 | 1.10-6.27  | 0.030 |
| 27 |                             |      |            |       |
| 28 | $\geq 10$                   | 1.58 | 0.57-4.38  | 0.380 |
| 29 |                             |      |            |       |
| 30 |                             |      |            |       |
| 31 |                             |      |            |       |
| 32 |                             |      |            |       |
| 33 |                             |      |            |       |
| 34 |                             |      |            |       |
| 35 |                             |      |            |       |
| 36 |                             |      |            |       |
| 37 |                             |      |            |       |
| 38 |                             |      |            |       |
| 39 |                             |      |            |       |
| 40 |                             |      |            |       |
| 41 |                             |      |            |       |
| 42 |                             |      |            |       |
| 43 |                             |      |            |       |
| 44 |                             |      |            |       |
| 45 |                             |      |            |       |
| 46 |                             |      |            |       |

**Supplemental material**

eTable 1. Univariable analysis of association between consecutively participating hospitals in all three surveys and the others

For peer review only



eTable 1

|                      | All Hsps. in 2010<br>(n=749) | Consecutively<br>participating Hsps.<br>(n=323) | Other Hsps.<br>(n=426) | p value |
|----------------------|------------------------------|-------------------------------------------------|------------------------|---------|
| Hospital location    |                              |                                                 |                        | <0.001  |
| MEA central          | 381 (50.9)                   | 193 (59.8)                                      | 188 (44.1)             |         |
| MEA outlying         | 239 (31.9)                   | 83 (25.7)                                       | 156(36.6)              |         |
| McEA                 | 102 (13.6)                   | 38 (11.8)                                       | 64 (15.0)              |         |
| Unclassified         | 27 (3.6)                     | 9 (2.8)                                         | 18 (4.2)               |         |
| CSC score at 2010    |                              |                                                 |                        |         |
| median (IQR)         | 14 (11, 18)                  | 16 (13, 19)                                     | 13 (10, 17)            | <0.001  |
| Academic hospital    | 90 (12.1)                    | 61 (18.9)                                       | 29 (6.8)               | <0.001  |
| DPC hospital         | 553 (73.8)                   | 237 (73.4)                                      | 316 (74.2)             | 0.804   |
| Number of beds       |                              |                                                 |                        | <0.001  |
| -99                  | 50 (6.7)                     | 19 (5.9)                                        | 31 (7.3)               |         |
| 100-299              | 232 (31.0)                   | 75 (23.2)                                       | 157 (36.9)             |         |
| 300-499              | 260 (34.7)                   | 105 (32.5)                                      | 155 (36.4)             |         |
| ≥500                 | 207 (27.6)                   | 124 (38.4)                                      | 83 (19.5)              |         |
| Annual stroke volume |                              |                                                 |                        | <0.001  |
| -99                  | 129 (17.2)                   | 36 (11.2)                                       | 93 (21.8)              |         |

|    |                  |            |            |            |        |
|----|------------------|------------|------------|------------|--------|
| 1  |                  |            |            |            |        |
| 2  |                  |            |            |            |        |
| 3  |                  |            |            |            |        |
| 4  |                  |            |            |            |        |
| 5  | 100-199          | 199 (26.5) | 76 (23.5)  | 123 (28.9) |        |
| 6  | 200-299          | 155 (20.7) | 70 (21.7)  | 85 (20.0)  |        |
| 7  |                  |            |            |            |        |
| 8  | ≥300             | 228 (30.4) | 127 (39.3) | 101 (23.7) |        |
| 9  |                  |            |            |            |        |
| 10 | N/A              | 38 (5.1)   | 14 (4.3)   | 24 (5.6)   |        |
| 11 | Stroke physician |            |            |            | <0.001 |
| 12 |                  |            |            |            |        |
| 13 | median (IQR)     | 4 (3, 7)   | 5 (3, 9)   | 4 (2, 6)   |        |
| 14 |                  |            |            |            |        |
| 15 |                  |            |            |            |        |
| 16 |                  |            |            |            |        |
| 17 |                  |            |            |            |        |
| 18 |                  |            |            |            |        |
| 19 |                  |            |            |            |        |
| 20 |                  |            |            |            |        |
| 21 |                  |            |            |            |        |
| 22 |                  |            |            |            |        |
| 23 |                  |            |            |            |        |
| 24 |                  |            |            |            |        |
| 25 |                  |            |            |            |        |
| 26 |                  |            |            |            |        |
| 27 |                  |            |            |            |        |
| 28 |                  |            |            |            |        |
| 29 |                  |            |            |            |        |
| 30 |                  |            |            |            |        |
| 31 |                  |            |            |            |        |
| 32 |                  |            |            |            |        |
| 33 |                  |            |            |            |        |
| 34 |                  |            |            |            |        |
| 35 |                  |            |            |            |        |
| 36 |                  |            |            |            |        |
| 37 |                  |            |            |            |        |
| 38 |                  |            |            |            |        |
| 39 |                  |            |            |            |        |
| 40 |                  |            |            |            |        |
| 41 |                  |            |            |            |        |
| 42 |                  |            |            |            |        |
| 43 |                  |            |            |            |        |
| 44 |                  |            |            |            |        |
| 45 |                  |            |            |            |        |
| 46 |                  |            |            |            |        |

# BMJ Open

## Temporal trends and geographical disparities in comprehensive stroke centre capabilities in Japan from 2010 to 2018

|                                 |                                                                                                                                                                                                                                                                                                                                                                                                                                                                                                                                                                                                                                                                                                                                                                                                                                                                                                                                 |
|---------------------------------|---------------------------------------------------------------------------------------------------------------------------------------------------------------------------------------------------------------------------------------------------------------------------------------------------------------------------------------------------------------------------------------------------------------------------------------------------------------------------------------------------------------------------------------------------------------------------------------------------------------------------------------------------------------------------------------------------------------------------------------------------------------------------------------------------------------------------------------------------------------------------------------------------------------------------------|
| Journal:                        | <i>BMJ Open</i>                                                                                                                                                                                                                                                                                                                                                                                                                                                                                                                                                                                                                                                                                                                                                                                                                                                                                                                 |
| Manuscript ID                   | bmjopen-2019-033055.R1                                                                                                                                                                                                                                                                                                                                                                                                                                                                                                                                                                                                                                                                                                                                                                                                                                                                                                          |
| Article Type:                   | Original research                                                                                                                                                                                                                                                                                                                                                                                                                                                                                                                                                                                                                                                                                                                                                                                                                                                                                                               |
| Date Submitted by the Author:   | 21-Jan-2020                                                                                                                                                                                                                                                                                                                                                                                                                                                                                                                                                                                                                                                                                                                                                                                                                                                                                                                     |
| Complete List of Authors:       | KUROGI, AI; Graduate School of Medical Sciences, Kyushu University, neurosurgery<br>Nishimura, Ataru ; Graduate School of Medical Sciences, Kyushu University, neurosurgery<br>Nishimura, Kunihiro; National Cerebral and Cardiovascular Center, Cerebrovascular Medicine<br>Kada, Akiko ; National Hospital Organization Nagoya Medical Center, Department of Clinical Trials and Research<br>Onozuka, Daisuke; Kyushu University,<br>Hagihara, Akihito; Kyusyu University Graduate School of Medicine, Department of Health Services Management and Policy<br>Ogasawara, Kuniaki; Iwate Medical University School of Medicine, Department of Neurosurgery<br>Shiokawa, Yoshiaki ; Kyorin University Hospital, Department of Neurosurgery<br>Kitazono, Takanari; Kyushu University,<br>Arimura, Koichi; Kyushu University, Neurosurgery<br>Iihara, Koji ; Graduate School of Medical Sciences, Kyushu University, neurosurgery |
| <b>Primary Subject Heading</b>: | Neurology                                                                                                                                                                                                                                                                                                                                                                                                                                                                                                                                                                                                                                                                                                                                                                                                                                                                                                                       |
| Secondary Subject Heading:      | Cardiovascular medicine                                                                                                                                                                                                                                                                                                                                                                                                                                                                                                                                                                                                                                                                                                                                                                                                                                                                                                         |
| Keywords:                       | Stroke < NEUROLOGY, comprehensive stroke center, trends, Stroke medicine < INTERNAL MEDICINE                                                                                                                                                                                                                                                                                                                                                                                                                                                                                                                                                                                                                                                                                                                                                                                                                                    |
|                                 |                                                                                                                                                                                                                                                                                                                                                                                                                                                                                                                                                                                                                                                                                                                                                                                                                                                                                                                                 |

SCHOLARONE™  
Manuscripts

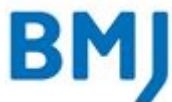

I, the Submitting Author has the right to grant and does grant on behalf of all authors of the Work (as defined in the below author licence), an exclusive licence and/or a non-exclusive licence for contributions from authors who are: i) UK Crown employees; ii) where BMJ has agreed a CC-BY licence shall apply, and/or iii) in accordance with the terms applicable for US Federal Government officers or employees acting as part of their official duties; on a worldwide, perpetual, irrevocable, royalty-free basis to BMJ Publishing Group Ltd ("BMJ") its licensees and where the relevant Journal is co-owned by BMJ to the co-owners of the Journal, to publish the Work in this journal and any other BMJ products and to exploit all rights, as set out in our [licence](#).

The Submitting Author accepts and understands that any supply made under these terms is made by BMJ to the Submitting Author unless you are acting as an employee on behalf of your employer or a postgraduate student of an affiliated institution which is paying any applicable article publishing charge ("APC") for Open Access articles. Where the Submitting Author wishes to make the Work available on an Open Access basis (and intends to pay the relevant APC), the terms of reuse of such Open Access shall be governed by a Creative Commons licence – details of these licences and which [Creative Commons](#) licence will apply to this Work are set out in our licence referred to above.

Other than as permitted in any relevant BMJ Author's Self Archiving Policies, I confirm this Work has not been accepted for publication elsewhere, is not being considered for publication elsewhere and does not duplicate material already published. I confirm all authors consent to publication of this Work and authorise the granting of this licence.

1  
2  
3  
4  
5  
6 Temporal trends and geographical disparities in comprehensive stroke centre  
7  
8 capabilities in Japan from 2010 to 2018  
9

10  
11  
12  
13 Ai Kurogi<sup>1</sup>, Ataru Nishimura<sup>1</sup>, Kunihiro Nishimura<sup>3</sup>, Akiko Kada<sup>4</sup>, Daisuke Onozuka<sup>3</sup>,  
14  
15 Akihito Hagihara<sup>3</sup>, Kuniaki Ogasawara<sup>5</sup>, Yoshiaki Shiokawa<sup>6</sup>, Takanari Kitazono<sup>2</sup>,  
16  
17 Koichi Arimura<sup>1</sup>, and Koji Iihara<sup>1</sup>, on behalf of the J-ASPECT Study Collaborators  
18  
19  
20  
21  
22

23  
24 <sup>1</sup>Department of Neurosurgery, and <sup>2</sup>Department of Medicine and Clinical Science,  
25  
26 Graduate School of Medical Sciences, Kyushu University, Fukuoka, Japan  
27  
28

29  
30 <sup>2</sup>Department of Preventive Medicine and Epidemiology, National Cerebral and  
31  
32 Cardiovascular Center, Suita, Japan  
33  
34

35  
36 <sup>3</sup>Department of Clinical Research Management, Clinical Research Center,  
37  
38 National Hospital Organization Nagoya Medical Center, Nagoya, Japan  
39

40  
41 <sup>4</sup> Department of Clinical Research Management, Clinical Research Center,  
42  
43 National Hospital Organization Nagoya Medical Centre, Nagoya, Japan  
44  
45

46  
47 <sup>5</sup>Department of Neurosurgery, Iwate Medical University, Morioka, Japan  
48

49  
50  
51  
52  
53  
54  
55  
56  
57 <sup>6</sup>Department of Neurosurgery, Kyorin University, Mitaka, Japan  
58  
59

60  
**Corresponding author:** Koji Iihara, Department of Neurosurgery, Graduate  
School of Medical Sciences, Kyushu University, 3-1-1, Higashi-ku, Maidashi,

1  
2  
3  
4  
5  
6  
7  
8  
9  
10  
11  
12  
13  
14  
15  
16  
17  
18  
19  
20  
21  
22  
23  
24  
25  
26  
27  
28  
29  
30  
31  
32  
33  
34  
35  
36  
37  
38  
39  
40  
41  
42  
43  
44  
45  
46  
47  
48  
49  
50  
51  
52  
53  
54  
55  
56  
57  
58  
59  
60

Fukuoka, 812-8582, Japan. Email: kiihara@ns.med.kyushu-u.ac.jp

**Keywords:** stroke, comprehensive stroke centre, care quality

**Word count:** 2,191

For peer review only

## ABSTRACT

Objectives: Comprehensive stroke centre (CSC) capabilities are associated with reduced in-hospital mortality due to acute stroke. However, it remains unclear whether there are improving trends in the CSC capabilities, or how hospital-related factors determine quality improvement. This study examined whether CSC capabilities changed in Japan between 2010 and 2018, and whether any changes were influenced by hospital characteristics.

Design: A hospital-based cross-sectional study.

Setting: We sent out questionnaires to the training institutions of the Japan Neurosurgical Society and Japan Stroke Society in 2010, 2014 and 2018.

Participants: 749 in 2010, 532 in 2014 and 786 in 2018 hospitals that participate in the J-ASPECT study.

Main outcome measures: CSC capabilities were assessed using the validated scoring system (CSC score:1-25 points) in 2010, 2014, and 2018 survey. The effect of hospital characteristics was examined using multiple logistic regression analysis.

1  
2  
3  
4  
5  
6  
7 Results: Among the 323 hospitals that responded to all surveys, the  
8  
9  
10 implementation of 14 recommended items increased. The CSC score (median,  
11  
12  
13 interquartile range) was 16 (13-19), 18 (14-20), 19 (15-21), for 2010, 2014, and  
14  
15  
16 2018, respectively ( $p < 0.001$ ). There was a  $\geq 20\%$  increase in six items (e.g.  
17  
18  
19 endovascular physicians, stroke unit, and interventional coverage 24/7), and a  $\leq$   
20  
21  
22  
23 20% decrease in community education. A lower baseline CSC score (odds ratio  
24  
25  
26 0.82, [95% confidence interval] 0.75-0.9), the number of beds  $\geq 500$  (3.9 [1.2–  
27  
28  
29 13.0]), and the number of stroke physicians (7-9) (2.6 [1.1-6.3]) was associated  
30  
31  
32  
33 with improved CSC capabilities, independent of geographical location.

34  
35  
36 Conclusions: There was a significant improvement in CSC capabilities between  
37  
38  
39 2010 and 2018, which was mainly related to the availability of endovascular  
40  
41  
42 treatment and multidisciplinary care. Our findings may be useful to determine  
43  
44  
45 which hospitals should be targeted to improve CSC capabilities in a defined area.  
46  
47  
48  
49  
50

51 Strengths and limitations of this study:

52  
53  
54 • A large-scale, representative hospitals of Japan provided data on temporal  
55  
56 trends in the CSC capabilities for this cross-sectional study.  
57  
58  
59  
60



1  
2  
3  
4  
5  
6 • Hospitals actively working to improve stroke care are more likely to respond  
7  
8 to the questionnaire, which may lead to information bias.  
9

10  
11 • The CSC score was a significant composite measure to influence in-hospital  
12  
13 mortality of acute stroke, but little information was established on the  
14  
15 influence of specific items.  
16  
17  
18  
19  
20  
21  
22  
23  
24  
25  
26  
27  
28  
29  
30  
31  
32  
33  
34  
35  
36  
37  
38  
39  
40  
41  
42  
43  
44  
45  
46  
47  
48  
49  
50  
51  
52  
53  
54  
55  
56  
57  
58  
59  
60

For peer review only

## INTRODUCTION

Stroke is the third leading cause of death and a leading cause of long-term disability in Japan. Primary and comprehensive stroke centres (CSCs) were developed to provide optimal implementation of intravenous recombinant tissue plasminogen activator (rt-PA) infusion and more intensive stroke care that includes endovascular and neurosurgical treatment.<sup>1, 2</sup> Organised care in a stroke unit is associated with better quality of care and reduced death and dependency.<sup>3, 4</sup> In addition to the influence of this process, previous studies have shown that patient outcomes associated with stroke and cardiovascular diseases are influenced by the hospital case volume,<sup>5, 6</sup> number of physicians, and geographical locations of the facility<sup>7</sup>. Progressive rural-urban disparities in acute stroke care have been reported in the United States,<sup>8</sup> but it is not known whether such disparity exists in other countries.

In 2010, we launched the J-ASPECT study, a nationwide survey of acute stroke care capacity for proper designation of a comprehensive stroke centre in Japan.

<sup>9 10</sup> The J-ASPECT stroke database is a hospital-based, Japan-wide stroke

1  
2  
3  
4  
5  
6 registry. We demonstrated significant geographical differences in CSC  
7  
8  
9 capabilities in 2010,<sup>9</sup> and that CSC capabilities of a facility are associated with  
10  
11 reduced in-hospital mortality from acute stroke.<sup>10</sup> Thus continuous monitoring  
12  
13 of the CSC capabilities may be clinically meaningful to improve stroke  
14  
15 outcomes.<sup>10, 11</sup> Since 2010, we have conducted nationwide benchmark analyses  
16  
17 to allow participating hospitals to facilitate improvement of stroke care.  
18  
19 However, it remains unclear whether there are improving trends in the CSC  
20  
21 capabilities, or how hospital-related factors determine quality improvement.  
22  
23  
24  
25  
26  
27  
28  
29  
30  
31  
32  
33  
34  
35

## 36 AIMS

37  
38 We aimed to examine whether CSC capabilities in Japan changed from 2010 to  
39  
40 2018 and whether any recorded changes were influenced by hospital  
41  
42 characteristics.  
43  
44  
45  
46  
47  
48  
49  
50  
51  
52

## 53 METHODS

### 54 Institutional survey of CSC capabilities

55  
56  
57  
58  
59  
60

1  
2  
3  
4  
5  
6  
7 This cross-sectional survey used the DPC discharge database from participating  
8  
9  
10 institutions in the J-ASPECT study. Participation in the J-ASPECT study was  
11  
12  
13 voluntary. Of the 1369 training institutions certified by the Japan Neurosurgical  
14  
15  
16 Society, the Japanese Society of Neurology, and the Japan Stroke Society, 621  
17  
18  
19 agreed to participate in this study. The J-ASPECT study group analysed the  
20  
21  
22  
23 Diagnosis Procedure Combination (DPC) database to gain new clinical insights  
24  
25  
26 on ischaemic and haemorrhagic stroke, an approach we applied again for this  
27  
28  
29 cross-sectional survey. In this study, we sent out questionnaires to the training  
30  
31  
32  
33 institutions of all three societies in 2010, 2014, and 2018 to assess CSC  
34  
35  
36 capabilities. The CSC capabilities of each facility were assessed with a validated  
37  
38  
39 scoring system (CSC score), using 25 items recommended by the Brain Attack  
40  
41  
42  
43 Coalition<sup>2, 5-7</sup>.

44  
45  
46 All items were classified into five categories: personnel, diagnostic, specific  
47  
48  
49 expertise, infrastructure, and education. A score of 1 was assigned for meeting  
50  
51  
52  
53 each item, yielding a total CSC score of up to 25. Content, constructs, and  
54  
55  
56 predictive validity of this scoring system have been previously reported.<sup>12, 13</sup>  
57  
58  
59  
60

## Other hospital characteristics

Hospital characteristics including number of beds, annual stroke hospitalisations, stroke physicians, academic status, adoption of the Diagnosis Procedure Combination (DPC)-based payment system<sup>9</sup>, and geographic location were obtained from the 2010 survey. The geographic location was classified according to urban employment areas (UEAs) divided into Metropolitan Employment Areas (MEAs) and Micropolitan Employment Areas (McEAs).<sup>9</sup> The MEAs were further classified into central and outlying areas based on the commuting pattern of their inhabitants. Details of UEAs, such as total population or total land area, have been previously described.<sup>10</sup>

## Statistical analysis

To explore trends in CSC capabilities, we examined implementation of the 25 items and the CSC score in the 323 consecutively participating hospitals that responded to all surveys. To examine the influence of hospital-related factors

1  
2  
3  
4  
5  
6 on the change in CSC capabilities, we divided the hospitals into those with or  
7  
8  
9  
10 without a temporal improvement of CSC score ( $\geq 1$ -point increase between 2010  
11  
12  
13 and 2018). The increase of “One point” was set based on our previous report on  
14  
15  
16 the CSC score.<sup>11</sup> In that study, we showed that even a small preceding  
17  
18  
19 improvement of the CSC score was associated with reduced in-hospital  
20  
21  
22 mortality, reduced poor outcomes, and higher use of acute reperfusion therapy  
23  
24  
25 in AIS patients; our findings also suggested the difficulty in improving the CSC  
26  
27  
28 score in a relatively short time period.  
29  
30  
31

32  
33 We used a chi-squared test to detect differences between consecutively participating  
34  
35  
36 hospitals and other hospitals in the number of each hospital item. We did not perform  
37  
38  
39 multiple tests. Wilcoxon rank sum test was used to compare total CSC scores between  
40  
41  
42 consecutively participating hospitals and other hospitals.  
43  
44  
45

46 To explore the influence of hospital-related factors on temporal improvement of  
47  
48  
49 CSC capabilities, multiple logistic regression models were used. To assess  
50  
51  
52 selection bias, we compared hospital characteristics between consecutively  
53  
54  
55 participating hospitals with the others. We also examined the relationship between  
56  
57  
58  
59  
60

1  
2  
3  
4  
5  
6 “number of physicians” and “hospital size” and the relationship between “number of  
7  
8  
9  
10 physicians” and “CSC score” using chi-squared tests. All analyses were performed  
11  
12  
13 using the JMP Statistical Version 12 Software (SAS Institute Inc., Cary, NC,  
14  
15  
16 USA). P values of  $<0.05$  were considered statistically significant.  
17  
18  
19  
20  
21  
22

### 23 **Patient and public involvement**

24  
25  
26 Data for this study are based on information collected by the J-ASPECT study.  
27  
28  
29

30 Patients and the public were not involved in the development of this study.  
31  
32  
33  
34  
35

## 36 **RESULTS**

### 37 38 39 **Trends in the CSC capabilities from 2010 to 2018**

40  
41  
42 A total of 749, 532, and 786 hospitals responded to the survey in 2010, 2014, and  
43  
44  
45 2018, respectively. The implementation rates of each item are shown in Table 1.  
46  
47  
48

49  
50 The median (interquartile range) of the CSC scores was 14 (11-18), 17 (13-19),  
51  
52  
53 and 17 (12-20.3), for each year, respectively (Table 1).  
54  
55

56 Among consecutively participating hospitals, there was an increase in  
57  
58  
59  
60

1  
2  
3  
4  
5  
6  
7 implementation rates of the 14 items, and the CSC scores were (median,  
8  
9  
10 interquartile range): 16 (13-19), 18 (14-20), 19 (15-21), for 2010, 2014, and 2018,  
11  
12  
13 respectively ( $p < 0.001$ ) (Table 1). A marked increase ( $\geq 20\%$ ) was noted in six  
14  
15  
16 items related to endovascular treatment (endovascular physicians and  
17  
18  
19 interventional coverage 24/7) and multidisciplinary care (stroke unit, specialists  
20  
21  
22 of emergency medicine and physical medicine/rehabilitation, and stroke  
23  
24  
25  
26  
27 rehabilitation nurses).

28  
29  
30 In addition, a moderate increase ( $\leq 20\%$ ) was noted in eight items: 24/7  
31  
32  
33 availability of diffusion-weighted magnetic resonance imaging, digital and CT  
34  
35  
36 angiography, carotid ultrasound, coiling of an intracranial aneurysm, and  
37  
38  
39 implementation of stroke registry. In contrast, there was a marked decrease  
40  
41  
42  
43 ( $\leq 20\%$ ) in community education.  
44  
45  
46  
47  
48  
49

### 50 **Geographical differences in CSC capabilities between 2010 and 2018**

51  
52  
53 Among the seven items with significant geographical differences in 2010, all  
54  
55  
56 items in the personal component still showed a gap, despite overall  
57  
58  
59  
60



1  
2  
3  
4  
5  
6 improvement at all locations in 2018 (Table 2). In contrast, geographical  
7  
8  
9 differences in all infrastructure items diminished with overall improvement  
10  
11  
12 and a marked improvement in the McEA in 2018.  
13  
14  
15

16 Over the study period, geographical differences emerged in intra-arterial  
17  
18  
19 reperfusion therapy and the number of specialists in physical  
20  
21  
22 medicine/rehabilitation. The remaining item, coiling of intracranial aneurysms,  
23  
24  
25 showed no changes.  
26  
27  
28  
29  
30  
31  
32

### 33 **Influence of hospital characteristics on change in CSC capabilities**

34  
35  
36 Among consecutively participating hospitals, 23 were excluded due to missing  
37  
38  
39 data. Temporal improvement of CSC capabilities between 2010 and 2018 was  
40  
41  
42 noted in 198 hospitals (66.0%). As for hospital characteristics, there were weakly  
43  
44  
45 significant differences in bed number ( $p=0.016$ ) and CSC score in 2010 ( $p=0.032$ )  
46  
47  
48 between the two groups on univariable analysis (Table 3).  
49  
50  
51

52  
53 In the logistic regression analyses, the following variables had an association  
54  
55  
56 with temporal improvement of CSC capabilities (Table 4): a lower baseline CSC  
57  
58  
59  
60

1  
2  
3  
4  
5  
6 score (odds ratio 0.82 [95% confidence interval 0.75-0.9]), bed volume  $\geq 500$  (3.90,  
7  
8  
9 [1.17–13.0]), and moderate (7-9) number of stroke physicians (2.63, [1.10-6.27]).

10  
11  
12  
13 In contrast, geographical location, academic status, DPC-based payment system,  
14  
15  
16 and case volume of stroke did not show a significant association. We also  
17  
18  
19 performed the logistic regression analysis adjusting tertile, instead of quartile,  
20  
21  
22 of stroke physician volume in addition to the other adjusting factors. Except for  
23  
24  
25 Q3 of stroke physician volume, we found very similar results (Supplementary  
26  
27  
28 Table 1). Additionally, there was a significant relationship between hospital size and  
29  
30  
31 number of physicians ( $P < 0.001$ ), and between CSC score and number of  
32  
33  
34 physicians ( $P < 0.001$ ), and between CSC score and number of  
35  
36  
37 physicians ( $P < 0.001$ ).

### 38 39 40 41 42 43 **Selection bias**

44  
45  
46 The response rates of the 2010, 2014, and 2018 surveys were 55.0%, 39.7%, and  
47  
48  
49 49.9%, respectively. We found that a selection bias did exist; in fact, the total  
50  
51  
52 CSC scores and most of the implementation rates of each item were  
53  
54  
55 significantly higher for the consecutively participating hospitals than for the  
56  
57  
58  
59  
60

1  
2  
3  
4  
5  
6 others in all three surveys (Table 1). Consecutively participating hospitals were  
7  
8  
9  
10 more likely to be MEA-central, academic, have a larger number of hospital beds,  
11  
12  
13 higher annual stroke admission rate, and more stroke physicians  
14  
15  
16 (Supplementary Table 2).  
17  
18  
19  
20  
21  
22  
23  
24  
25  
26

## 27 DISCUSSION

28  
29  
30 We found an overall improvement in CSC capabilities between 2010 and 2018,  
31  
32  
33 and different trends in geographical disparities for different items. Hospitals  
34  
35  
36 with a higher number of hospital beds, intermediate number of stroke  
37  
38  
39 physicians, and a lower baseline CSC score had a higher likelihood of  
40  
41  
42  
43 improving their CSC capabilities.  
44  
45  
46  
47  
48  
49

### 50 **Temporal Changes to CSC capabilities**

51  
52  
53 In addition to a significant increase in CSC capabilities, there was a marked  
54  
55  
56 increase in implementation of the items, mainly related to endovascular  
57  
58  
59  
60

1  
2  
3  
4  
5  
6  
7 treatment and multidisciplinary care. Of note, we previously showed that  
8  
9  
10 interventional 24/7 coverage and the presence of physical  
11  
12  
13 medicine/rehabilitation specialists were associated with reduced in-hospital  
14  
15  
16 mortality for patients with subarachnoid haemorrhage, whereas availability of  
17  
18  
19 neurologists and stroke units were associated with reduced in-hospital  
20  
21  
22 mortality and better functional outcomes, respectively, for those with ischaemic  
23  
24  
25  
26 stroke.<sup>13</sup>  
27  
28  
29

30 These findings are consistent with those of prior studies, which have shown  
31  
32  
33 that admission to a stroke unit with organised stroke care is associated with  
34  
35  
36 better quality of care and outcomes in those who experience an acute stroke.<sup>14 3</sup>  
37  
38  
39

40 Although the use of mechanical thrombectomy for large vessel acute ischaemic  
41  
42  
43 stroke (AIS) has been rapidly increasing, only 3.3% of 15.1% potentially eligible  
44  
45  
46 AIS patients received it in 2016.<sup>15</sup> Improvement of CSC capabilities, especially  
47  
48  
49 related to endovascular treatment and multidisciplinary care, should contribute  
50  
51  
52  
53 to improved quality of care and outcomes in patients with acute stroke.  
54  
55

56 The decreased implementation of community education observed in this study  
57  
58  
59  
60

1  
2  
3  
4  
5  
6  
7 may be explained by the limited number of stroke physicians available for this  
8  
9  
10 purpose due to an increased burden of stroke care (e.g. emergent endovascular  
11  
12  
13 calls).<sup>16</sup> Stroke educational campaigns have the potential to improve  
14  
15  
16 knowledge and awareness, but public campaigns are usually expensive and  
17  
18  
19 short-lived and may not achieve any significant improvement.<sup>17</sup>  
20  
21  
22  
23  
24  
25

### 26 **Diminished and emerging geographical disparities**

27  
28  
29  
30 Determining rural/urban differences in CSC capabilities may support the  
31  
32  
33 development of targeted interventions to improve stroke care and outcomes in  
34  
35  
36 rural areas. We found differing trends in implementation of the items according  
37  
38  
39 to personnel and infrastructure components. Rural areas are associated with  
40  
41  
42 reduced access to optimal stroke care and a lower use of acute stroke  
43  
44  
45 intervention.<sup>18</sup> The diminished disparities in implementation of stroke units in  
46  
47  
48 this study might result in a higher use of rt-PA infusion in rural areas.<sup>19</sup>  
49  
50  
51  
52

53  
54 The emerging disparities in implementation of intraarterial reperfusion  
55  
56  
57 therapy deserve some attention. Since the evidence regarding the efficacy of  
58  
59  
60

1  
2  
3  
4  
5  
6 acute endovascular reperfusion therapy was established in 2015,<sup>20</sup> relocation of  
7  
8  
9  
10 relevant specialists might have occurred from rural to urban areas to meet the  
11  
12  
13 urgent need created by more widespread use. In addition, a high prevalence of  
14  
15  
16 neurointerventional physician burnout may require centralisation of acute  
17  
18  
19 endovascular reperfusion treatment.<sup>21</sup>  
20  
21  
22  
23  
24  
25

### 26 **Influence of hospital-related factors on improvement of CSC capabilities**

27  
28  
29 Our study showed the impact of specific hospital-related factors on  
30  
31  
32 improvement of CSC capabilities, which may be useful to determine which  
33  
34  
35 hospitals should be targeted to improve CSC capabilities, and in what regions.  
36  
37  
38

39  
40 In rural areas, where medical resources are limited, centralisation of acute  
41  
42  
43 stroke care in large hospitals may be needed. We also found a significant  
44  
45  
46 relationship between CSC score and number of physicians. This means that, in  
47  
48  
49 2010, institutions with more physicians tended to have higher baseline CSC scores. The  
50  
51  
52 reason that a physician volume of more than 10 did not affect the improvement of the  
53  
54  
55 CSC score may be explained by the ceiling effect of a high baseline CSC score in 2010.  
56  
57  
58  
59  
60

## Limitations

There are several limitations of this study. First, this findings may have included biased information. Hospitals actively working to improve stroke care would be more likely to respond to the questionnaire. Second, the CSC score was a significant composite measure to influence in-hospital mortality of acute stroke, but little information was established on the influence of specific items. Third, we did not determine the influence of unmeasured confounders. Fourth, the CSC score is a self-reported questionnaire rather than the result of any formal certification process. In Japan, the official certification process for PSCs (primary stroke centres) just began in 2019. The criteria for CSC certification is now under discussion by the Japan Stroke Society. The results of this study could have a significant impact on the recommended items and criteria for the designation of official CSCs in Japan. After the official certification process for CSCs is implemented, we plan to reassess the effect of CSC capabilities on AIS patients. Finally, the 2014 data did not factor into this analysis because of the small number of participants in that year. Further research is

1  
2  
3  
4  
5  
6  
7 required to examine the effect of 2014 data on the analysis.  
8  
9

## 10 **Conclusions**

11  
12  
13 The CSC capabilities in Japan improved between 2010 and 2018, especially  
14  
15  
16 related to endovascular treatment and multidisciplinary care. Our findings may  
17  
18  
19 be useful to determine which hospitals should be targeted to improve CSC capabilities  
20  
21  
22  
23 in a defined area.  
24  
25  
26  
27  
28  
29  
30  
31  
32

## 33 **Funding**

34  
35  
36 The J-ASPECT study is supported by the Practical Research Project for  
37  
38  
39 lifestyle-related diseases, including cardiovascular diseases and diabetes  
40  
41  
42 mellitus, managed by the Japan Agency for Medical Research and Development  
43  
44  
45 [JP19ek0210088 and JP19ek0210129]; Grants-in-Aid from the Japanese Ministry  
46  
47  
48 of Health, Labour, and Welfare; and KAKENHI grants [19AC0101] from the  
49  
50  
51  
52  
53 Japan Society for the Promotion of Science.  
54  
55  
56  
57  
58  
59  
60



### **Competing interests statement**

None declared.

### **Ethics approval**

The study was approved by the Kyushu University Institutional Review Board, which waived the requirement for individual informed consent (No. 28-335)

### **Data availability statement**

We have documented the data, methods, and materials used to conduct the research in this report. The individual patient data are not publicly available because of the memorandum signed by the director of the participating hospitals and the principal investigator of the J-ASPECT Study group.

### **Authors and contributors**

A Kurogi and KI drafted the manuscript. AN, KN, A Kada, DO, AH and KI were involved in study concept, design and obtaining funding. A Kada , DO,

1  
2  
3  
4  
5  
6 AH, KO, YS, TK, KA and KI were involved in analysis and of data. KO, YS, TK  
7  
8  
9  
10 and KI were involved in acquisition of data. All authors reviewed the study  
11  
12  
13 report, made comments or suggestions on the manuscript drafts, and approved  
14  
15  
16 the final version.  
17

### 23 **Acknowledgements**

24  
25  
26 We thank the Japan Neurosurgical Society and the Japan Stroke Society for their  
27  
28  
29 collaboration. We also thank all participating hospitals in the J-ASPECT study for  
30  
31  
32 contributing to this project. The institutions and names of the J-ASPECT Study  
33  
34  
35 Collaborators are listed in Supplemental Appendix 1.  
36  
37  
38  
39  
40  
41  
42

### 43 **Patient consent for publication**

44  
45  
46 Not required.  
47  
48  
49  
50  
51

### 52 **References**

- 53  
54  
55  
56  
57 1. Alberts MJ, Hademenos G, Latchaw RE, et al. Recommendations for  
58  
59  
60

1  
2  
3  
4  
5 the establishment of primary stroke centers. Brain Attack Coalition. *JAMA*  
6  
7  
8 2000;283:3102-9.  
9

10  
11 2. Alberts MJ, Latchaw RE, Selman WR, et al. Recommendations for  
12  
13 Comprehensive Stroke Centers: A Consensus Statement From the Brain Attack  
14  
15 Coalition. *Stroke* 2005;36:1597-616.  
16  
17

18  
19 3. Collaboration SUT. Organised inpatient (stroke unit) care for stroke.  
20  
21  
22 Cochrane Database of Systematic Reviews 2013;Sep 11;(9):CD000197.  
23

24  
25 4. Bray BD, Ayis S, Campbell J, et al. Associations between the  
26  
27 organisation of stroke services, process of care, and mortality in England:  
28  
29 prospective cohort study. *BMJ* 2013;346:f2827.  
30  
31

32  
33 5. Hall RE, Fang J, Hodwitz K, Saposnik G, Bayley MT. Does the Volume  
34  
35 of Ischemic Stroke Admissions Relate to Clinical Outcomes in the Ontario  
36  
37 Stroke System? *Circ Cardiovasc Qual Outcomes* 2015;8(6 Suppl 3):S141-7.  
38  
39

40  
41 6. Ross JS, Normand SL, Wang Y, et al. Hospital volume and 30-day  
42  
43 mortality for three common medical conditions. *N Engl J Med* 2010;362:1110-8.  
44  
45

46  
47 7. Howard G, Kleindorfer DO, Cushman M, et al. Contributors to the  
48  
49 Excess Stroke Mortality in Rural Areas in the United States. *Stroke*  
50  
51 2017;48:1773-8.  
52

53  
54 8. Gonzales S, Mullen MT, Skolarus L, Thibault DP, Udoeyo U, Willis  
55  
56 AW. Progressive rural-urban disparity in acute stroke care. *Neurology*  
57  
58  
59  
60

2017;88:441-8.

9. Iihara K, Nishimura K, Kada A, et al. The impact of comprehensive stroke care capacity on the hospital volume of stroke interventions: a nationwide study in Japan: J-ASPECT study. *J Stroke Cerebrovasc Dis* 2014;23:1001-18.

10. UEA Urban Employment Area. Available: [http://www.csis.u-tokyo.ac.jp/UEA/uea\\_data\\_e.htm](http://www.csis.u-tokyo.ac.jp/UEA/uea_data_e.htm) [Accessed 13 Jan. 2020].

11. Kada A, Ogasawara K, Kitazono T, et al. National trends in outcomes of ischemic stroke and prognostic influence of stroke center capability in Japan, 2010-2016. *Int J Stroke*. 2019.

12. Iihara K, Nishimura K, Kada A, et al. Effects of comprehensive stroke care capabilities on in-hospital mortality of patients with ischemic and hemorrhagic stroke: J-ASPECT study. *PLoS One* 2014;9:e96819.

13. Kada A, Nishimura K, Nakagawara J, et al. Development and validation of a score for evaluating comprehensive stroke care capabilities: J-ASPECT Study. *BMC Neurol* 2017;17:46.

14. Svendsen ML, Ehlers LH, Ingeman A, Johnsen SP. Higher stroke unit volume associated with improved quality of early stroke care and reduced length of stay. *Stroke* 2012;43:3041-5.

15. Smith EE, Saver JL, Cox M, et al. Increase in Endovascular Therapy in Get With The Guidelines-Stroke After the Publication of Pivotal Trials. *Circulation* 2017;136:2303-10.

- 1  
2  
3  
4  
5  
6  
7  
8  
9  
10  
11  
12  
13  
14  
15  
16  
17  
18  
19  
20  
21  
22  
23  
24  
25  
26  
27  
28  
29  
30  
31  
32  
33  
34  
35  
36  
37  
38  
39  
40  
41  
42  
43  
44  
45  
46  
47  
48  
49  
50  
51  
52  
53  
54  
55  
56  
57  
58  
59  
60
16. Williams MM, Wilson TA, Leslie-Mazwi T, et al. The burden of neurothrombectomy call: a multicenter prospective study. *J Neurointerv Surg* 2018.
17. Rasura M, Baldereschi M, Di Carlo A, et al. Effectiveness of public stroke educational interventions: a review. *Eur J Neurol* 2014;21:11-20.
18. Kapral MK, Austin PC, Jeyakumar G, et al. Rural-Urban Differences in Stroke Risk Factors, Incidence, and Mortality in People With and Without Prior Stroke. *Circ Cardiovasc Qual Outcomes* 2019;12:e004973.
19. Domino JS, Baek J, Meurer WJ, et al. Emerging temporal trends in tissue plasminogen activator use: Results from the BASIC project. *Neurology* 2016;87:2184-91.
20. Goyal M, Menon BK, van Zwam WH, et al. Endovascular thrombectomy after large-vessel ischaemic stroke: a meta-analysis of individual patient data from five randomised trials. *The Lancet* 2016;387:1723-31.
21. Fargen KM, Arthur AS, Leslie-Mazwi T, et al. A survey of burnout and professional satisfaction among United States neurointerventionalists. *J Neurointerv Surg* 2019.

Table 1. Number (percentage) of the responding hospitals fulfilling the recommended items of comprehensive stroke care capabilities

| Components | Items                   | 2010                                  |                                                    |                        |         | 2014                                  |                                                    |    |
|------------|-------------------------|---------------------------------------|----------------------------------------------------|------------------------|---------|---------------------------------------|----------------------------------------------------|----|
|            |                         | All participating<br>Hsps.<br>(n=749) | Consecutively<br>participating<br>Hsps.<br>(n=323) | Other Hsps.<br>(n=426) | p value | All participating<br>Hsps.<br>(n=532) | Consecutively<br>participating<br>Hsps.<br>(n=323) | C  |
| Personnel  | Neurologists            | 358 (47.8)                            | 176 (54.5)                                         | 182 (42.7)             | 0.001   | 283 (53.2)                            | 177 (54.8)                                         | 10 |
|            | Neurosurgeons           | 694 (92.7)                            | 314 (97.2)                                         | 380 (89.2)             | <0.001  | 515 (96.8)                            | 317 (98.1)                                         | 19 |
|            | Endovascular physicians | 272 (36.3)                            | 146 (45.2)                                         | 126 (29.6)             | <0.001  | 280 (52.6)                            | 196 (60.7)                                         | 84 |
|            | Emergency medicine      | 162 (21.6)                            | 96 (29.7)                                          | 66 (15.5)              | <0.001  | 207 (38.9)                            | 146 (45.2)                                         | 61 |

|            |                                      |            |            |            |        |            |            |    |
|------------|--------------------------------------|------------|------------|------------|--------|------------|------------|----|
|            | Physical medicine and rehabilitation | 113 (15.1) | 61 (18.9)  | 52 (12.2)  | 0.011  | 143 (26.9) | 95 (29.4)  | 48 |
|            | Rehabilitation therapy               | 742 (99.1) | 321 (99.4) | 421 (98.8) | 0.435  | 529 (99.4) | 321 (99.4) | 20 |
|            | Stroke rehabilitation nurses         | 102 (13.6) | 48 (14.9)  | 54 (12.7)  | 0.388  | 157 (29.5) | 116 (35.9) | 41 |
| Diagnostic | CT                                   | 742 (99.1) | 322 (99.7) | 420 (98.6) | 0.122  | 527 (99.1) | 322 (99.7) | 20 |
|            | MRI with diffusion                   | 647 (86.4) | 291 (90.1) | 356 (83.6) | 0.01   | 504 (94.7) | 311 (96.3) | 19 |
|            | Digital cerebral angiography         | 602 (80.3) | 288 (89.2) | 314 (73.7) | <0.001 | 476 (89.4) | 305 (94.4) | 17 |
|            | CT angiography                       | 627 (83.7) | 289 (89.5) | 338 (79.3) | <0.001 | 492 (92.5) | 305 (94.4) | 18 |
|            | Carotid duplex ultrasound            | 257 (34.3) | 126 (39.0) | 131 (30.8) | 0.018  | 219 (41.2) | 153 (47.4) | 66 |

|    |           |                            |            |            |            |        |            |            |    |
|----|-----------|----------------------------|------------|------------|------------|--------|------------|------------|----|
| 1  |           |                            |            |            |            |        |            |            |    |
| 2  |           |                            |            |            |            |        |            |            |    |
| 3  |           |                            |            |            |            |        |            |            |    |
| 4  |           |                            |            |            |            |        |            |            |    |
| 5  |           | TCD                        | 121 (16.2) | 70 (21.7)  | 51 (12.0)  | <0.001 | 123 (23.1) | 87 (26.9)  | 36 |
| 6  |           |                            |            |            |            |        |            |            |    |
| 7  |           |                            |            |            |            |        |            |            |    |
| 8  |           |                            |            |            |            |        |            |            |    |
| 9  | Specific  |                            |            |            |            |        |            |            |    |
| 10 |           | Carotid endarterectomy     | 603 (80.5) | 292 (90.4) | 311 (73.0) | <0.001 | 458 (86.1) | 288 (89.2) | 17 |
| 11 |           |                            |            |            |            |        |            |            |    |
| 12 | Expertise |                            |            |            |            |        |            |            |    |
| 13 |           |                            |            |            |            |        |            |            |    |
| 14 |           |                            |            |            |            |        |            |            |    |
| 15 |           | Clipping of intracranial   |            |            |            |        |            |            |    |
| 16 |           |                            |            |            |            |        |            |            |    |
| 17 |           |                            | 685 (91.5) | 314 (97.2) | 371 (87.1) | <0.001 | 504 (94.7) | 315 (97.5) | 18 |
| 18 |           | aneurysm                   |            |            |            |        |            |            |    |
| 19 |           |                            |            |            |            |        |            |            |    |
| 20 |           |                            |            |            |            |        |            |            |    |
| 21 |           |                            |            |            |            |        |            |            |    |
| 22 |           | Hematoma                   |            |            |            |        |            |            |    |
| 23 |           |                            |            |            |            |        |            |            |    |
| 24 |           |                            | 689 (92.0) | 315 (97.5) | 374 (87.8) | <0.001 | 505 (95.0) | 315 (97.5) | 19 |
| 25 |           | removal/draining           |            |            |            |        |            |            |    |
| 26 |           |                            |            |            |            |        |            |            |    |
| 27 |           |                            |            |            |            |        |            |            |    |
| 28 |           |                            |            |            |            |        |            |            |    |
| 29 |           | Coiling of intracranial    |            |            |            |        |            |            |    |
| 30 |           |                            |            |            |            |        |            |            |    |
| 31 |           |                            | 360 (48.1) | 192 (59.4) | 168 (39.4) | <0.001 | 332 (62.4) | 223 (69.0) | 10 |
| 32 |           | aneurysm                   |            |            |            |        |            |            |    |
| 33 |           |                            |            |            |            |        |            |            |    |
| 34 |           |                            |            |            |            |        |            |            |    |
| 35 |           | Intra-arterial reperfusion | 498 (66.5) | 245 (75.9) | 253 (59.4) | <0.001 | 398 (74.8) | 261 (80.8) | 13 |
| 36 |           |                            |            |            |            |        |            |            |    |
| 37 |           |                            |            |            |            |        |            |            |    |
| 38 |           |                            |            |            |            |        |            |            |    |
| 39 |           |                            |            |            |            |        |            |            |    |
| 40 |           |                            |            |            |            |        |            |            |    |
| 41 |           |                            |            |            |            |        |            |            |    |
| 42 |           |                            |            |            |            |        |            |            |    |
| 43 |           |                            |            |            |            |        |            |            |    |
| 44 |           |                            |            |            |            |        |            |            |    |
| 45 |           |                            |            |            |            |        |            |            |    |
| 46 |           |                            |            |            |            |        |            |            |    |



|                 |                                       |            |            |            |        |            |            |    |
|-----------------|---------------------------------------|------------|------------|------------|--------|------------|------------|----|
|                 | therapy                               |            |            |            |        |            |            |    |
| Infrastructure  | Stroke unit                           | 132 (17.6) | 74 (22.9)  | 58 (13.6)  | <0.001 | 202 (38.0) | 136 (42.1) | 66 |
|                 | Intensive care unit                   | 445 (59.4) | 214 (66.3) | 231 (54.2) | <0.001 | 362 (68.0) | 224 (69.4) | 13 |
|                 | Operating room staffed 24/7           | 451 (60.2) | 230 (71.2) | 221 (51.9) | <0.001 | 339 (63.7) | 239 (74.0) | 10 |
|                 | Interventional services coverage 24/7 | 279 (37.3) | 147 (45.5) | 132 (31.0) | <0.001 | 317 (59.6) | 218 (67.5) | 99 |
|                 | Stroke registry                       | 235 (31.4) | 133 (41.2) | 102 (23.9) | <0.001 | 260 (48.9) | 172 (53.3) | 88 |
| Education       | Community education                   | 369 (49.3) | 188 (58.2) | 181 (42.5) | <0.001 | 144 (27.1) | 91 (28.2)  | 53 |
|                 | Professional education                | 436 (58.2) | 207 (64.1) | 229 (53.8) | 0.005  | 326 (61.3) | 208 (64.4) | 11 |
| Total CSC score |                                       |            |            |            |        |            |            |    |

1  
2  
3  
4  
5  
6  
7  
8  
9  
10  
11  
12  
13  
14  
15  
16  
17  
18  
19  
20  
21  
22  
23  
24  
25  
26  
27  
28  
29  
30  
31  
32  
33  
34  
35  
36  
37  
38  
39  
40  
41  
42  
43  
44  
45  
46

|                  |             |             |             |        |             |             |    |
|------------------|-------------|-------------|-------------|--------|-------------|-------------|----|
| median,<br>(IQR) | 14 (11, 18) | 16 (13, 19) | 13 (10, 17) | <0.001 | 17 (13, 19) | 18 (14, 20) | 15 |
|------------------|-------------|-------------|-------------|--------|-------------|-------------|----|

Hsp, hospital; CT, computed tomography; MRI, magnetic resonance imaging; TCD, transcranial Doppler.

For peer review only

Table 2. Characteristics of comprehensive stroke care capabilities according to the geographical differences

|           |                                      | a) 2010     |              |           |         | b) 2018     |              |           |
|-----------|--------------------------------------|-------------|--------------|-----------|---------|-------------|--------------|-----------|
|           |                                      | MEA central | MEA outlying | McEA      | P value | MEA central | MEA outlying | McEA      |
|           |                                      | (n=186)     | (n=79)       | (n=35)    |         | (n=186)     | (n=79)       | (n=35)    |
| Personnel | Neurologists                         | 115 (61.8)  | 44 (55.7)    | 10 (28.6) | 0.001   | 133(71.5)   | 55(69.6)     | 14 (40.0) |
|           | Neurosurgeons                        | 181 (97.3)  | 77 (97.5)    | 34 (97.1) | 0.995   | 183 (98.4)  | 78 (98.7)    | 34 (97.1) |
|           | Endovascular physicians              | 101 (54.3)  | 31 (39.2)    | 8 (22.9)  | <0.001  | 136 (73.1)  | 49 (62.0)    | 14 (40.0) |
|           | Emergency medicine                   | 57 (30.7)   | 25 (31.7)    | 7 (20.0)  | 0.406   | 122 (65.6)  | 54 (68.4)    | 16 (45.7) |
|           | Physical medicine and rehabilitation | 36 (19.4)   | 16 (20.3)    | 5 (14.3)  | 0.740   | 83 (44.6)   | 42 (53.2)    | 3 (8.6)   |
|           | Rehabilitation therapy               | 185 (99.5)  | 78 (98.7)    | 35 (100)  | 0.701   | 185 (99.5)  | 78 (98.7)    | 35 (100)  |

|                    |                                   |            |            |            |       |            |           |           |
|--------------------|-----------------------------------|------------|------------|------------|-------|------------|-----------|-----------|
|                    | Stroke rehabilitation nurses      | 33 (17.8)  | 9 (11.4)   | 1 (2.9)    | 0.049 | 90 (48.4)  | 41 (51.9) | 9 (25.7)  |
| Diagnostic         | CT                                | 185 (99.5) | 79 (100.0) | 35 (100.0) | 0.735 | 185 (100)  | 79 (100)  | 35 (100)  |
|                    | MRI with diffusion                | 167 (89.8) | 69 (87.3)  | 33 (94.3)  | 0.530 | 179 (96.2) | 78 (98.7) | 35 (100)  |
|                    | Digital cerebral angiography      | 165 (88.7) | 70 (88.6)  | 34 (97.1)  | 0.303 | 168 (90.3) | 76 (96.2) | 33 (94.3) |
|                    | CT angiography                    | 163 (87.6) | 72 (91.1)  | 32 (91.4)  | 0.627 | 176 (94.6) | 77 (97.5) | 34 (97.1) |
|                    | Carotid duplex ultrasound         | 71 (38.1)  | 30 (38.0)  | 14 (40.0)  | 0.977 | 95 (51.1)  | 48 (60.8) | 15 (42.9) |
|                    | TCD                               | 43 (23.1)  | 18 (22.8)  | 3 (8.6)    | 0.146 | 54 (29.0)  | 29 (36.7) | 5 (14.3)  |
| Specific Expertise | Carotid endarterectomy            | 173 (93.0) | 68 (86.1)  | 32 (91.4)  | 0.196 | 166 (89.3) | 71 (89.9) | 28 (80)   |
|                    | Clipping of intracranial aneurysm | 183 (98.4) | 75 (94.9)  | 34 (97.1)  | 0.280 | 181 (97.3) | 77 (97.5) | 34 (97.1) |
|                    | Hematoma removal/draining         | 183 (98.4) | 76 (96.2)  | 34 (97.1)  | 0.546 | 182 (97.9) | 77 (97.5) | 35 (94.3) |
|                    | Coiling of intracranial aneurysm  | 119 (64.0) | 46 (58.2)  | 13 (37.1)  | 0.012 | 143 (76.9) | 49 (62.0) | 17 (48.6) |

|                |                                       |            |           |           |        |            |           |           |
|----------------|---------------------------------------|------------|-----------|-----------|--------|------------|-----------|-----------|
|                | Intra-arterial reperfusion therapy    | 142 (76.3) | 58 (73.4) | 27 (77.1) | 0.859  | 153 (82.3) | 57 (72.2) | 22 (62.9) |
| Infrastructure | Stroke unit                           | 50 (26.9)  | 17 (21.5) | 2 (5.7)   | 0.023  | 106 (57.0) | 44 (55.7) | 13 (37.1) |
|                | Intensive care unit                   | 123 (66.1) | 54 (68.4) | 21 (60.0) | 0.685  | 134 (72.0) | 54 (68.4) | 18 (51.4) |
|                | Operating room staffed 24/7           | 143 (76.9) | 59 (74.7) | 15 (42.9) | <0.001 | 148 (79.6) | 56 (70.9) | 22 (62.9) |
|                | Interventional services coverage 24/7 | 103 (55.4) | 30 (38.0) | 6 (17.1)  | <0.001 | 133 (71.5) | 54 (68.4) | 18 (51.4) |
|                | Stroke registry                       | 81 (43.6)  | 31 (29.1) | 15 (42.9) | 0.808  | 93 (50.0)  | 47 (59.5) | 15 (42.9) |
| Education      | Community education                   | 110 (59.1) | 53 (67.1) | 17 (48.6) | 0.164  | 55 (29.6)  | 28 (35.4) | 8 (22.9)  |
|                | Professional education                | 125 (67.2) | 53 (67.1) | 17 (48.6) | 0.095  | 105 (56.5) | 47 (59.5) | 17 (48.6) |

\*MEA

metropolitan,

McEA

microplitan

1  
2  
3  
4  
5  
6  
7  
8  
9  
10  
11  
12  
13  
14  
15  
16  
17  
18  
19  
20  
21  
22  
23  
24  
25  
26  
27  
28  
29  
30  
31  
32  
33  
34  
35  
36  
37  
38  
39  
40  
41  
42  
43  
44  
45  
46

For peer review only

Table 3. Hospital characteristics those with/without temporal improvement of the CSC capabilities

| Hospital-related factors in 2010 | all participating<br>(n=300) | Consecutively<br>Hsps. | Improvement<br>Hsps.<br>(n=198) | No improvement<br>Hsps.<br>(n=102) | p value <sup>#</sup> |
|----------------------------------|------------------------------|------------------------|---------------------------------|------------------------------------|----------------------|
| Hospital locations               |                              |                        |                                 |                                    | 0.478                |
| MEA central                      | 186 (62.0)                   |                        | 121 (61.1)                      | 65 (63.7)                          |                      |
| MEA outlying                     | 79 (26.3)                    |                        | 56 (28.3)                       | 23 (22.6)                          |                      |
| McEA                             | 35 (11.7)                    |                        | 21 (10.6)                       | 14 (13.7)                          |                      |
| CSC score in 2010                |                              |                        |                                 |                                    |                      |
| median (IQR)                     | 16 (13, 19)                  |                        | 16 (13, 18)                     | 17 (13, 20)                        | 0.032                |
| Academic hospital                | 58 (19.3)                    |                        | 42 (21.2)                       | 16 (15.7)                          | 0.251                |
| DPC* hospital                    | 225 (75.0)                   |                        | 145 (73.2)                      | 80 (78.4)                          | 0.325                |
| Number of hospital beds          |                              |                        |                                 |                                    | 0.016                |
| 1-99                             | 17 (5.7)                     |                        | 9 (4.6)                         | 8 (7.8)                            |                      |
| 100-299                          | 68 (22.7)                    |                        | 37 (18.7)                       | 31 (30.4)                          |                      |
| 300-499                          | 96 (32.0)                    |                        | 62 (31.1)                       | 34 (33.3)                          |                      |

|    |                                       |            |            |            |       |
|----|---------------------------------------|------------|------------|------------|-------|
| 1  |                                       |            |            |            |       |
| 2  |                                       |            |            |            |       |
| 3  |                                       |            |            |            |       |
| 4  |                                       |            |            |            |       |
| 5  | ≥500                                  | 119 (39.7) | 90 (45.5)  | 29 (28.4)  |       |
| 6  |                                       |            |            |            |       |
| 7  |                                       |            |            |            |       |
| 8  | Annual stroke case volume             |            |            |            | 0.915 |
| 9  | 0-99                                  | 34 (11.3)  | 21 (10.6)  | 13 (12.8)  |       |
| 10 | 100-199                               | 73 (24.3)  | 47 (23.7)  | 26 (25.5)  |       |
| 11 | 200-299                               | 67 (22.3)  | 45 (22.7)  | 22 (21.6)  |       |
| 12 | ≥300                                  | 126 (42.0) | 85 (42.9)  | 41 (40.2)  |       |
| 13 |                                       |            |            |            |       |
| 14 |                                       |            |            |            |       |
| 15 |                                       |            |            |            |       |
| 16 |                                       |            |            |            |       |
| 17 |                                       |            |            |            |       |
| 18 | Number of stroke physician volume     |            |            |            |       |
| 19 | median (IQR)                          | 6 (3, 9)   | 6 (3.8, 9) | 5 (3, 9.3) | 0.139 |
| 20 |                                       |            |            |            |       |
| 21 | Number of stroke physicians, quartile |            |            |            |       |
| 22 |                                       |            |            |            |       |
| 23 | Q1 (0-3)                              | 82 (27.3)  | 49 (24.8)  | 33 (32.4)  |       |
| 24 | Q2 (4-6)                              | 68 (22.7)  | 43 (21.7)  | 25 (24.5)  |       |
| 25 | Q3 (7-9)                              | 80 (26.7)  | 61 (30.8)  | 19 (18.6)  |       |
| 26 | Q4 (≥10)                              | 70 (23.3)  | 45 (22.7)  | 25 (24.5)  |       |
| 27 |                                       |            |            |            |       |
| 28 |                                       |            |            |            |       |
| 29 |                                       |            |            |            |       |
| 30 |                                       |            |            |            |       |
| 31 |                                       |            |            |            |       |
| 32 |                                       |            |            |            |       |
| 33 | Number of stroke physicians, tertile  |            |            |            |       |
| 34 | T1 (0-4)                              | 114 (38.0) | 72 (36.4)  | 42 (41.2)  |       |
| 35 | T2 (4-8)                              | 96 (32.0)  | 63 (31.8)  | 33 (32.4)  |       |
| 36 | T3 (≥9)                               | 90 (30.0)  | 63 (31.8)  | 27 (26.5)  |       |
| 37 |                                       |            |            |            |       |
| 38 |                                       |            |            |            |       |
| 39 |                                       |            |            |            |       |
| 40 |                                       |            |            |            |       |
| 41 |                                       |            |            |            |       |
| 42 |                                       |            |            |            |       |
| 43 |                                       |            |            |            |       |
| 44 |                                       |            |            |            |       |
| 45 |                                       |            |            |            |       |
| 46 |                                       |            |            |            |       |



1  
2  
3  
4  
5  
6  
7 \*DPC: Diagnostic Procedure Combination, Hsp: hospital, # p value: Improvement vs. No improvement hospitals, MEA:  
8  
9 metropolitan, McEA: micropolitan  
10  
11  
12  
13  
14  
15  
16  
17  
18  
19  
20  
21  
22  
23  
24  
25  
26  
27  
28  
29  
30  
31  
32  
33  
34  
35  
36  
37  
38  
39  
40  
41  
42  
43  
44  
45  
46

For peer review only

Table 4. Multivariable analysis of the impact of hospital characteristics on one-point increases of the CSC score

| Hospital-related factors in 2010 | Odds | 95%CI     | P value          |
|----------------------------------|------|-----------|------------------|
| Hospital locations               |      |           |                  |
| MEA central                      | ref. |           |                  |
| MEA outlying                     | 1.42 | 0.76-2.65 | 0.269            |
| McEA                             | 0.82 | 0.36-1.86 | 0.632            |
| CSC score in 2010                | 0.82 | 0.75-0.90 | <b>&lt;0.001</b> |

|                   |      |            |              |
|-------------------|------|------------|--------------|
| Academic hospital | 1.37 | 0.54-3.48  | 0.506        |
| DPC hospital      | 0.77 | 0.41-1.42  | 0.397        |
| Number of beds    |      |            |              |
| 1-99              | ref. |            |              |
| 100-299           | 1.16 | 0.37-3.66  | 0.794        |
| 300-499           | 1.68 | 0.56-5.10  | 0.358        |
| ≥500              | 3.9  | 1.17-13.00 | <b>0.027</b> |

| Annual stroke case volume                  |      |           |       |
|--------------------------------------------|------|-----------|-------|
| 1-99                                       | ref. |           |       |
| 100-199                                    | 1.62 | 0.64-4.07 | 0.305 |
| 200-299                                    | 2.41 | 0.89-6.49 | 0.083 |
| ≥300                                       | 2.74 | 0.99-7.54 | 0.051 |
| Number of stroke physician volume quartile |      |           |       |
| Q1 (0-3)                                   | ref. |           |       |
| Q2 (4-6)                                   | 1.77 | 0.81-3.88 | 0.153 |

For peer review only

1  
2  
3  
4  
5  
6  
7  
8  
9  
10  
11  
12  
13  
14  
15  
16  
17  
18  
19  
20  
21  
22  
23  
24  
25  
26  
27  
28  
29  
30  
31  
32  
33  
34  
35  
36  
37  
38  
39  
40  
41  
42  
43  
44  
45  
46

|                  |      |           |              |
|------------------|------|-----------|--------------|
| Q3 (7-9)         | 2.63 | 1.10-6.27 | <b>0.030</b> |
| Q4 ( $\geq 10$ ) | 1.58 | 0.57-4.38 | 0.380        |

\*DPC: Diagnostic Procedure Combination, Hsp: hospital, # p value: Improvement vs. No improvement hospitals, MEA: metropolitan, McEA: micropolitan

1  
2  
3  
4  
5  
6  
7  
8  
9  
10  
11  
12  
13  
14  
15  
16  
17  
18  
19  
20  
21  
22  
23  
24  
25  
26  
27  
28  
29  
30  
31  
32  
33  
34  
35  
36  
37  
38  
39  
40  
41  
42  
43  
44  
45  
46

**Supplemental material**

eTable 1. Multivariable analysis of the impact of the hospital characteristics on one-point increase of the CSC score

eTable 2. Univariable analysis of association between consecutively participating hospitals in all three surveys and the others

Supplemental Appendix 1. List of the J-ASPECT Study Collaborators.

For peer review only

eTable 1 Multivariable analysis of the impact of the hospital characteristics on one-point increase of the CSC score

| Hospital-related factors in 2010 | Odds | 95%CI      | P value          |
|----------------------------------|------|------------|------------------|
| Hospital locations               |      |            |                  |
| MEA central                      | ref. |            |                  |
| MEA outlying                     | 1.35 | 0.36-2.48  | 0.339            |
| McEA                             | 0.78 | 0.35-1.75  | 0.549            |
| CSC score in 2010                | 0.83 | 0.76-0.91  | <b>&lt;0.001</b> |
| Academic hospital                | 1.29 | 0.52-3.24  | 0.582            |
| DPC hospital                     | 0.72 | 0.39-1.34  | 0.302            |
| Number of beds                   |      |            |                  |
| 1-99                             | ref. |            |                  |
| 100-299                          | 1.1  | 0.36-3.41  | 0.868            |
| 300-499                          | 1.82 | 0.60-5.48  | 0.285            |
| ≥500                             | 3.81 | 1.16-12.54 | <b>0.028</b>     |
| Annual stroke case volume        |      |            |                  |

|                                      |      |           |              |
|--------------------------------------|------|-----------|--------------|
| 1-99                                 | ref. |           |              |
| 100-199                              | 1.68 | 0.67-4.18 | 0.267        |
| 200-299                              | 2.47 | 0.92-6.61 | 0.072        |
| ≥300                                 | 3.17 | 1.16-8.66 | <b>0.024</b> |
| Number of stroke physicians, tertile |      |           |              |
| T1 (0-4)                             | ref. |           |              |
| T2 (4-8)                             | 1.12 | 0.58-2.16 | 0.745        |
| T3 (≥9)                              | 1.35 | 0.57-3.21 | 0.492        |



eTable 2 Univariable analysis of association between consecutively participating hospitals in all three surveys and the others

|                      | All Hsps. in 2010<br>(n=749) | Consecutively<br>participating Hsps.<br>(n=323) | Other Hsps.<br>(n=426) | p value |
|----------------------|------------------------------|-------------------------------------------------|------------------------|---------|
| Hospital location    |                              |                                                 |                        | <0.001  |
| MEA central          | 381 (50.9)                   | 193 (59.8)                                      | 188 (44.1)             |         |
| MEA outlying         | 239 (31.9)                   | 83 (25.7)                                       | 156(36.6)              |         |
| McEA                 | 102 (13.6)                   | 38 (11.8)                                       | 64 (15.0)              |         |
| Unclassified         | 27 (3.6)                     | 9 (2.8)                                         | 18 (4.2)               |         |
| CSC score at 2010    |                              |                                                 |                        |         |
| median (IQR)         | 14 (11, 18)                  | 16 (13, 19)                                     | 13 (10, 17)            | <0.001  |
| Academic hospital    | 90 (12.1)                    | 61 (18.9)                                       | 29 (6.8)               | <0.001  |
| DPC hospital         | 553 (73.8)                   | 237 (73.4)                                      | 316 (74.2)             | 0.804   |
| Number of beds       |                              |                                                 |                        | <0.001  |
| <99                  | 50 (6.7)                     | 19 (5.9)                                        | 31 (7.3)               |         |
| 100-299              | 232 (31.0)                   | 75 (23.2)                                       | 157 (36.9)             |         |
| 300-499              | 260 (34.7)                   | 105 (32.5)                                      | 155 (36.4)             |         |
| ≥500                 | 207 (27.6)                   | 124 (38.4)                                      | 83 (19.5)              |         |
| Annual stroke volume |                              |                                                 |                        | <0.001  |
| <99                  | 129 (17.2)                   | 36 (11.2)                                       | 93 (21.8)              |         |

1  
2  
3  
4  
5  
6  
7  
8  
9  
10  
11  
12  
13  
14  
15  
16  
17  
18  
19  
20  
21  
22  
23  
24  
25  
26  
27  
28  
29  
30  
31  
32  
33  
34  
35  
36  
37  
38  
39  
40  
41  
42  
43  
44  
45  
46

|                                                 |            |            |            |        |
|-------------------------------------------------|------------|------------|------------|--------|
| 100-199                                         | 199 (26.5) | 76 (23.5)  | 123 (28.9) |        |
| 200-299                                         | 155 (20.7) | 70 (21.7)  | 85 (20.0)  |        |
| ≥300                                            | 228 (30.4) | 127 (39.3) | 101 (23.7) |        |
| N/A                                             | 38 (5.1)   | 14 (4.3)   | 24 (5.6)   |        |
| Number of stroke<br>physicians, median<br>(IQR) | 4 (3, 7)   | 5 (3, 9)   | 4 (2, 6)   | <0.001 |

\*DPC: Diagnostic Procedure Combination, Hsp: hospital, MEA: metropolitan, McEA: micropolitan

Supplemental Appendix 1. List of the J-ASPECT Study Collaborators.

All Contributors were involved in collection of data.

| Hospitals                                | Responsible persons               |
|------------------------------------------|-----------------------------------|
| Ainomiyako Neurosurgery Hospital         | Isao Sasaki                       |
| Aizawa Hospital                          | Takao Hasimoto                    |
| Akita University Hospital                | Hiroaki Shimizu                   |
| Akocity Hospital                         | Minoru Asahi                      |
| Almeida Memorial Hospital                | Makoto Goda                       |
| Aomori City Hospital                     | Atsuhito Takemura                 |
| Aomori Prefectural Central Hospital      | Tatsuya Sasaki                    |
| Asahi General Hospital                   | Saburo Watanabe                   |
| Ashiya Municipal Hospital                | Seiko Kataoka                     |
| Atsuchi Neurosurgical Hospital           | Kouji Takasaki                    |
| Ayabe City Hospital                      | Kouji Shiga                       |
| Baba Memorial Hospital                   | Hidehuku Gi                       |
| Bellland General Hospital                | Ryunosuke Uranishi                |
| Beppu Medical Center                     | Yasuyuki Nagai                    |
| Chiba Cancer Center                      | Toshihiko Iuchi                   |
| Chiba Cerebral and Cardiovascular Center | Toshio Machida, Junichiro Shimada |
| Chiba Neurosurgical Clinic               | Kenji Wakui                       |
| Chiba Rosai Hospital                     | Takashi Saegusa                   |

1  
2  
3  
4  
5  
6  
7  
8  
9  
10  
11  
12  
13  
14  
15  
16  
17  
18  
19  
20  
21  
22  
23  
24  
25  
26  
27  
28  
29  
30  
31  
32  
33  
34  
35  
36  
37  
38  
39  
40  
41  
42  
43  
44  
45  
46

|                                                              |                                   |
|--------------------------------------------------------------|-----------------------------------|
| Chiba Tokushukai Hospital                                    | Isao Kitahara                     |
| Chidoribashi Hospital                                        | Yasushi Ejima                     |
| Chigasaki Municipal Hospital                                 | Takaakira Yokoyama                |
| Chikamori Hospital (Chikamori Health Care Group)             | Satoru Hayashi                    |
| Chutoen General Medical Center                               | Toshikazu Ichihashi               |
| Corporate Medical Association Shoikai Kasai Shoikai Hospital | Junichi Harashina                 |
| Daiichitowakaihospital                                       | Tsugumichi Ichioka                |
| Daiyukai General Hospital                                    | Takayuki Kato, Shinichi Shirakami |
| Date Red Cross Hospital                                      | Takeshi Matsuoka                  |
| Department of Neurosurgery Shiroyama Hospital                | Kenichi Murao                     |
| Dokkyo Medical University Koshigaya Hospital                 | Akio Hyodo, Tomoyuki Miyamoto     |
| Doutounoushinnkeigekabyouinn                                 | Teruo Kimura                      |
| Ebina General Hospital                                       | Tomonori Kobayashi                |
| Ehime Prefectural Central Hospital                           | Shinji Iwata                      |
| Faculty of Medicine, Saga University                         | Tatsuya Abe                       |
| Faculty of Medicine, University of Miyazaki                  | Hideo Takeshima                   |
| Fuchu Hospital                                               | Kazunori Yamanaka                 |
| Fuji City General Hospital                                   | Satoru Morooka                    |
| Fujii Neurosurgical Hospital                                 | Hideo Kunimine                    |
| Fujita General Hospital                                      | Satoshi Taira                     |
| Fujita Health University Hospital                            | Ichiro Nakahara, Yuichi Hirose    |

|    |                                       |                           |
|----|---------------------------------------|---------------------------|
| 1  |                                       |                           |
| 2  |                                       |                           |
| 3  |                                       |                           |
| 4  |                                       |                           |
| 5  | Fujiyoshida Municipal Hospital        | Syougo Imae               |
| 6  | Fukaya Red Cross Hospital             | Hirochiyo Wada            |
| 7  |                                       |                           |
| 8  | Fukuchiyama City Hospital             | Mamoru Murakami           |
| 9  |                                       |                           |
| 10 | Fukui Katsuyama General Hospital      | Masanori Kabuto           |
| 11 | Fukuoka Seisyukai Hospital            | Masaharu Tani, Isao Inoue |
| 12 |                                       |                           |
| 13 | Fukuoka Tokushukai Medical Center     | Hidenori Yoshida          |
| 14 |                                       |                           |
| 15 | Fukuoka University Chikushi Hospital  | Kiyoshi Kazekawa          |
| 16 | Fukuoka University Hospital           | Tooru Inoue               |
| 17 |                                       |                           |
| 18 | Fukuoka Wajiro Hospital               | Kouzou Fukuyama           |
| 19 |                                       |                           |
| 20 | Fukuokashinmizumaki Hospital          | Shigenari Kin             |
| 21 | Fukushima Medical University Hospital | Taku Sato                 |
| 22 |                                       |                           |
| 23 | Fukushima Red Cross Hospital          | Yoichi Watanabe           |
| 24 |                                       |                           |
| 25 | Gifu Municipal Hospital               | Tetsuya Tanigawara        |
| 26 | Gifu Prefectural Tajimi Hospital      | Junki Ito                 |
| 27 |                                       |                           |
| 28 | Gifu University Hospital              | Toru Iwama                |
| 29 |                                       |                           |
| 30 | Hachisuga Hospital                    | Yoshihisa Maeda           |
| 31 | Hakodate Central General Hospital     | Makoto Takeda             |
| 32 |                                       |                           |
| 33 | Hakodate Municipal Hospital           | Jun Niwa                  |
| 34 |                                       |                           |
| 35 | Hakodate Neurosurgical Hospital       | Mikio Nishiya             |
| 36 | Hakujuji Hospital                     | Shuji Hayasi              |
| 37 |                                       |                           |
| 38 | Hamamatsu Medical Center              | Teiji Nakayama            |
| 39 |                                       |                           |
| 40 |                                       |                           |
| 41 |                                       |                           |
| 42 |                                       |                           |
| 43 |                                       |                           |
| 44 |                                       |                           |
| 45 |                                       |                           |
| 46 |                                       |                           |

1  
2  
3  
4  
5  
6  
7  
8  
9  
10  
11  
12  
13  
14  
15  
16  
17  
18  
19  
20  
21  
22  
23  
24  
25  
26  
27  
28  
29  
30  
31  
32  
33  
34  
35  
36  
37  
38  
39  
40  
41  
42  
43  
44  
45  
46

|                                                               |                                    |
|---------------------------------------------------------------|------------------------------------|
| Hamanomachi Hospital                                          | Koichirou Matsukado                |
| Harasanshin Hospital                                          | Tadahisa Shono                     |
| Hata Kenmin Hospital                                          | Hiroyuki Nishimura                 |
| Higashiosaka City Medical Center                              | Takatoshi Fujimoto, Ryo Tamaki     |
| Higashitotsuka Memorial Hospital                              | Satoshi Utsuki                     |
| Higashiyamato Hospital                                        | Ikuo Kobayashi, Hirotooshi Ohtaka  |
| Hirosaki Stroke and Rehabilitation Center                     | Takamitsu Uchizawa                 |
| Hirosaki University Hospital                                  | Hiroki Ohkuma                      |
| Hiroshima City Hiroshima Citizens Hospital                    | Shigeki Nishino                    |
| Hiroshima Prefectural Hospital                                | Atsushi Tominaga                   |
| Hiroshima Red Cross Hospital & Atomic Bomb Survivors Hospital | Masayuki Sumida                    |
| Hiroshima University Hospital                                 | Takahito Okazaki, Shirou Aoki      |
| Hito Medical Center                                           | Naoki Shinohara                    |
| Hokkaido Medical Center                                       | Satoshi Ushikoshi                  |
| Hokkaido University Dept. Neurosurgery                        | Syunsuke Terasaka, Kiyohiro Houkin |
| Hokushikai Megumino Hospital                                  | Mitsunobu Kaijima                  |
| Hokuto Hospital                                               | Kimito Kondo, Kazumi Nitta         |
| Hospital                                                      | Toshiki Ikeda, Hidetoshi Ooigawa   |
| Hospital Nanbu Tokushukai                                     | Tutomu Kadokaru                    |
| Hukuoka City Hospital                                         | Katsuyuki Hirakawa                 |
| Hyogo College of Medicine                                     | Shinichi Yoshimura                 |

|    |                                                               |                                   |
|----|---------------------------------------------------------------|-----------------------------------|
| 1  |                                                               |                                   |
| 2  |                                                               |                                   |
| 3  |                                                               |                                   |
| 4  |                                                               |                                   |
| 5  | Hyogo Prefectural Awaji Medical Center                        | Yoshio Sakagami                   |
| 6  | Hyogo Prefectural Kakogawa Medical Center                     | Hideo Aihara                      |
| 7  |                                                               |                                   |
| 8  | Hyogokenritu_Nishinomiya_Hospital                             | Takayuki Sakaki                   |
| 9  |                                                               |                                   |
| 10 | Ibaraki Prefectural Central Hospital                          | Hiroko Oyama, Yuuji Kujiraoka     |
| 11 | Ibaraki Seinan Medical Center Hospital                        | Keishi Fujita                     |
| 12 |                                                               |                                   |
| 13 | Iida Municipal Hospital                                       | Sumio Kobayashi                   |
| 14 |                                                               |                                   |
| 15 | Imari Arita Kyoritsu Hospital                                 | Nobuaki Momozaki                  |
| 16 | Ina Central Hospital                                          | Atsushi Sato                      |
| 17 |                                                               |                                   |
| 18 | Inagi Municipal Hospital                                      | Hideki Murakami, Tatsuo Iwasita   |
| 19 |                                                               |                                   |
| 20 | Institute of Brain and Blood Vessels Mihara Memorial Hospital | Akazi Kazunori, Takao Kanzawa     |
| 21 | Irixyouhoujin Okinawatokushuukai Uwajimatokushukai Hospital   | Hiromichi Sadashima               |
| 22 |                                                               |                                   |
| 23 | Iryohojin Seiwakai Wada Hospital                              | Shiro Miyata                      |
| 24 |                                                               |                                   |
| 25 | Iryouhoujinsyadanjinmeikai Akiyamanousinnkeigeka              | Takekazu Akiyama                  |
| 26 |                                                               |                                   |
| 27 | Iryouhouzinsyadan Meihoukai                                   |                                   |
| 28 | Yokohamashintoshinoushinkeigekabyouin                         | Akihiro Nemoto, Masafumi Morimoto |
| 29 |                                                               |                                   |
| 30 | Isahaya General Hospital                                      | Yoshihiro Nishiura                |
| 31 | Ise Red Cross Hospital                                        | Fumitaka Miya, Masunari Sibata    |
| 32 |                                                               |                                   |
| 33 | Ishikawa Prefectural Central Hospital                         | Yutaka Hayashi                    |
| 34 |                                                               |                                   |
| 35 | Ishinomaki Red Cross Hospital                                 | Syuichi Ishikawa                  |
| 36 |                                                               |                                   |
| 37 | Itabashi Chuo Medical Center                                  | Miura Naohisa                     |
| 38 | Itami Kousei Neurosurgical Hospital                           | Shinya Noda                       |
| 39 |                                                               |                                   |
| 40 |                                                               |                                   |
| 41 |                                                               |                                   |
| 42 |                                                               |                                   |
| 43 |                                                               |                                   |
| 44 |                                                               |                                   |
| 45 |                                                               |                                   |
| 46 |                                                               |                                   |

1  
2  
3  
4  
5  
6  
7  
8  
9  
10  
11  
12  
13  
14  
15  
16  
17  
18  
19  
20  
21  
22  
23  
24  
25  
26  
27  
28  
29  
30  
31  
32  
33  
34  
35  
36  
37  
38  
39  
40  
41  
42  
43  
44  
45  
46

|                                                                               |                                   |
|-------------------------------------------------------------------------------|-----------------------------------|
| Iwaki Kyoritsu General Hospital                                               | Yasuhiro Suzuki                   |
| Iwata Municipal General Hospital                                              | Shinji Amano                      |
| Iwate Medical University                                                      | Kuniaki Ogasawara                 |
| Iwate Prefectural Central Hospital                                            | Takayuki Sugawara                 |
| Iwate Prefectural Iwai Hospital                                               | Keiichi Saitou                    |
| Iwate Prefectural Kuji Hospital                                               | Kazuyuki Miura                    |
| Iwate Prefectural Ninohe Hospital                                             | Akinori Yabuta                    |
| Izumi Hospital                                                                | Makoto Hasebe                     |
| Izumino Hospital                                                              | Masato Seike                      |
| Japan Community Health Care Organization Chukyo Hospital                      | Akira Ikeda                       |
| Japan Community Health Care Organization Kyushu Hospital                      | Satoshi Inoha                     |
| Japan Community Health Care Organization Tokyo Takanawa Hospital              | Hirofumi Hiyama                   |
| Japan Organization of Occupational Health and Safety Kumamoto Rousai Hospital | Hiromasa Tsuiki, Shigeo Yamashiro |
| Japanese Red Cross Akita Hospital                                             | Keiichi Nishimaki                 |
| Japanese Red Cross Asahikawa Hospital                                         | Katsumi Takizawa, Kenichi Makino  |
| Japanese Red Cross Fukuoka Hospital                                           | Hitoshi Tsugu, Jiro Kitayama      |
| Japanese Red Cross Kitami Hospital                                            | Nozomi Suzuki                     |
| Japanese Red Cross Kumamoto Hospital                                          | Shu Hasegawa, Tadashi Terasaki    |
| Japanese Red Cross Maebashi Hospital                                          | Ken Asakura                       |



|    |                                               |                            |
|----|-----------------------------------------------|----------------------------|
| 1  |                                               |                            |
| 2  |                                               |                            |
| 3  |                                               |                            |
| 4  |                                               |                            |
| 5  | Japanese Red Cross Medical Center             | Ichiro Suzuki              |
| 6  | Japanese Red Cross Society Hachinohe Hospital | Hiromu Konno               |
| 7  |                                               |                            |
| 8  | Japanese Red Cross Takayama Hospital          | Katsunobu Takenaka         |
| 9  |                                               |                            |
| 10 | Japanese Redcross Fukui Hospital              | Hiroki Toda, Taketo Hatano |
| 11 | Jcho Hitoyoshi Medical Center                 | Keizou Yamamoto            |
| 12 |                                               |                            |
| 13 | Jcho Kobe Central Hospital                    | Keigo Matsumoto            |
| 14 |                                               |                            |
| 15 | Jcho Kumamoto General Hospital                | Kazunari Koga              |
| 16 | Jcho Nankai Medical Center                    | Takamitu Hikawa            |
| 17 |                                               |                            |
| 18 | Juntendo Universty Hospital                   | Hajime Arai                |
| 19 |                                               |                            |
| 20 | Kaetsu Hospital                               | Kazuaki Awamori            |
| 21 | Kaga Medical Center                           | Naoki Shirasaki            |
| 22 |                                               |                            |
| 23 | Kagawa Rosai Hospital                         | Kimihiro Yoshino           |
| 24 |                                               |                            |
| 25 | Kagawa University Hospital                    | Takashi Tamiya             |
| 26 | Kagoshima City Hospital                       | Kazuho Hirahara            |
| 27 |                                               |                            |
| 28 | Kagoshima Prefectural Kanoya Medical Center   | Shunichi Tanaka            |
| 29 |                                               |                            |
| 30 | Kagoshima Tokushukai Hospital                 | Teruaki Kawano             |
| 31 | Kagoshima University Hospital                 | Sei Sugata, Kazunori Arita |
| 32 |                                               |                            |
| 33 | Kan-Etsu Hospital                             | Masahiko Tanaka            |
| 34 |                                               |                            |
| 35 | Kanazawa Medical Univercity                   | Shunsuke Shiraga           |
| 36 | Kanazawa Neurosurgical Hospital               | Syuji Sato                 |
| 37 |                                               |                            |
| 38 | Kanazawa University Hospital                  | Mitsutoshi Nakada          |
| 39 |                                               |                            |
| 40 |                                               |                            |
| 41 |                                               |                            |
| 42 |                                               |                            |
| 43 |                                               |                            |
| 44 |                                               |                            |
| 45 |                                               |                            |
| 46 |                                               |                            |

1  
2  
3  
4  
5  
6  
7  
8  
9  
10  
11  
12  
13  
14  
15  
16  
17  
18  
19  
20  
21  
22  
23  
24  
25  
26  
27  
28  
29  
30  
31  
32  
33  
34  
35  
36  
37  
38  
39  
40  
41  
42  
43  
44  
45  
46

Kaneda Hospital  
Kanmon Medical Center  
Kano Hospital  
Kansai Electric Power Hospital  
Kansai Medical University Hospital  
Kanto Rosai Hospital  
Kasaoka Daiichi Hospital  
Kashiwaba Neurosurgical Hospital  
Kasugai Municipal Hospital  
Kawasaki Medical School Hospital  
Kazuno Kosei Hospital  
Keiju Medical Center  
Keishunkai Medical Corporation Kobari General Hospital  
Kenwakai Hospital  
Kenwakai Otemati Hospital  
Kieikai Hospital  
Kindai University Hospital  
Kindai University Sakai Hospital  
Kiryu Kosei General Hospital  
Kishiwada City Hospital  
Kishiwada Tokushukai Hospital

Kimihisa Kinoshita  
Katsuhiro Yamashita  
Nakazawa Kazutomo  
Yasuhiro Fujimoto  
Kunikazu Yoshimura  
Takayuki Tachizawa  
Akira Watanabe  
Tetsuyuki Yoshimoto  
Naoto Kuwayama  
Masaaki Uno  
Masayuki Sasou  
Sotaro Higashi  
Naoaki Sato  
Masakazu Kitahara  
Hiroshi Yoneda  
Satoshi Suzuki  
Toshiho Ohtsuki, Amami Kato  
Yusaku Nakamura  
Satoshi Magarisawa  
Kenji Hashimoto  
Hiroyuki Matsumoto

For peer review only

|    |                                           |                                      |
|----|-------------------------------------------|--------------------------------------|
| 1  |                                           |                                      |
| 2  |                                           |                                      |
| 3  |                                           |                                      |
| 4  |                                           |                                      |
| 5  | Kita-Harima Medical Center                | Hirotooshi Hamaguchi, Shigeru Miyake |
| 6  | Kitakami Saiseikai Hospital               | Tomohiko Satou                       |
| 7  |                                           |                                      |
| 8  | Kitakyusyu General Hospital               | Masaru Idei                          |
| 9  |                                           |                                      |
| 10 | Kitakyusyu Municipal Medical Center       | Masahiro Mizoguchi                   |
| 11 | Kitamura Hospital                         | Eiichiro Kamatsuka                   |
| 12 |                                           |                                      |
| 13 | Kitasato University School of Medicine    | Toshihiro Kumabe                     |
| 14 |                                           |                                      |
| 15 | Kobe City Medical Center General Hospital | Nobuyuki Sakai                       |
| 16 | Kobe Ekisaikai Hospital                   | Takashi Tominaga                     |
| 17 |                                           |                                      |
| 18 | Kobe Red Cross Hospital                   | Haruo Yamashita                      |
| 19 |                                           |                                      |
| 20 | Kobe University Hospital                  | Eiji Kohmura, Tatsushi Toda          |
| 21 | Kochi Health Sciences Center              | Tsuyoshi Oota, Masanori Morimoto     |
| 22 |                                           |                                      |
| 23 | Kochi Medical School Hospital             | Tetsuya Ueba                         |
| 24 |                                           |                                      |
| 25 | Kohka Public Hospital                     | Kazuyoshi Watanabe                   |
| 26 | Kohnan Hospital                           | Hidenori Endo                        |
| 27 |                                           |                                      |
| 28 | Kohsei General Hospital                   | Kenjiro Hujiiwara, Minoru Nakagawa   |
| 29 |                                           |                                      |
| 30 | Kokura Memorial Hospital                  | Taketo Hatano, Akira Ishii           |
| 31 | Komaki City Hospital                      | Toshinori Hasegawa                   |
| 32 |                                           |                                      |
| 33 | Komatsu Municipal Hospital                | Hisashi Nitta                        |
| 34 |                                           |                                      |
| 35 | Komoro Kosei General Hospital             | Takayuki Kuroyanagi                  |
| 36 | Koshigaya Municipal Hospital              | Akira Tunoda                         |
| 37 |                                           |                                      |
| 38 | Koto Memorial Hospital                    | Hisao Hirai                          |
| 39 |                                           |                                      |
| 40 |                                           |                                      |
| 41 |                                           |                                      |
| 42 |                                           |                                      |
| 43 |                                           |                                      |
| 44 |                                           |                                      |
| 45 |                                           |                                      |
| 46 |                                           |                                      |

1  
2  
3  
4  
5  
6  
7  
8  
9  
10  
11  
12  
13  
14  
15  
16  
17  
18  
19  
20  
21  
22  
23  
24  
25  
26  
27  
28  
29  
30  
31  
32  
33  
34  
35  
36  
37  
38  
39  
40  
41  
42  
43  
44  
45  
46

Koyama Memorial Hospital  
Kugayama Hospital  
Kumamoto City Hospital  
Kurashiki Central Hospital  
Kurashiki Heisei Hospital  
Kurosawa Hospital  
Kurosishi General Hospital  
Kurosu Hospital  
Kurume University Hospital  
  
Kyorin University Hospital  
Kyoritsu Hospital  
Kyoto Okamoto Memorial Hospital  
Kyoto Second Red Cross Hospital  
Kyoto Univerisity Hospital  
Kyoto Yamashiro General Medical Center  
Kyotokatsura Hospital  
Kyotomin-Iren Chuohospital  
Kyushu Central Hospital of The Mutual Aid Association of Public  
School Teachers  
Kyushu Rosai Hospital

Takuya Kawai  
Mitsuyuki Fujitsuka  
Akira Takada, Seiji Tajiri  
Masaki Chin  
Hidemiti Sasayama  
Sigehiro Ohmori  
Seiko Hasegawa  
Kazuhiro Kikuchi, Mikio Teduka  
Motohiro Morioka  
Yoshiko Unno, Hiroki Yoshida , Teruyuki  
Hirano  
Masayuki Yokota  
Minoru Kidooka  
Hiroshi Tenjin  
Susumu Miyamoto  
Yoshihiro Iwamoto  
Yasumasa Yamamoto  
Yuko Shikata  
  
Hitonori Takaba  
Sei Haga

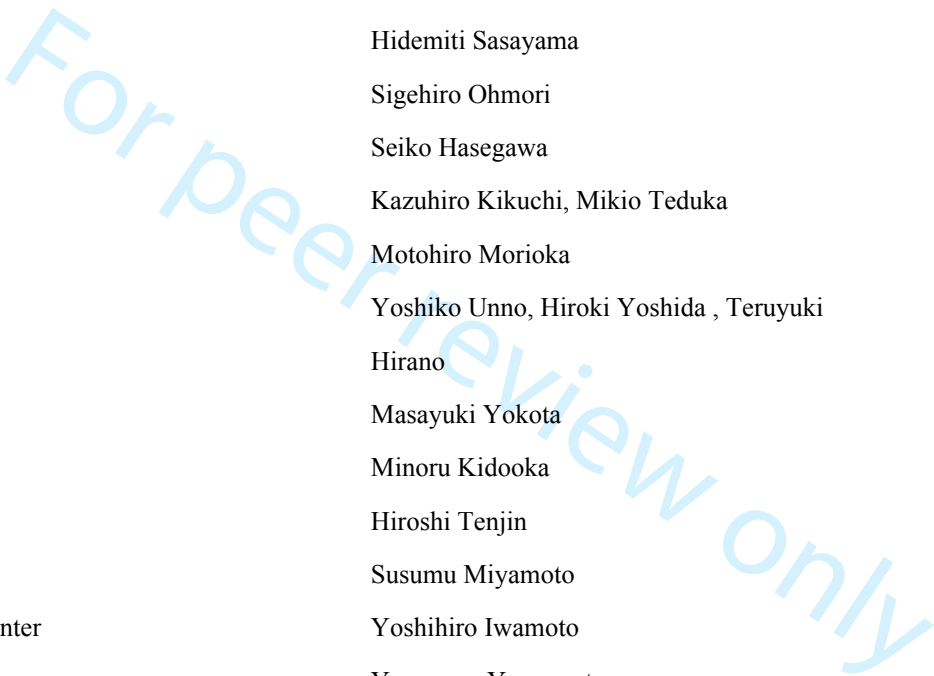

|    |                                                                    |                    |
|----|--------------------------------------------------------------------|--------------------|
| 1  |                                                                    |                    |
| 2  |                                                                    |                    |
| 3  |                                                                    |                    |
| 4  |                                                                    |                    |
| 5  | Kyushu University Hospital                                         | Koji Iihara        |
| 6  | Local Incorporated Administrative Agency Tokushima Prefecture      |                    |
| 7  |                                                                    |                    |
| 8  | Naruto Hospital                                                    | Masahito Agawa     |
| 9  |                                                                    |                    |
| 10 | Makita General Hospital                                            | Yoshinori Arai     |
| 11 |                                                                    |                    |
| 12 | Maruko Central Hospital                                            | Toshiyuki Tsukada  |
| 13 |                                                                    |                    |
| 14 | Matsushita Memorial Hospital                                       | Nozomu Murai       |
| 15 |                                                                    |                    |
| 16 | Matsuyama Shimin Hospital                                          | Masakazu Suga      |
| 17 |                                                                    |                    |
| 18 | Mazda Hospital                                                     | Kawamoto Yukihiko  |
| 19 |                                                                    |                    |
| 20 | Medical Corporation Ijinkai Nakamura Memorial Hospital             | Kenji Kamiyama     |
| 21 |                                                                    |                    |
| 22 | Medical Corporation Meiseikai Abashiri Neurosurgicalrehabilitation |                    |
| 23 | Hospital                                                           | Naoto Izumi        |
| 24 |                                                                    |                    |
| 25 | Meitetsu Hospital                                                  | Youtarou Takeuchi  |
| 26 |                                                                    |                    |
| 27 | Midorigaoka Hospital                                               | Motohiro Arai      |
| 28 |                                                                    |                    |
| 29 | Mie University Hospital                                            | Hidenori Suzuki    |
| 30 |                                                                    |                    |
| 31 | Mimihara General Hospital                                          | Shinji Okumura     |
| 32 |                                                                    |                    |
| 33 | Minamata City General Hospital and Medical Center                  | Makoto Yoshikawa   |
| 34 |                                                                    |                    |
| 35 | Minami Wakayama Medical Center                                     | Yoshinari Nakamura |
| 36 |                                                                    |                    |
| 37 | Minato Medical Coop-Kyoritsu General Hospital                      | Hisashi Tanaka     |
| 38 |                                                                    |                    |
| 39 | Mito Kyodo General Hospital                                        | Yasusi Sibata      |
| 40 |                                                                    |                    |
| 41 | Mitoyogeneralhospital                                              | Tetsuya Masaoka    |
| 42 |                                                                    |                    |
| 43 | Mitsugi General Hospital                                           | Takashi Matsuoka   |
| 44 |                                                                    |                    |
| 45 |                                                                    |                    |
| 46 |                                                                    |                    |

1  
2  
3  
4  
5  
6  
7  
8  
9  
10  
11  
12  
13  
14  
15  
16  
17  
18  
19  
20  
21  
22  
23  
24  
25  
26  
27  
28  
29  
30  
31  
32  
33  
34  
35  
36  
37  
38  
39  
40  
41  
42  
43  
44  
45  
46

Miyakonojo Medical Association Hospital

Hajime Ohta

Miyoshi Central Hospital

Osamu Hamasaki

Moriguchi-Ikuno Memorial Hospital

Misao Nishikawa

Morioka Red Cross Hospital

Naohiko Kubo

Munakata Suikokai General Hospital

Yosimasa Kinoshita

Muroran City General Hospital

Hiroshi Ooyama

Nagahama City Hospital

Taro Komuro

Nagano Municipal Hospital

Yoshikazu Kusano

Nagaoka Chuo General Hospital

Shigekazu Takeuchi

Nagasaki Kawatana Medical Center

Ei-Ichirou Urasaki

Nagasaki University Hospital

Takayuki Matsuo

Nagasaki Shimabara Hospital

Yoshiharu Tokunaga

Nagoya City University

Mitsuhiro Mase

Nagoya Daini Red Cross Hospital

Yukio Seki, Keizo Yasui

Nagoya University Hospital

Yoshio Araki

Naha City Hospital

Naoki Tomiyama

Nakamura Memorial South Hospital

Taiichiro Watanabe, Koji Oka

Nakatsu Municipal Hospital

Hiromichi Koga

Nara Medical University

Hiroyuki Nakase

Narita Red Cross Hospital

Michio Nakamura

National Cerebral and Cardiovascular Center

Jun Takahashi

|    |                                                           |                               |
|----|-----------------------------------------------------------|-------------------------------|
| 1  |                                                           |                               |
| 2  |                                                           |                               |
| 3  |                                                           |                               |
| 4  |                                                           |                               |
| 5  | National Hospital Organization Chiba Medical Center       | Hirokazu Tanno                |
| 6  | National Hospital Organization Hamada Medical Center      | Takato Kagawa                 |
| 7  |                                                           |                               |
| 8  | National Hospital Organization Himeji Medical Center      | Osamu Narumi                  |
| 9  |                                                           |                               |
| 10 | National Hospital Organization Kyushu Medical Center      | Akira Nakamizo, Shinji Nagata |
| 11 | National Hospital Organization Nagoya Medical Center      | Noriyuki Suzaki               |
| 12 |                                                           |                               |
| 13 | National Hospital Organization Okayama Medical Center     | Yoichiro Namba                |
| 14 |                                                           |                               |
| 15 | National Hospital Organization Osakaminami Medical Center | Tomonori Yamada               |
| 16 | National Hospital Organization Tochigi Medical Center     | Masayuki Ishihara             |
| 17 |                                                           |                               |
| 18 | National Hospital Organization Toyohashi Medical Center   | Hideki Sakai                  |
| 19 |                                                           |                               |
| 20 | National Hospital Organization Ureshino Medical Center    | Masayuki Miyazono             |
| 21 | National Hospital Organization, Iwakuni Clinical Center   | Kotaro Ogihara                |
| 22 |                                                           |                               |
| 23 | Nayoro City Hospital                                      | Naoki Tokumitsu               |
| 24 |                                                           |                               |
| 25 | Nho Sendai Medical Center                                 | Masayuki Ezura                |
| 26 |                                                           |                               |
| 27 | Nho Shinshu Ueda Medical Center                           | Keiichi Sakai                 |
| 28 |                                                           |                               |
| 29 | Nihon University Itabashi Hospital                        | Atsuo Yoshino                 |
| 30 |                                                           |                               |
| 31 | Niigata City General Hospital                             | Kenichi Morita, Akihiko Saito |
| 32 |                                                           |                               |
| 33 | Niigata Prefectural Central Hospital                      | Igarashi Michitoku            |
| 34 |                                                           |                               |
| 35 | Niigata Tokamachi Hospital                                | Mitsuo Kouno                  |
| 36 |                                                           |                               |
| 37 | Niigata University Medical and Dental Hospital            | Yukihiko Fujii, Osamu Onodera |
| 38 |                                                           |                               |
| 39 | Niigatanougekabyouin                                      | Kiyoshi Onda                  |
| 40 |                                                           |                               |
| 41 | Nishikobe Medical Center                                  | Naoya Takeda                  |
| 42 |                                                           |                               |
| 43 |                                                           |                               |
| 44 |                                                           |                               |
| 45 |                                                           |                               |
| 46 |                                                           |                               |

1  
2  
3  
4  
5  
6  
7  
8  
9  
10  
11  
12  
13  
14  
15  
16  
17  
18  
19  
20  
21  
22  
23  
24  
25  
26  
27  
28  
29  
30  
31  
32  
33  
34  
35  
36  
37  
38  
39  
40  
41  
42  
43  
44  
45  
46

|                                             |                                  |
|---------------------------------------------|----------------------------------|
| Nishinomiya Kyoritsu Neurosurgical Hospital | Hiroji Miyake                    |
| Nishio Municipal Hospital                   | Toshio Yokoe                     |
| Nishitokyo Central General Hospital         | Tatsuya Nakamura                 |
| Nissan Tamagawa Hospital                    | Takayuki Kubodera                |
| Nitobe Memorial Nakano General Hospital     | Mitsuhiro Hokari                 |
| Noshiro Kosei Medical Center                | Yasunari Otawara                 |
| Noto General Hospital                       | Cheho Park                       |
| Nozaki Tokushukai Hospital                  | Hidemitsu Nakagawa               |
| Obara Hospital                              | Souichi Obara                    |
| Obase Hospital                              | Haruki Takahashi                 |
| Obihiro Kosei General Hospital              | Masafumi Ohtaki                  |
| Odate Municipal General Hospital            | Atsuya Okubo                     |
| Ogaki Tokushukai Hospital                   | Katsuhiko Hayashi                |
| Ohnishi Neurological Center                 | Hideyuki Ohnishi, Yoshihiro Kuga |
| Ohta Nishinouchi Hospital                   | Masahisa Kawakami                |
| Oita Prefectural Hospital                   | Yu Takeda                        |
| Oitaken Koseiren Tsurumi Hospital           | Akihiko Kaga                     |
| Okaya City Hospital                         | Ryoichi Hayashi                  |
| Okayama City Hospital                       | Koji Tokunaga                    |
| Okayama Kyokuto Hospital                    | Hiroyuki Nakashima               |
| Okayama University Hospital                 | Isao Date                        |



|    |                                                                 |                                              |
|----|-----------------------------------------------------------------|----------------------------------------------|
| 1  |                                                                 |                                              |
| 2  |                                                                 |                                              |
| 3  |                                                                 |                                              |
| 4  |                                                                 |                                              |
| 5  | Okinawa Kyodo Hospital                                          | Koji Idomari, Nobuyuki Kaneko                |
| 6  | Okinawa Prefectural Nanbu Medical Center and Children's Medical |                                              |
| 7  | Center                                                          | Tomoaki Naganine                             |
| 8  |                                                                 |                                              |
| 9  | Okitama Public General Hospital                                 | Toshihiko Kinjo                              |
| 10 |                                                                 |                                              |
| 11 | Ome Municipal General Hospital                                  | Yoshiaki Takada, Osamu Tao                   |
| 12 |                                                                 |                                              |
| 13 | Omihachiman Community Medical Center                            | Masayuki Nakajima                            |
| 14 |                                                                 |                                              |
| 15 | Omori Red Cross Hospital                                        | Akira Isoshima                               |
| 16 |                                                                 |                                              |
| 17 | Omuta City Hospital                                             | Terukazu Kuramoto                            |
| 18 |                                                                 |                                              |
| 19 | Onomichi Municipal Hospital                                     | Shigeru Daido                                |
| 20 |                                                                 |                                              |
| 21 | Osaka Medical College                                           | Toshihiko Kuroiwa                            |
| 22 |                                                                 |                                              |
| 23 | Osaka National Hospital                                         | Kazuo Hashikawa                              |
| 24 |                                                                 |                                              |
| 25 | Osaka Neurological Institute                                    | Akatsuki Wakayama                            |
| 26 |                                                                 |                                              |
| 27 | Osaka Neurosurgical Hospital                                    | Naoki Hayashi                                |
| 28 |                                                                 |                                              |
| 29 | Osaka University Hospital                                       | Kouich Iwatsuki, Toshiki Yoshimine           |
| 30 |                                                                 |                                              |
| 31 | Osaki Citizen Hospital                                          | Masahiro Yoshida                             |
| 32 |                                                                 |                                              |
| 33 | Otaru General Hospital                                          | Yoshimasa Niiya                              |
| 34 |                                                                 |                                              |
| 35 | Otsu City Hospital                                              | Motohiro Takayama                            |
| 36 |                                                                 |                                              |
| 37 | Otsu Red Cross Hospital                                         | Masaaki Saiki                                |
| 38 |                                                                 |                                              |
| 39 | Rakuwakaiotowa Hospital                                         | Kazuo Yamamoto                               |
| 40 |                                                                 |                                              |
| 41 | Research Institute For Brain and Blood Vessels-Akita            | Junta Moroi, Taizen Nakase, Tatsuya Ishikawa |
| 42 |                                                                 |                                              |
| 43 | Saga-Ken Medical Centre Koseikan                                | Shuji Sakata, Hiroshi Sugimori               |
| 44 |                                                                 |                                              |
| 45 |                                                                 |                                              |
| 46 |                                                                 |                                              |

1  
2  
3  
4  
5  
6  
7  
8  
9  
10  
11  
12  
13  
14  
15  
16  
17  
18  
19  
20  
21  
22  
23  
24  
25  
26  
27  
28  
29  
30  
31  
32  
33  
34  
35  
36  
37  
38  
39  
40  
41  
42  
43  
44  
45  
46

|                                            |                                  |
|--------------------------------------------|----------------------------------|
| Saiseikai Futsukaichi Hospital             | Naoko Fujimura                   |
| Saiseikai Imabari Hospital                 | Osamu Nishizaki                  |
| Saiseikai Kumamoto Hospital                | Toru Nishi                       |
| Saiseikai Kurihashi Hospital               | Hiroshi Wanihuti                 |
| Saiseikai Kyoto Hospital                   | Nobukuni Murakami                |
| Saiseikai Matsusaka General Hospital       | Hiroto Murata                    |
| Saiseikai Nagasaki Hospital                | Wataru Haraguchi                 |
| Saiseikai Toyama Hospital                  | Yukio Horie                      |
| Saiseikai Yahata General Hospital          | Yuji Okamoto                     |
| Saiseikai Yokohamashi Tobu Hospital        | Makoto Inaba                     |
| Saiseikaiustunomiya Hospital               | Masashi Nakatsukasa              |
| Saitama City Hospital                      | Atsuhiko Kojima                  |
| Saitama Medical Center                     | Kyoichi Nomura                   |
| Saitama Red Cross Hosoi Hospital           | Toshie, Yamamoto Kenji Takahashi |
| Sakai City Medical Center                  | Yoshikazu Nakajima               |
| Saku Central Hospital Advanced Care Center | Takaaki Yoshida                  |
| Sanyudohospital                            | Yohei Kudoh                      |
| Sapporo Azabu Neurosurgical Hospital       | Toshitaka Nakamura               |
| Sapporo Medical University Hospital        | Nobuhiro Mikuni                  |
| Sapporo Shiroishi Memorial Hospital        | Akira Takahashi                  |
| Sapporoteishinkaihospital                  | Rokuya Tanikawa                  |

|    |                                                |                                    |
|----|------------------------------------------------|------------------------------------|
| 1  |                                                |                                    |
| 2  |                                                |                                    |
| 3  |                                                |                                    |
| 4  |                                                |                                    |
| 5  | Sasebo Chuo Hospital                           | Seisaburo Sakamoto                 |
| 6  | Secomedic Hospital                             | Seiichiro Hoshi                    |
| 7  |                                                |                                    |
| 8  | Seikeikai Hospital                             | Yoshinari Okumura                  |
| 9  |                                                |                                    |
| 10 | Seirei Memorial Hospital                       | Sinichi Okabe                      |
| 11 | Seirei Mikatahara General Hospital             | Haruhiko Sato                      |
| 12 |                                                |                                    |
| 13 | Sendai City Hospital                           | Hiroshi Karibe                     |
| 14 |                                                |                                    |
| 15 | Shakaiiryohoujinzaidanshinwakaiyachiyobyuin    | Takashi Inoue                      |
| 16 | Shikoku Medical Center For Children and Adults | Kazuyuki Kuwayama                  |
| 17 |                                                |                                    |
| 18 | Shimane Prefectural Central Hospital           | Tatsuya Mizoue                     |
| 19 |                                                |                                    |
| 20 | Shimizu Hospital                               | Takashi Yoshida                    |
| 21 | Shimonoseki City Hospital                      | Takaharu Nakamura                  |
| 22 |                                                |                                    |
| 23 | Shin Koga Hospital                             | Tsutomu Hitotsumatsu               |
| 24 |                                                |                                    |
| 25 | Shin-Oyama City Hospital                       | Tomoaki Kameda                     |
| 26 | Shingu Municipal Medical Center                | Mitsukazu Nakai, Hiroshi Ishiguchi |
| 27 |                                                |                                    |
| 28 | Shinonoi General Hosapital                     | Masanobu Hokama                    |
| 29 |                                                |                                    |
| 30 | Shinsapporo Neurosurgical Hospital             | Akinori Yamamura                   |
| 31 | Shinshu University Hospital                    | Kazuhiro Hongo                     |
| 32 |                                                |                                    |
| 33 | Shinsuma General Hospital                      | Takeshi Kondoh                     |
| 34 |                                                |                                    |
| 35 | Shintakeohospital                              | Makoto Ichinose                    |
| 36 | Shizuoka Children's Hospital                   | Yuzuru Tashiro                     |
| 37 |                                                |                                    |
| 38 | Shizuoka City Shizuoka Hospital                | Seiji Fukazawa                     |
| 39 |                                                |                                    |
| 40 |                                                |                                    |
| 41 |                                                |                                    |
| 42 |                                                |                                    |
| 43 |                                                |                                    |
| 44 |                                                |                                    |
| 45 |                                                |                                    |
| 46 |                                                |                                    |

1  
2  
3  
4  
5  
6  
7  
8  
9  
10  
11  
12  
13  
14  
15  
16  
17  
18  
19  
20  
21  
22  
23  
24  
25  
26  
27  
28  
29  
30  
31  
32  
33  
34  
35  
36  
37  
38  
39  
40  
41  
42  
43  
44  
45  
46

|                                                                                     |                                  |
|-------------------------------------------------------------------------------------|----------------------------------|
| Shonan Kamakura General Hospital                                                    | Takahisa Mori                    |
| Showa Inan General Hospital                                                         | Shinsuke Muraoka                 |
| Showa University Fujigaoka Hospital                                                 | Tomoaki Terada                   |
| Shuuwa General Hospital                                                             | Tsuneo Shishido                  |
| Social Welfare Organization Saiseikai Imperial Gift Foundation Inc.                 |                                  |
| Osaka Saiseikai Ibaraki Hospital                                                    | Yasunobu Gotou                   |
| Social Welfare Organization Saiseikai Imperial Gift Foundation Inc. Yamagata Saisei | Sunao Takemura                   |
| South Miyagi Medical Center                                                         | Hiroaki Arai                     |
| Southern Tohoku Hospital                                                            | Zenichiro Watanabe               |
| St. Marianna University School of Medicine                                          | Yuichiro Tanaka                  |
| St. Luke's International Hospital                                                   | Yasunari Niimi                   |
| Steel Memorial Yawata Hospital                                                      | Shinya Yamaguchi, Akira Nakamizo |
| Suiseikai Kajikawa Hospital                                                         | Shinichi Wakabayashi             |
| Suwa Central Hospital                                                               | Hiroki Sato                      |
| Suwa Red Cross Hospital                                                             | Yukinari Kakizawa                |
| Syakaiiryohouzin Kouseikai Takai Hospital                                           | Tetsuya Morimoto                 |
| Tachibana Medical Corporation Higashisumiyoshi Morimoto Hospital                    | Naofumi Isono                    |
| Tachikawa General Hospital                                                          | Hiroki Takano, Hiroshi Abe       |
| Takamatsu Municipal Hospital                                                        | Norihito Shirakawa               |
| Takamatsu Red Cross Hospital                                                        | Masahiro Kagawa                  |

|    |                                                |                                   |
|----|------------------------------------------------|-----------------------------------|
| 1  |                                                |                                   |
| 2  |                                                |                                   |
| 3  |                                                |                                   |
| 4  |                                                |                                   |
| 5  | Takarazuka City Hospital                       | Eiichiro Mabuchi                  |
| 6  | Takarazuka Daiichi Hospital                    | -                                 |
| 7  |                                                |                                   |
| 8  | Takatsuki General Hospital                     | Kazusige Maeno                    |
| 9  |                                                |                                   |
| 10 | Takeda General Hospital Organization           | Takayuki Koizmi                   |
| 11 | Takeda Hospital                                | Waro Taki                         |
| 12 |                                                |                                   |
| 13 | Takikawa Neurosurgical Hospital                | Yusuke Nakagaki                   |
| 14 |                                                |                                   |
| 15 | Tanushimaru Central Hospital                   | Yoshihisa Matumoto                |
| 16 | Teinekeijinkai Hospital                        | Katuyuki Asaoka                   |
| 17 |                                                |                                   |
| 18 | Tenri Hospital                                 | Yoshinori Akiyama                 |
| 19 |                                                |                                   |
| 20 | Tenshindo Hetsugi Hospital                     | Tadao Kawamura                    |
| 21 |                                                |                                   |
| 22 | Teraoka Memorial Hospital                      | Atumi Takenobu                    |
| 23 | The Veritas Hospital                           | Masayuki Yokota                   |
| 24 |                                                |                                   |
| 25 | Tobata Kyoritu Hospital                        | Taketoshi Tuji                    |
| 26 |                                                |                                   |
| 27 | Tohoku University Hospital                     | Teiji Tominaga                    |
| 28 | Tokai University Hachioji Hospital             | Shigeru Nogawa, Masami Shimoda    |
| 29 |                                                |                                   |
| 30 | Toki General Hospital                          | Sinji Noda                        |
| 31 |                                                |                                   |
| 32 | Tokushima Red Cross Hospital                   | Hajimu Miyake                     |
| 33 | Tokushima University Hospital                  | Shinji Nagahiro, Junichiro Satomi |
| 34 |                                                |                                   |
| 35 | Tokuyama Central Hospital                      | Kunihiko Harada                   |
| 36 |                                                |                                   |
| 37 | Tokyo Dental College Ichikawa General Hospital | Sadao Suga                        |
| 38 | Tokyo General Hospital                         | Shinichi Numazawa                 |
| 39 |                                                |                                   |
| 40 |                                                |                                   |
| 41 |                                                |                                   |
| 42 |                                                |                                   |
| 43 |                                                |                                   |
| 44 |                                                |                                   |
| 45 |                                                |                                   |
| 46 |                                                |                                   |

1  
2  
3  
4  
5  
6  
7  
8  
9  
10  
11  
12  
13  
14  
15  
16  
17  
18  
19  
20  
21  
22  
23  
24  
25  
26  
27  
28  
29  
30  
31  
32  
33  
34  
35  
36  
37  
38  
39  
40  
41  
42  
43  
44  
45  
46

|                                                                    |                                      |
|--------------------------------------------------------------------|--------------------------------------|
| Tokyo Medical and Dental University                                | Taketoshi Maehara                    |
| Tokyo Medical University Hachioji Medical Center                   | Hiroyuki Jimbo, Jyunya Tsurukiri     |
| Tokyo Medical University Hospital                                  | Michihiro Kohno                      |
| Tokyo Metropolitan Hiroo Hospital                                  | Kensaku Yoshida                      |
| Tokyo Metropolitan Geriatric Hospital and Institute of Gerontology | Koji Matuoka                         |
| Tokyo Metropolitan Tama Medical Center                             | Takahiro Ota                         |
| Tokyo Saiseikai Central Hospital                                   | Haruhiko Hoshino                     |
| Tokyo Teisin Hospital                                              | Makoto Noguchi                       |
| Tokyo Women's Medical University                                   | Takakazu Kawamata                    |
| Tokyo Yamate Medical Center                                        | Yasuaki Takeda                       |
| Tomakomaihigashi Hospital                                          | Youichi Hashimoto                    |
| Tomei Atsugi Hopital                                               | Keiichirou Onitsuka                  |
| Tominaga Hospital                                                  | Masahiko Kitano                      |
| Tomishiro Central Hospital                                         | Jae-Hyun Son                         |
| Tottori Municipal Hospital                                         | Keiichi Akatsuka                     |
| Tottori University                                                 | Masamichi Kurosaki, Takashi Watanabe |
| Toyama City Hospital                                               | Miyamori Tadao                       |
| Toyama Prefectural Central Hospital                                | Hiroaki Hondo                        |
| Toyama Red Cross Hospital                                          | Kazumasa Yamatani, Kotaro Tsumura    |
| Toyama University Hospital                                         | Satoshi Kuroda                       |
| Toyohashi Municipal Hospital                                       | Hirofumi Oyama                       |

|    |                                                          |                                          |
|----|----------------------------------------------------------|------------------------------------------|
| 1  |                                                          |                                          |
| 2  |                                                          |                                          |
| 3  |                                                          |                                          |
| 4  |                                                          |                                          |
| 5  | Toyokawa City Hospital                                   | Takayuki Watanabe                        |
| 6  | Toyooka Hospital                                         | Kazuhiro Tanaka                          |
| 7  |                                                          |                                          |
| 8  | Tsuchiura Kyodo General Hospital                         | Shinji Yamamoto                          |
| 9  |                                                          |                                          |
| 10 | Tsukuba Medical Center Hospital                          | Kazuya Uemura                            |
| 11 | Tsuruoka Municipal Shonai Hospital                       | Hirosi Maruya, Kazuhiko Sato             |
| 12 |                                                          |                                          |
| 13 | Tsutiura Kyodo Hospital Namegata District Medical Center | Hitoshi Tabata                           |
| 14 |                                                          |                                          |
| 15 | Tsuyama Chuo Hospital                                    | Hideyuki Yoshida                         |
| 16 | Tyuubu Rousai Hospital                                   | Noriaki Matubara                         |
| 17 |                                                          |                                          |
| 18 | Ube Kohsan Industries Hospital                           | Takafumi Nishizaki                       |
| 19 |                                                          |                                          |
| 20 | Uki General Hospital                                     | Hiroshi Egami                            |
| 21 | University of Fukui Hospital                             | Osamu Yamamura                           |
| 22 |                                                          |                                          |
| 23 | University of Occupational and Environmental Health      | Junkoh Yamamoto                          |
| 24 |                                                          |                                          |
| 25 | University of The Ryukyus Hospital                       | Shogo Ishiuchi                           |
| 26 |                                                          |                                          |
| 27 |                                                          | Yuji Matsumaru, Akira Matsumura, Tetsuya |
| 28 | University of Tsukuba Hospital                           | Yamamoto                                 |
| 29 |                                                          |                                          |
| 30 | University of Yamanashi                                  | Hiroyuki Kinouchi                        |
| 31 |                                                          |                                          |
| 32 | Urasoe General Hospital                                  | Susumu Mearu                             |
| 33 |                                                          |                                          |
| 34 | Ushioda General Hospital                                 | Hitoshi Ozawa                            |
| 35 | Uwajima City Hospital                                    | Kiichiro Zenke                           |
| 36 |                                                          |                                          |
| 37 | Wakayama Medical University Hospital                     | Naoyuki Nakao                            |
| 38 | Wakayama Rosai Hospital                                  | Toshikazu Kuwata                         |
| 39 |                                                          |                                          |
| 40 |                                                          |                                          |
| 41 |                                                          |                                          |
| 42 |                                                          |                                          |
| 43 |                                                          |                                          |
| 44 |                                                          |                                          |
| 45 |                                                          |                                          |
| 46 |                                                          |                                          |

1  
2  
3  
4  
5  
6  
7  
8  
9  
10  
11  
12  
13  
14  
15  
16  
17  
18  
19  
20  
21  
22  
23  
24  
25  
26  
27  
28  
29  
30  
31  
32  
33  
34  
35  
36  
37  
38  
39  
40  
41  
42  
43  
44  
45  
46

|                                            |                                     |
|--------------------------------------------|-------------------------------------|
| Wakayama-Seikyo Hospital                   | Teruyuki Habu                       |
| Yaizu City Hospital                        | Seiya Takehara                      |
| Yamagata City Hospital Saiseikan           | Rei Kondo                           |
| Yamagata Prefectural Central Hospital      | Takashi Kumagai                     |
| Yamagata Prefectural Shinjo Hospital       | Keiten So                           |
| Yamagata University Hospital               | Yukihiko Sonoda                     |
| Yamaguchi Prefectural Grand Medical Center | Manabu Urakawa                      |
| Yamaguchi Red Cross Hospital               | Yasuhiro Hamada                     |
| Yamaguchi University Hospital              | Michiyasu Suzuki                    |
| Yamanashi Prefectural Central Hospital     | Shin Nakano, Hidehito Koizumi       |
| Yamanashi Redcross Hospital                | Hiroshi Ozawa                       |
| Yamanashikouseibyuin                       | Mikito Uchida                       |
| Yamato Municipal Hospital                  | Masaru Yamada                       |
| Yao Tokushukai General Hospital            | Takashi Turuno                      |
| Yatsuo General Hospital                    | Ryouichi Masuda                     |
| Yawata Medical Center                      | Makoto Kimura                       |
| Yayoigaoka Kage Hospital                   | Shin-Ichiro Ishihara                |
| Yodogawa Christian Hospital                | Masashi Morikawa                    |
| Yokohama City Minato Red Cross Hospital    | Yasunori Takemoto, Hiroaki Tanaka   |
| Yokohama City University Hospital          | Hidetoshi Murata, Nobutaka Kawahara |
| Yokohama City University Medical Center    | Katsumi Sakata                      |



1  
2  
3  
4 Yokohamasinmidorihospital

Endo Sumio

5  
6 Yonezawa City Hospital

Tooru Sasaki

7  
8 Yoshida Hospital

Yasuhisa Yoshida

9  
10 Yuaikaihospital

Yoshihumi Teramoto

11  
12  
13  
14  
15  
16  
17  
18  
19  
20  
21  
22  
23  
24  
25  
26  
27  
28  
29  
30  
31  
32  
33  
34  
35  
36  
37  
38  
39  
40  
41  
42  
43  
44  
45  
46

For peer review only

1  
2  
3  
4  
5  
6  
7  
8  
9  
10  
11  
12  
13  
14  
15  
16  
17  
18  
19  
20  
21  
22  
23  
24  
25  
26  
27  
28  
29  
30  
31  
32  
33  
34  
35  
36  
37  
38  
39  
40  
41  
42  
43  
44  
45  
46  
47  
48  
49  
50  
51  
52  
53  
54  
55  
56  
57  
58  
59  
60STROBE Statement—Checklist of items that should be included in reports of *cross-sectional studies*

|                              | Item No | Recommendation                                                                                                                                                                                    | Page No |
|------------------------------|---------|---------------------------------------------------------------------------------------------------------------------------------------------------------------------------------------------------|---------|
| <b>Title and abstract</b>    | 1       | (a) Indicate the study's design with a commonly used term in the title or the abstract                                                                                                            | 3       |
|                              |         | (b) Provide in the abstract an informative and balanced summary of what was done and what was found                                                                                               | 4       |
| <b>Introduction</b>          |         |                                                                                                                                                                                                   |         |
| Background/rationale         | 2       | Explain the scientific background and rationale for the investigation being reported                                                                                                              | 5       |
| Objectives                   | 3       | State specific objectives, including any prespecified hypotheses                                                                                                                                  | 6       |
| <b>Methods</b>               |         |                                                                                                                                                                                                   |         |
| Study design                 | 4       | Present key elements of study design early in the paper                                                                                                                                           | 6       |
| Setting                      | 5       | Describe the setting, locations, and relevant dates, including periods of recruitment, exposure, follow-up, and data collection                                                                   | 6       |
| Participants                 | 6       | (a) Give the eligibility criteria, and the sources and methods of selection of participants                                                                                                       | 6       |
| Variables                    | 7       | Clearly define all outcomes, exposures, predictors, potential confounders, and effect modifiers. Give diagnostic criteria, if applicable                                                          | 7       |
| Data sources/<br>measurement | 8*      | For each variable of interest, give sources of data and details of methods of assessment (measurement). Describe comparability of assessment methods if there is more than one group              | 6,7     |
| Bias                         | 9       | Describe any efforts to address potential sources of bias                                                                                                                                         | 11      |
| Study size                   | 10      | Explain how the study size was arrived at                                                                                                                                                         | 8       |
| Quantitative variables       | 11      | Explain how quantitative variables were handled in the analyses. If applicable, describe which groupings were chosen and why                                                                      | 7       |
| Statistical methods          | 12      | (a) Describe all statistical methods, including those used to control for confounding                                                                                                             | 7       |
|                              |         | (b) Describe any methods used to examine subgroups and interactions                                                                                                                               | 7       |
|                              |         | (c) Explain how missing data were addressed                                                                                                                                                       | 10      |
|                              |         | (d) If applicable, describe analytical methods taking account of sampling strategy                                                                                                                | -       |
|                              |         | (e) Describe any sensitivity analyses                                                                                                                                                             | -       |
| <b>Results</b>               |         |                                                                                                                                                                                                   |         |
| Participants                 | 13*     | (a) Report numbers of individuals at each stage of study—eg numbers potentially eligible, examined for eligibility, confirmed eligible, included in the study, completing follow-up, and analysed | 11      |
|                              |         | (b) Give reasons for non-participation at each stage                                                                                                                                              | 14      |
|                              |         | (c) Consider use of a flow diagram                                                                                                                                                                | -       |
| Descriptive data             | 14*     | (a) Give characteristics of study participants (eg demographic, clinical, social) and information on exposures and potential confounders                                                          | 11-14   |
|                              |         | (b) Indicate number of participants with missing data for each variable of interest                                                                                                               | 14      |
| Outcome data                 | 15*     | Report numbers of outcome events or summary measures                                                                                                                                              | 11-14   |
| Main results                 | 16      | (a) Give unadjusted estimates and, if applicable, confounder-adjusted estimates and their precision (eg, 95% confidence interval). Make clear                                                     | 11-13   |

|                          |    |                                                                                                                                                                            |       |
|--------------------------|----|----------------------------------------------------------------------------------------------------------------------------------------------------------------------------|-------|
|                          |    | which confounders were adjusted for and why they were included                                                                                                             |       |
|                          |    | (b) Report category boundaries when continuous variables were categorized                                                                                                  | 11-13 |
|                          |    | (c) If relevant, consider translating estimates of relative risk into absolute risk for a meaningful time period                                                           | 11-13 |
| Other analyses           | 17 | Report other analyses done—eg analyses of subgroups and interactions, and sensitivity analyses                                                                             | 13    |
| <b>Discussion</b>        |    |                                                                                                                                                                            |       |
| Key results              | 18 | Summarise key results with reference to study objectives                                                                                                                   | 14    |
| Limitations              | 19 | Discuss limitations of the study, taking into account sources of potential bias or imprecision. Discuss both direction and magnitude of any potential bias                 | 13,14 |
| Interpretation           | 20 | Give a cautious overall interpretation of results considering objectives, limitations, multiplicity of analyses, results from similar studies, and other relevant evidence | 15-17 |
| Generalisability         | 21 | Discuss the generalisability (external validity) of the study results                                                                                                      | 15-17 |
| <b>Other information</b> |    |                                                                                                                                                                            |       |
| Funding                  | 22 | Give the source of funding and the role of the funders for the present study and, if applicable, for the original study on which the present article is based              | 19    |

\*Give information separately for exposed and unexposed groups.

**Note:** An Explanation and Elaboration article discusses each checklist item and gives methodological background and published examples of transparent reporting. The STROBE checklist is best used in conjunction with this article (freely available on the Web sites of PLoS Medicine at <http://www.plosmedicine.org/>, Annals of Internal Medicine at <http://www.annals.org/>, and Epidemiology at <http://www.epidem.com/>). Information on the STROBE Initiative is available at [www.strobe-statement.org](http://www.strobe-statement.org).

# BMJ Open

## Temporal trends and geographical disparities in comprehensive stroke centre capabilities in Japan from 2010 to 2018

|                                 |                                                                                                                                                                                                                                                                                                                                                                                                                                                                                                                                                                                                                                                                                                                                                                                                                                                                                                                                 |
|---------------------------------|---------------------------------------------------------------------------------------------------------------------------------------------------------------------------------------------------------------------------------------------------------------------------------------------------------------------------------------------------------------------------------------------------------------------------------------------------------------------------------------------------------------------------------------------------------------------------------------------------------------------------------------------------------------------------------------------------------------------------------------------------------------------------------------------------------------------------------------------------------------------------------------------------------------------------------|
| Journal:                        | <i>BMJ Open</i>                                                                                                                                                                                                                                                                                                                                                                                                                                                                                                                                                                                                                                                                                                                                                                                                                                                                                                                 |
| Manuscript ID                   | bmjopen-2019-033055.R2                                                                                                                                                                                                                                                                                                                                                                                                                                                                                                                                                                                                                                                                                                                                                                                                                                                                                                          |
| Article Type:                   | Original research                                                                                                                                                                                                                                                                                                                                                                                                                                                                                                                                                                                                                                                                                                                                                                                                                                                                                                               |
| Date Submitted by the Author:   | 07-May-2020                                                                                                                                                                                                                                                                                                                                                                                                                                                                                                                                                                                                                                                                                                                                                                                                                                                                                                                     |
| Complete List of Authors:       | KUROGI, AI; Graduate School of Medical Sciences, Kyushu University, neurosurgery<br>Nishimura, Ataru ; Graduate School of Medical Sciences, Kyushu University, neurosurgery<br>Nishimura, Kunihiro; National Cerebral and Cardiovascular Center, Cerebrovascular Medicine<br>Kada, Akiko ; National Hospital Organization Nagoya Medical Center, Department of Clinical Trials and Research<br>Onozuka, Daisuke; Kyushu University,<br>Hagihara, Akihito; Kyusyu University Graduate School of Medicine, Department of Health Services Management and Policy<br>Ogasawara, Kuniaki; Iwate Medical University School of Medicine, Department of Neurosurgery<br>Shiokawa, Yoshiaki ; Kyorin University Hospital, Department of Neurosurgery<br>Kitazono, Takanari; Kyushu University,<br>Arimura, Koichi; Kyushu University, Neurosurgery<br>Iihara, Koji ; Graduate School of Medical Sciences, Kyushu University, neurosurgery |
| <b>Primary Subject Heading</b>: | Neurology                                                                                                                                                                                                                                                                                                                                                                                                                                                                                                                                                                                                                                                                                                                                                                                                                                                                                                                       |
| Secondary Subject Heading:      | Cardiovascular medicine                                                                                                                                                                                                                                                                                                                                                                                                                                                                                                                                                                                                                                                                                                                                                                                                                                                                                                         |
| Keywords:                       | Stroke < NEUROLOGY, comprehensive stroke center, trends, Stroke medicine < INTERNAL MEDICINE                                                                                                                                                                                                                                                                                                                                                                                                                                                                                                                                                                                                                                                                                                                                                                                                                                    |
|                                 |                                                                                                                                                                                                                                                                                                                                                                                                                                                                                                                                                                                                                                                                                                                                                                                                                                                                                                                                 |

SCHOLARONE™  
Manuscripts

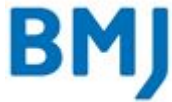

I, the Submitting Author has the right to grant and does grant on behalf of all authors of the Work (as defined in the below author licence), an exclusive licence and/or a non-exclusive licence for contributions from authors who are: i) UK Crown employees; ii) where BMJ has agreed a CC-BY licence shall apply, and/or iii) in accordance with the terms applicable for US Federal Government officers or employees acting as part of their official duties; on a worldwide, perpetual, irrevocable, royalty-free basis to BMJ Publishing Group Ltd ("BMJ") its licensees and where the relevant Journal is co-owned by BMJ to the co-owners of the Journal, to publish the Work in this journal and any other BMJ products and to exploit all rights, as set out in our [licence](#).

The Submitting Author accepts and understands that any supply made under these terms is made by BMJ to the Submitting Author unless you are acting as an employee on behalf of your employer or a postgraduate student of an affiliated institution which is paying any applicable article publishing charge ("APC") for Open Access articles. Where the Submitting Author wishes to make the Work available on an Open Access basis (and intends to pay the relevant APC), the terms of reuse of such Open Access shall be governed by a Creative Commons licence – details of these licences and which [Creative Commons](#) licence will apply to this Work are set out in our licence referred to above.

Other than as permitted in any relevant BMJ Author's Self Archiving Policies, I confirm this Work has not been accepted for publication elsewhere, is not being considered for publication elsewhere and does not duplicate material already published. I confirm all authors consent to publication of this Work and authorise the granting of this licence.

1  
2  
3  
4  
5  
6 **Temporal trends and geographical disparities in comprehensive stroke centre**  
7  
8 **capabilities in Japan from 2010 to 2018**  
9

10  
11  
12  
13 Ai Kurogi<sup>1</sup>, Ataru Nishimura<sup>1</sup>, Kunihiro Nishimura<sup>3</sup>, Akiko Kada<sup>4</sup>, Daisuke Onozuka<sup>3</sup>,  
14  
15 Akihito Hagihara<sup>3</sup>, Kuniaki Ogasawara<sup>5</sup>, Yoshiaki Shiokawa<sup>6</sup>, Takanari Kitazono<sup>2</sup>,  
16  
17 Koichi Arimura<sup>1</sup>, and Koji Iihara<sup>1</sup>, on behalf of the J-ASPECT Study Collaborators  
18  
19

20  
21  
22  
23  
24 <sup>1</sup>Department of Neurosurgery, and <sup>2</sup>Department of Medicine and Clinical Science,  
25  
26 Graduate School of Medical Sciences, Kyushu University, Fukuoka, Japan  
27

28  
29 <sup>3</sup>Department of Preventive Medicine and Epidemiology, National Cerebral and  
30  
31 Cardiovascular Center, Suita, Japan  
32

33  
34 <sup>4</sup> Department of Clinical Research Management, Clinical Research Center,  
35  
36 National Hospital Organization Nagoya Medical Centre, Nagoya, Japan  
37

38  
39 <sup>5</sup>Department of Neurosurgery, Iwate Medical University, Morioka, Japan  
40

41  
42 <sup>6</sup>Department of Neurosurgery, Kyorin University, Mitaka, Japan  
43  
44  
45  
46  
47  
48  
49

50  
51 **Corresponding author:** Koji Iihara, Department of Neurosurgery, Graduate  
52  
53 School of Medical Sciences, Kyushu University, 3-1-1, Higashi-ku, Maidashi,  
54  
55 Fukuoka, 812-8582, Japan. Email: kiihara@ns.med.kyushu-u.ac.jp  
56  
57  
58  
59  
60

1  
2  
3  
4  
5  
6  
7  
8  
9  
10  
11  
12  
13  
14  
15  
16  
17  
18  
19  
20  
21  
22  
23  
24  
25  
26  
27  
28  
29  
30  
31  
32  
33  
34  
35  
36  
37  
38  
39  
40  
41  
42  
43  
44  
45  
46  
47  
48  
49  
50  
51  
52  
53  
54  
55  
56  
57  
58  
59  
60

**Keywords:** stroke, comprehensive stroke centre, care quality

**Word count:** 2,209

For peer review only

## ABSTRACT

**Objectives:** Comprehensive stroke centre (CSC) capabilities are associated with reduced in-hospital mortality due to acute stroke. However, it remains unclear whether there are improving trends in the CSC capabilities, or how hospital-related factors determine quality improvement. This study examined whether CSC capabilities changed in Japan between 2010 and 2018, and whether any changes were influenced by hospital characteristics.

**Design:** A hospital-based cross-sectional study.

**Setting:** We sent out questionnaires to the training institutions of the Japan Neurosurgical Society and Japan Stroke Society in 2010, 2014 and 2018.

**Participants:** 749 in 2010, 532 in 2014 and 786 in 2018 hospitals that participate in the J-ASPECT study.

**Main outcome measures:** CSC capabilities were assessed using the validated scoring system (CSC score:1-25 points) in 2010, 2014, and 2018 survey. The effect of hospital characteristics was examined using multiple logistic regression analysis.



1  
2  
3  
4  
5  
6  
7 **Results:** Among the 323 hospitals that responded to all surveys, the  
8  
9  
10 implementation of 14 recommended items increased. The CSC score (median,  
11  
12  
13 interquartile range) was 16 (13-19), 18 (14-20), 19 (15-21), for 2010, 2014, and  
14  
15  
16 2018, respectively ( $p < 0.001$ ). There was a  $\geq 20\%$  increase in six items (e.g.  
17  
18  
19 endovascular physicians, stroke unit, and interventional coverage 24/7), and a  $\leq$   
20  
21  
22 20% decrease in community education. A lower baseline CSC score (odds ratio  
23  
24  
25 0.82, [95% confidence interval] 0.75-0.9), the number of beds  $\geq 500$  (3.9 [1.2–  
26  
27  
28 13.0]), and the number of stroke physicians (7-9) (2.6 [1.1-6.3]) was associated  
29  
30  
31  
32  
33 with improved CSC capabilities, independent of geographical location.

34  
35  
36 **Conclusions:** There was a significant improvement in CSC capabilities between  
37  
38  
39 2010 and 2018, which was mainly related to the availability of endovascular  
40  
41  
42 treatment and multidisciplinary care. Our findings may be useful to determine  
43  
44  
45 which hospitals should be targeted to improve CSC capabilities in a defined  
46  
47  
48 area.  
49  
50  
51

52  
53  
54  
55  
56 **Strengths and limitations of this study:**  
57  
58  
59  
60

- 1  
2  
3  
4  
5  
6  
7  
8  
9  
10  
11  
12  
13  
14  
15  
16  
17  
18  
19  
20  
21  
22  
23  
24  
25  
26  
27  
28  
29  
30  
31  
32  
33  
34  
35  
36  
37  
38  
39  
40  
41  
42  
43  
44  
45  
46  
47  
48  
49  
50  
51  
52  
53  
54  
55  
56  
57  
58  
59  
60
- A large-scale, representative hospitals of Japan provided data on temporal trends in the CSC capabilities for this cross-sectional study.
  - Hospitals actively working to improve stroke care are more likely to respond to the questionnaire, which may lead to information bias.
  - The CSC score was a significant composite measure to influence in-hospital mortality of acute stroke, but little information was established on the influence of specific items.

## INTRODUCTION

Stroke is the third leading cause of death and a leading cause of long-term disability in Japan. Primary and comprehensive stroke centres (CSCs) were developed to provide optimal implementation of intravenous recombinant tissue plasminogen activator (rt-PA) infusion and more intensive stroke care that includes endovascular and neurosurgical treatment.<sup>1,2</sup> Organised care in a stroke unit is associated with better quality of care and reduced death and dependency.<sup>3,4</sup> In addition to the influence of this process, previous studies have shown that patient outcomes associated with stroke and cardiovascular diseases are influenced by the hospital case volume,<sup>5,6</sup> number of physicians, and geographical locations of the facility<sup>7</sup>. Progressive rural-urban disparities in acute stroke care have been reported in the United States,<sup>8</sup> but it is not known whether such disparity exists in other countries.

In 2010, we launched the J-ASPECT study, a nationwide survey of acute stroke care capacity for proper designation of a comprehensive stroke centre in Japan.

<sup>9 10</sup> The J-ASPECT stroke database is a hospital-based, Japan-wide stroke

1  
2  
3  
4  
5  
6 registry. We demonstrated significant geographical differences in CSC  
7  
8  
9 capabilities in 2010,<sup>9</sup> and that CSC capabilities of a facility are associated with  
10  
11 reduced in-hospital mortality from acute stroke.<sup>10</sup> Thus continuous monitoring  
12  
13 of the CSC capabilities may be clinically meaningful to improve stroke  
14  
15 outcomes.<sup>10, 11</sup> Since 2010, we have conducted nationwide benchmark analyses  
16  
17 to allow participating hospitals to facilitate improvement of stroke care.  
18  
19  
20 However, it remains unclear whether there are improving trends in the CSC  
21  
22 capabilities, or how hospital-related factors determine quality improvement.  
23  
24  
25  
26  
27  
28  
29  
30  
31  
32  
33  
34  
35

## 36 AIMS

37  
38 We aimed to examine whether CSC capabilities in Japan changed from 2010 to  
39  
40 2018 and whether any recorded changes were influenced by hospital  
41  
42 characteristics.  
43  
44  
45  
46  
47  
48  
49  
50  
51  
52

## 53 METHODS

### 54 Institutional survey of CSC capabilities

55  
56  
57  
58  
59  
60

1  
2  
3  
4  
5  
6  
7 This cross-sectional survey used the DPC discharge database from participating  
8  
9  
10 institutions in the J-ASPECT study. Participation in the J-ASPECT study was  
11  
12  
13 voluntary. Of the 1369 training institutions certified by the Japan Neurosurgical  
14  
15  
16 Society, the Japanese Society of Neurology, and the Japan Stroke Society, 621  
17  
18  
19 agreed to participate in this study. The J-ASPECT study group analysed the  
20  
21  
22  
23 Diagnosis Procedure Combination (DPC) database to gain new clinical insights  
24  
25  
26 on ischaemic and haemorrhagic stroke, an approach we applied again for this  
27  
28  
29 cross-sectional survey. In this study, we sent out questionnaires to the training  
30  
31  
32  
33 institutions of all three societies in 2010, 2014, and 2018 to assess CSC  
34  
35  
36 capabilities. The CSC capabilities of each facility were assessed with a validated  
37  
38  
39 scoring system (CSC score), using 25 items recommended by the Brain Attack  
40  
41  
42  
43 Coalition <sup>2, 5-7</sup>.

44  
45  
46 All items were classified into five categories: personnel, diagnostic, specific  
47  
48  
49 expertise, infrastructure, and education. A score of 1 was assigned for meeting  
50  
51  
52  
53 each item, yielding a total CSC score of up to 25. Content, constructs, and  
54  
55  
56 predictive validity of this scoring system have been previously reported.<sup>12, 13</sup>  
57  
58  
59  
60

## Other hospital characteristics

Hospital characteristics including number of beds, annual stroke hospitalisations, stroke physicians, academic status, adoption of the Diagnosis Procedure Combination (DPC)-based payment system<sup>9</sup>, and geographic location were obtained from the 2010 survey. The geographic location was classified according to urban employment areas (UEAs) divided into Metropolitan Employment Areas (MEAs) and Micropolitan Employment Areas (McEAs).<sup>9</sup> The MEAs were further classified into central and outlying areas based on the commuting pattern of their inhabitants. Details of UEAs, such as total population or total land area, have been previously described.<sup>10</sup>

## Statistical analysis

To explore trends in CSC capabilities, we examined implementation of the 25 items and the CSC score in the 323 consecutively participating hospitals that responded to all surveys. To examine the influence of hospital-related factors

1  
2  
3  
4  
5  
6 on the change in CSC capabilities, we divided the hospitals into those with or  
7  
8  
9  
10 without a temporal improvement of CSC score ( $\geq 1$ -point increase between 2010  
11  
12  
13 and 2018). The increase of “One point” was set based on our previous report on  
14  
15  
16 the CSC score.<sup>11</sup> In that study, we showed that even a small preceding  
17  
18  
19 improvement of the CSC score was associated with reduced in-hospital  
20  
21  
22 mortality, reduced poor outcomes, and higher use of acute reperfusion therapy  
23  
24  
25 in AIS patients; our findings also suggested the difficulty in improving the CSC  
26  
27  
28 score in a relatively short time period.  
29  
30  
31

32  
33 We used a chi-squared test to detect differences between consecutively participating  
34  
35  
36 hospitals and other hospitals in the number of each hospital item. We did not perform  
37  
38  
39 multiple tests. Wilcoxon rank sum test was used to compare total CSC scores between  
40  
41  
42 consecutively participating hospitals and other hospitals.  
43  
44  
45

46 To explore the influence of hospital-related factors on temporal improvement of  
47  
48  
49 CSC capabilities, multiple logistic regression models were used. To assess  
50  
51  
52 selection bias, we compared hospital characteristics between consecutively  
53  
54  
55 participating hospitals with the others. We also examined the relationship between  
56  
57  
58  
59  
60

1  
2  
3  
4  
5  
6  
7 “number of physicians” and “hospital size” and the relationship between “number of  
8  
9  
10 physicians” and “CSC score” using chi-squared tests. All analyses were performed  
11  
12  
13 using the JMP Statistical Version 12 Software (SAS Institute Inc., Cary, NC,  
14  
15  
16 USA). P values of  $<0.05$  were considered statistically significant.  
17  
18  
19  
20  
21  
22

### 23 **Patient and public involvement**

24  
25  
26 Data for this study are based on information collected by the J-ASPECT study.  
27  
28  
29

30 Patients and the public were not involved in the development of this study.  
31  
32  
33  
34  
35

## 36 **RESULTS**

### 37 38 39 **Trends in the CSC capabilities from 2010 to 2018**

40  
41  
42 A total of 749, 532, and 786 hospitals responded to the survey in 2010, 2014, and  
43  
44  
45 2018, respectively. The implementation rates of each item are shown in Table 1.  
46  
47  
48

49 The median (interquartile range) of the CSC scores was 14 (11-18), 17 (13-19),  
50  
51  
52 and 17 (12-20.3), for each year, respectively (Table 1).  
53  
54  
55

56 Among consecutively participating hospitals, there was an increase in  
57  
58  
59  
60



1  
2  
3  
4  
5  
6  
7 implementation rates of the 14 items, and the CSC scores were (median,  
8  
9  
10 interquartile range): 16 (13-19), 18 (14-20), 19 (15-21), for 2010, 2014, and 2018,  
11  
12  
13 respectively ( $p < 0.001$ ) (Table 1). A marked increase ( $\geq 20\%$ ) was noted in six  
14  
15  
16 items related to endovascular treatment (endovascular physicians and  
17  
18  
19 interventional coverage 24/7) and multidisciplinary care (stroke unit, specialists  
20  
21  
22 of emergency medicine and physical medicine/rehabilitation, and stroke  
23  
24  
25  
26  
27 rehabilitation nurses).

28  
29  
30 In addition, a moderate increase ( $\leq 20\%$ ) was noted in eight items: 24/7  
31  
32  
33 availability of diffusion-weighted magnetic resonance imaging, digital and CT  
34  
35  
36 angiography, carotid ultrasound, coiling of an intracranial aneurysm, and  
37  
38  
39 implementation of stroke registry. In contrast, there was a marked decrease  
40  
41  
42  
43 ( $\leq 20\%$ ) in community education.  
44  
45  
46  
47  
48  
49

### 50 **Geographical differences in CSC capabilities between 2010 and 2018**

51  
52  
53 Among the seven items with significant geographical differences in 2010, all  
54  
55  
56 items in the personal component still showed a gap, despite overall  
57  
58  
59  
60

1  
2  
3  
4  
5  
6 improvement at all locations in 2018 (Table 2). In contrast, geographical  
7  
8  
9 differences in all infrastructure items diminished with overall improvement  
10  
11  
12 and a marked improvement in the McEA in 2018.  
13  
14  
15

16 Over the study period, geographical differences emerged in intra-arterial  
17  
18 reperfusion therapy and the number of specialists in physical  
19  
20 medicine/rehabilitation. The remaining item, coiling of intracranial aneurysms,  
21  
22 showed no changes.  
23  
24  
25  
26  
27  
28  
29  
30  
31  
32

### 33 **Influence of hospital characteristics on change in CSC capabilities**

34  
35 Among consecutively participating hospitals, 23 were excluded due to missing  
36  
37 data. Temporal improvement of CSC capabilities between 2010 and 2018 was  
38  
39 noted in 198 hospitals (66.0%). As for hospital characteristics, there were weakly  
40  
41 significant differences in bed number ( $p=0.016$ ) and CSC score in 2010 ( $p=0.032$ )  
42  
43 between the two groups on univariable analysis (Table 3).  
44  
45  
46  
47  
48  
49  
50  
51

52  
53 In the logistic regression analyses, the following variables had an association  
54  
55 with temporal improvement of CSC capabilities (Table 4): a lower baseline CSC  
56  
57  
58  
59  
60

1  
2  
3  
4  
5  
6 score (odds ratio 0.82 [95% confidence interval 0.75-0.9]), bed volume  $\geq 500$  (3.90,  
7  
8  
9 [1.17–13.0]), and moderate (7-9) number of stroke physicians (2.63, [1.10-6.27]).

10  
11  
12  
13 In contrast, geographical location, academic status, DPC-based payment system,  
14  
15  
16 and case volume of stroke did not show a significant association. We also  
17  
18  
19 performed the logistic regression analysis adjusting tertile, instead of quartile,  
20  
21  
22 of stroke physician volume in addition to the other adjusting factors. Except for  
23  
24  
25 Q3 of stroke physician volume, we found very similar results (Supplementary  
26  
27  
28 Table 1). Additionally, there was a significant relationship between hospital size and  
29  
30  
31 number of physicians ( $P < 0.001$ ), and between CSC score and number of  
32  
33  
34 physicians ( $P < 0.001$ ).  
35  
36  
37  
38  
39  
40  
41  
42

### 43 **Selection bias**

44  
45  
46 The response rates of the 2010, 2014, and 2018 surveys were 55.0%, 39.7%, and  
47  
48  
49 49.9%, respectively. We found that a selection bias did exist; in fact, the total  
50  
51  
52 CSC scores and most of the implementation rates of each item were  
53  
54  
55  
56 significantly higher for the consecutively participating hospitals than for the  
57  
58  
59  
60

1  
2  
3  
4  
5  
6 others in all three surveys (Table 1). Consecutively participating hospitals were  
7  
8  
9  
10 more likely to be MEA-central, academic, have a larger number of hospital beds,  
11  
12  
13 higher annual stroke admission rate, and more stroke physicians  
14  
15  
16 (Supplementary Table 2).  
17  
18  
19  
20  
21  
22  
23  
24  
25  
26

## 27 DISCUSSION

28  
29 We found an overall improvement in CSC capabilities between 2010 and 2018,  
30  
31  
32 and different trends in geographical disparities for different items. Hospitals  
33  
34  
35 with a higher number of hospital beds, intermediate number of stroke  
36  
37  
38 physicians, and a lower baseline CSC score had a higher likelihood of  
39  
40  
41  
42  
43 improving their CSC capabilities.  
44  
45  
46  
47  
48  
49

### 50 **Temporal Changes to CSC capabilities**

51  
52  
53 In addition to a significant increase in CSC capabilities, there was a marked  
54  
55  
56 increase in implementation of the items, mainly related to endovascular  
57  
58  
59  
60

1  
2  
3  
4  
5  
6 treatment and multidisciplinary care. Of note, we previously showed that  
7  
8  
9  
10 interventional 24/7 coverage and the presence of physical  
11  
12  
13 medicine/rehabilitation specialists were associated with reduced in-hospital  
14  
15  
16 mortality for patients with subarachnoid haemorrhage, whereas availability of  
17  
18  
19 neurologists and stroke units were associated with reduced in-hospital  
20  
21  
22 mortality and better functional outcomes, respectively, for those with ischaemic  
23  
24  
25 stroke.<sup>13</sup>

26  
27  
28  
29  
30 These findings are consistent with those of prior studies, which have shown  
31  
32  
33 that admission to a stroke unit with organised stroke care is associated with  
34  
35  
36 better quality of care and outcomes in those who experience an acute stroke.<sup>14 3</sup>  
37  
38  
39  
40 Although the use of mechanical thrombectomy for large vessel acute ischaemic  
41  
42  
43 stroke (AIS) has been rapidly increasing, only 3.3% of 15.1% potentially eligible  
44  
45  
46 AIS patients received it in 2016.<sup>15</sup> Improvement of CSC capabilities, especially  
47  
48  
49 related to endovascular treatment and multidisciplinary care, should contribute  
50  
51  
52  
53 to improved quality of care and outcomes in patients with acute stroke.

54  
55  
56 The decreased implementation of community education observed in this study  
57  
58  
59  
60

1  
2  
3  
4  
5  
6  
7 may be explained by the limited number of stroke physicians available for this  
8  
9  
10 purpose due to an increased burden of stroke care (e.g. emergent endovascular  
11  
12  
13 calls).<sup>16</sup> Stroke educational campaigns have the potential to improve  
14  
15  
16 knowledge and awareness, but public campaigns are usually expensive and  
17  
18  
19 short-lived and may not achieve any significant improvement.<sup>17</sup>  
20  
21  
22  
23  
24  
25

### 26 **Diminished and emerging geographical disparities**

27  
28  
29  
30 Determining rural/urban differences in CSC capabilities may support the  
31  
32  
33 development of targeted interventions to improve stroke care and outcomes in  
34  
35  
36 rural areas. We found differing trends in implementation of the items according  
37  
38  
39 to personnel and infrastructure components. Rural areas are associated with  
40  
41  
42 reduced access to optimal stroke care and a lower use of acute stroke  
43  
44  
45 intervention.<sup>18</sup> The diminished disparities in implementation of stroke units in  
46  
47  
48 this study might result in a higher use of rt-PA infusion in rural areas.<sup>19</sup>  
49  
50  
51

52  
53 The emerging disparities in implementation of intraarterial reperfusion  
54  
55  
56 therapy deserve some attention. Since the evidence regarding the efficacy of  
57  
58  
59  
60

1  
2  
3  
4  
5  
6 acute endovascular reperfusion therapy was established in 2015,<sup>20</sup> relocation of  
7  
8  
9  
10 relevant specialists might have occurred from rural to urban areas to meet the  
11  
12  
13 urgent need created by more widespread use. In addition, a high prevalence of  
14  
15  
16 neurointerventional physician burnout may require centralisation of acute  
17  
18  
19 endovascular reperfusion treatment.<sup>21</sup>  
20  
21  
22  
23  
24  
25

### 26 **Influence of hospital-related factors on improvement of CSC capabilities**

27  
28  
29 Our study showed the impact of specific hospital-related factors on  
30  
31  
32 improvement of CSC capabilities, which may be useful to determine which  
33  
34  
35 hospitals should be targeted to improve CSC capabilities, and in what regions.  
36  
37  
38

39  
40 In rural areas, where medical resources are limited, centralisation of acute  
41  
42  
43 stroke care in large hospitals may be needed. We also found a significant  
44  
45  
46 relationship between CSC score and number of physicians. This means that, in  
47  
48  
49 2010, institutions with more physicians tended to have higher baseline CSC scores. The  
50  
51  
52 reason that a physician volume of more than 10 did not affect the improvement of the  
53  
54  
55 CSC score may be explained by the ceiling effect of a high baseline CSC score in 2010.  
56  
57  
58  
59  
60

## Limitations

There are several limitations of this study. First, since the total CSC scores and most of the implementation rates of each item were significantly higher for the consecutively participating hospitals than for the others in all three surveys, our findings may have included biased information. Second, the CSC score was a significant composite measure to influence in-hospital mortality of acute stroke, but little information was established on the influence of specific items. Third, we did not determine the influence of unmeasured confounders. Fourth, the CSC score is a self-reported questionnaire rather than the result of any formal certification process. In Japan, the official certification process for PSCs (primary stroke centres) just began in 2019. The criteria for CSC certification is now under discussion by the Japan Stroke Society. The results of this study could have a significant impact on the recommended items and criteria for the designation of official CSCs in Japan. After the official certification process for CSCs is implemented, we plan to reassess the effect of CSC capabilities on AIS patients. Finally, the 2014 data did not factor into this analysis



1  
2  
3  
4  
5  
6 because of the small number of participants in that year. Further research is required to  
7  
8  
9  
10 examine the effect of 2014 data on the analysis.  
11  
12

### 13 **Conclusions**

14  
15  
16 The CSC capabilities in Japan improved between 2010 and 2018, especially  
17  
18  
19 related to endovascular treatment and multidisciplinary care. Our findings may  
20  
21  
22 be useful to determine which hospitals should be targeted to improve CSC capabilities  
23  
24  
25 in a defined area.  
26  
27  
28  
29  
30  
31  
32  
33  
34  
35

### 36 **Funding**

37  
38  
39 The J-ASPECT study is supported by the Practical Research Project for  
40  
41  
42 lifestyle-related diseases, including cardiovascular diseases and diabetes  
43  
44  
45 mellitus, managed by the Japan Agency for Medical Research and Development  
46  
47  
48 [JP19ek0210088 and JP19ek0210129]; Grants-in-Aid from the Japanese Ministry  
49  
50  
51 of Health, Labour, and Welfare; and KAKENHI grants [19AC0101] from the  
52  
53  
54 Japan Society for the Promotion of Science.  
55  
56  
57  
58  
59  
60

### **Competing interests statement**

None declared.

### **Ethics approval**

The study was approved by the Kyushu University Institutional Review Board, which waived the requirement for individual informed consent (No. 28-335)

### **Data availability statement**

We have documented the data, methods, and materials used to conduct the research in this report. The individual patient data are not publicly available because of the memorandum signed by the director of the participating hospitals and the principal investigator of the J-ASPECT Study group.

### **Authors and contributors**

A Kurogi and KI drafted the manuscript. AN, KN, A Kada, DO, AH and KI

1  
2  
3  
4  
5  
6 were involved in study concept, design and obtaining funding. A Kada, DO,  
7  
8  
9  
10 AH, KO, YS, TK, KA and KI were involved in analysis and of data. KO, YS, TK  
11  
12  
13 and KI were involved in acquisition of data. All authors reviewed the study  
14  
15  
16 report, made comments or suggestions on the manuscript drafts, and approved  
17  
18  
19  
20 the final version.  
21  
22  
23  
24  
25

## 26 **Acknowledgements**

27  
28  
29 We thank the Japan Neurosurgical Society and the Japan Stroke Society for their  
30  
31  
32 collaboration. We also thank all participating hospitals in the J-ASPECT study for  
33  
34  
35 contributing to this project. The institutions and names of the J-ASPECT Study  
36  
37  
38  
39 Collaborators are listed in Supplemental Appendix 1.  
40  
41  
42  
43  
44  
45

## 46 **Patient consent for publication**

47  
48  
49 Not required.  
50  
51  
52  
53  
54  
55  
56  
57  
58  
59  
60

## References

1. Alberts MJ, Hademenos G, Latchaw RE, et al. Recommendations for the establishment of primary stroke centers. Brain Attack Coalition. *JAMA* 2000;283:3102-9.
2. Alberts MJ, Latchaw RE, Selman WR, et al. Recommendations for Comprehensive Stroke Centers: A Consensus Statement From the Brain Attack Coalition. *Stroke* 2005;36:1597-616.
3. Collaboration SUT. Organised inpatient (stroke unit) care for stroke. Cochrane Database of Systematic Reviews 2013;Sep 11;(9):CD000197.
4. Bray BD, Ayis S, Campbell J, et al. Associations between the organisation of stroke services, process of care, and mortality in England: prospective cohort study. *BMJ* 2013;346:f2827.
5. Hall RE, Fang J, Hodwitz K, Saposnik G, Bayley MT. Does the Volume of Ischemic Stroke Admissions Relate to Clinical Outcomes in the Ontario Stroke System? *Circ Cardiovasc Qual Outcomes* 2015;8(6 Suppl 3):S141-7.
6. Ross JS, Normand SL, Wang Y, et al. Hospital volume and 30-day mortality for three common medical conditions. *N Engl J Med* 2010;362:1110-8.
7. Howard G, Kleindorfer DO, Cushman M, et al. Contributors to the Excess Stroke Mortality in Rural Areas in the United States. *Stroke* 2017;48:1773-8.

- 1  
2  
3  
4  
5  
6  
7  
8  
9  
10  
11  
12  
13  
14  
15  
16  
17  
18  
19  
20  
21  
22  
23  
24  
25  
26  
27  
28  
29  
30  
31  
32  
33  
34  
35  
36  
37  
38  
39  
40  
41  
42  
43  
44  
45  
46  
47  
48  
49  
50  
51  
52  
53  
54  
55  
56  
57  
58  
59  
60
8. Gonzales S, Mullen MT, Skolarus L, Thibault DP, Udoeyo U, Willis AW. Progressive rural-urban disparity in acute stroke care. *Neurology* 2017;88:441-8.
9. Iihara K, Nishimura K, Kada A, et al. The impact of comprehensive stroke care capacity on the hospital volume of stroke interventions: a nationwide study in Japan: J-ASPECT study. *J Stroke Cerebrovasc Dis* 2014;23:1001-18.
10. UEA Urban Employment Area. Available: [http://www.csis.u-tokyo.ac.jp/UEA/uea\\_data\\_e.htm](http://www.csis.u-tokyo.ac.jp/UEA/uea_data_e.htm) [Accessed 13 Jan. 2020].
11. Kada A, Ogasawara K, Kitazono T, et al. National trends in outcomes of ischemic stroke and prognostic influence of stroke center capability in Japan, 2010-2016. *Int J Stroke*. 2019.
12. Iihara K, Nishimura K, Kada A, et al. Effects of comprehensive stroke care capabilities on in-hospital mortality of patients with ischemic and hemorrhagic stroke: J-ASPECT study. *PLoS One* 2014;9:e96819.
13. Kada A, Nishimura K, Nakagawara J, et al. Development and validation of a score for evaluating comprehensive stroke care capabilities: J-ASPECT Study. *BMC Neurol* 2017;17:46.
14. Svendsen ML, Ehlers LH, Ingeman A, Johnsen SP. Higher stroke unit volume associated with improved quality of early stroke care and reduced length of stay. *Stroke* 2012;43:3041-5.
15. Smith EE, Saver JL, Cox M, et al. Increase in Endovascular Therapy in

1  
2  
3  
4  
5 Get With The Guidelines-Stroke After the Publication of Pivotal Trials.  
6  
7

8 *Circulation* 2017;136:2303-10.  
9

10 16. Williams MM, Wilson TA, Leslie-Mazwi T, et al. The burden of  
11 neurothrombectomy call: a multicenter prospective study. *J Neurointerv Surg*  
12  
13 2018.  
14  
15

16 17. Rasura M, Baldereschi M, Di Carlo A, et al. Effectiveness of public  
17 stroke educational interventions: a review. *Eur J Neurol* 2014;21:11-20.  
18  
19

20 18. Kapral MK, Austin PC, Jeyakumar G, et al. Rural-Urban Differences in  
21 Stroke Risk Factors, Incidence, and Mortality in People With and Without Prior  
22  
23  
24  
25  
26  
27  
28  
29  
30  
31  
32  
33  
34  
35  
36  
37  
38  
39  
40  
41  
42  
43  
44  
45  
46  
47  
48  
49  
50  
51  
52  
53  
54  
55  
56  
57  
58  
59  
60

19. Domino JS, Baek J, Meurer WJ, et al. Emerging temporal trends in  
tissue plasminogen activator use: Results from the BASIC project. *Neurology*  
2016;87:2184-91.

20. Goyal M, Menon BK, van Zwam WH, et al. Endovascular  
thrombectomy after large-vessel ischaemic stroke: a meta-analysis of individual  
patient data from five randomised trials. *The Lancet* 2016;387:1723-31.

21. Fargen KM, Arthur AS, Leslie-Mazwi T, et al. A survey of burnout and  
professional satisfaction among United States neurointerventionalists. *J*  
*Neurointerv Surg* 2019.

1  
2  
3  
4  
5  
6  
7  
8  
9  
10  
11  
12  
13  
14  
15  
16  
17  
18  
19  
20  
21  
22  
23  
24  
25  
26  
27  
28  
29  
30  
31  
32  
33  
34  
35  
36  
37  
38  
39  
40  
41  
42  
43  
44  
45  
46  
47  
48  
49  
50  
51  
52  
53  
54  
55  
56  
57  
58  
59  
60

For peer review only

**Table 1.** Number (percentage) of the responding hospitals fulfilling the recommended items of comprehensive stroke care capabilities.

| Components | Items                                | 2010                            |                                           |                     |         | 2014                            |                                           |                     |         | 2018                            |                                           |                     |         |
|------------|--------------------------------------|---------------------------------|-------------------------------------------|---------------------|---------|---------------------------------|-------------------------------------------|---------------------|---------|---------------------------------|-------------------------------------------|---------------------|---------|
|            |                                      | All participating Hsps. (n=749) | Consecutively participating Hsps. (n=323) | Other Hsps. (n=426) | p value | All participating Hsps. (n=532) | Consecutively participating Hsps. (n=323) | Other Hsps. (n=209) | p value | All participating Hsps. (n=786) | Consecutively participating Hsps. (n=323) | Other Hsps. (n=464) | p value |
| Personnel  | Neurologists                         | 358 (47.8)                      | 176 (54.5)                                | 182 (42.7)          | 0.001   | 283 (53.2)                      | 177 (54.8)                                | 106 (50.7)          | 0.357   | 452 (57.5)                      | 210 (65.0)                                | 242 (52.2)          | <0.001  |
|            | Neurosurgeons                        | 694 (92.7)                      | 314 (97.2)                                | 380 (89.2)          | <0.001  | 515 (96.8)                      | 317 (98.1)                                | 198 (94.7)          | 0.03    | 754 (95.9)                      | 317 (98.1)                                | 437 (94.2)          | 0.006   |
|            | Endovascular physicians              | 272 (36.3)                      | 146 (45.2)                                | 126 (29.6)          | <0.001  | 280 (52.6)                      | 196 (60.7)                                | 84 (40.2)           | <0.001  | 428 (54.4)                      | 211 (65.3)                                | 217 (46.8)          | <0.001  |
|            | Emergency medicine                   | 162 (21.6)                      | 96 (29.7)                                 | 66 (15.5)           | <0.001  | 207 (38.9)                      | 146 (45.2)                                | 61 (29.2)           | <0.001  | 427 (54.3)                      | 205 (63.5)                                | 222 (63.5)          | <0.001  |
|            | Physical medicine and rehabilitation | 113 (15.1)                      | 61 (18.9)                                 | 52 (12.2)           | 0.011   | 143 (26.9)                      | 95 (29.4)                                 | 48 (23.0)           | 0.102   | 313 (39.8)                      | 137 (42.4)                                | 176 (37.9)          | 0.206   |
|            | Rehabilitation therapy               | 742 (99.1)                      | 321 (99.4)                                | 421 (98.8)          | 0.435   | 529 (99.4)                      | 321 (99.4)                                | 208 (99.5)          | 0.832   | 779 (99.1)                      | 321 (99.4)                                | 458 (98.7)          | 0.354   |
|            | Stroke rehabilitation nurses         | 102 (13.6)                      | 48 (14.9)                                 | 54 (12.7)           | 0.388   | 157 (29.5)                      | 116 (35.9)                                | 41 (19.6)           | <0.001  | 285 (36.2)                      | 146 (45.2)                                | 139 (30.0)          | <0.001  |
| Diagnostic | CT                                   | 742 (99.1)                      | 322 (99.7)                                | 420 (98.6)          | 0.122   | 527 (99.1)                      | 322 (99.7)                                | 205 (98.1)          | 0.061   | 763 (97.1)                      | 322 (99.7)                                | 441 (85.0)          | <0.001  |
|            | MRI with diffusion                   | 647 (86.4)                      | 291 (90.1)                                | 356 (83.6)          | 0.01    | 504 (94.7)                      | 311 (96.3)                                | 193 (92.3)          | 0.047   | 732 (93.1)                      | 314 (97.2)                                | 418 (90.1)          | <0.001  |
|            | Digital cerebral angiography         | 602 (80.3)                      | 288 (89.2)                                | 314 (73.7)          | <0.001  | 476 (89.4)                      | 305 (94.4)                                | 171 (81.8)          | <0.001  | 638 (81.2)                      | 299 (92.6)                                | 399 (73.1)          | <0.001  |
|            | CT angiography                       | 627 (83.7)                      | 289 (89.5)                                | 338 (79.3)          | <0.001  | 492 (92.5)                      | 305 (94.4)                                | 187 (89.5)          | 0.034   | 701 (89.2)                      | 309 (95.7)                                | 392 (84.5)          | <0.001  |
|            | Carotid duplex ultrasound            | 257 (34.3)                      | 126 (39.0)                                | 131 (30.8)          | 0.018   | 219 (41.2)                      | 153 (47.4)                                | 66 (31.6)           | <0.001  | 343 (43.6)                      | 169 (52.3)                                | 174 (37.5)          | <0.001  |
| Specific   | TCD                                  | 121 (16.2)                      | 70 (21.7)                                 | 51 (12.0)           | <0.001  | 123 (23.1)                      | 87 (26.9)                                 | 36 (17.2)           | <0.010  | 162 (20.6)                      | 95 (29.4)                                 | 67 (14.4)           | <0.001  |
|            | Carotid endarterectomy               | 603 (80.5)                      | 292 (90.4)                                | 311 (73.0)          | <0.001  | 458 (86.1)                      | 288 (89.2)                                | 170 (81.3)          | 0.011   | 613 (78.0)                      | 284 (87.9)                                | 329 (70.9)          | <0.001  |



|    |                             |             |             |             |        |             |             |             |        |             |             |             |        |
|----|-----------------------------|-------------|-------------|-------------|--------|-------------|-------------|-------------|--------|-------------|-------------|-------------|--------|
| 1  |                             |             |             |             |        |             |             |             |        |             |             |             |        |
| 2  | Expertise                   |             |             |             |        |             |             |             |        |             |             |             |        |
| 3  |                             |             |             |             |        |             |             |             |        |             |             |             |        |
| 4  | Clipping of intracranial    |             |             |             |        |             |             |             |        |             |             |             |        |
| 5  | aneurysm                    | 685 (91.5)  | 314 (97.2)  | 371 (87.1)  | <0.001 | 504 (94.7)  | 315 (97.5)  | 189 (90.4)  | <0.001 | 706 (89.8)  | 314 (97.2)  | 392 (84.5)  | <0.001 |
| 6  |                             |             |             |             |        |             |             |             |        |             |             |             |        |
| 7  | Hematoma                    |             |             |             |        |             |             |             |        |             |             |             |        |
| 8  | removal/draining            | 689 (92.0)  | 315 (97.5)  | 374 (87.8)  | <0.001 | 505 (95.0)  | 315 (97.5)  | 190 (90.9)  | <0.001 | 718 (91.3)  | 314 (97.2)  | 404 (87.1)  | <0.001 |
| 9  |                             |             |             |             |        |             |             |             |        |             |             |             |        |
| 10 | Coiling of intracranial     |             |             |             |        |             |             |             |        |             |             |             |        |
| 11 | aneurysm                    | 360 (48.1)  | 192 (59.4)  | 168 (39.4)  | <0.001 | 332 (62.4)  | 223 (69.0)  | 109 (52.2)  | <0.001 | 448 (57.0)  | 223 (69.0)  | 225 (48.5)  | <0.001 |
| 12 |                             |             |             |             |        |             |             |             |        |             |             |             |        |
| 13 | Intra-arterial reperfusion  |             |             |             |        |             |             |             |        |             |             |             |        |
| 14 | therapy                     | 498 (66.5)  | 245 (75.9)  | 253 (59.4)  | <0.001 | 398 (74.8)  | 261 (80.8)  | 137 (65.6)  | <0.001 | 510 (64.9)  | 247 (76.5)  | 263 (56.7)  | <0.001 |
| 15 |                             |             |             |             |        |             |             |             |        |             |             |             |        |
| 16 |                             |             |             |             |        |             |             |             |        |             |             |             |        |
| 17 | Infrastructure              |             |             |             |        |             |             |             |        |             |             |             |        |
| 18 | Stroke unit                 | 132 (17.6)  | 74 (22.9)   | 58 (13.6)   | <0.001 | 202 (38.0)  | 136 (42.1)  | 66 (31.6)   | 0.015  | 342 (43.5)  | 171 (52.9)  | 171 (36.9)  | <0.001 |
| 19 |                             |             |             |             |        |             |             |             |        |             |             |             |        |
| 20 | Intensive care unit         | 445 (59.4)  | 214 (66.3)  | 231 (54.2)  | <0.001 | 362 (68.0)  | 224 (69.4)  | 138 (66.0)  | 0.422  | 467 (59.4)  | 220 (68.1)  | 247 (53.2)  | <0.001 |
| 21 |                             |             |             |             |        |             |             |             |        |             |             |             |        |
| 22 | Operating room staffed 24/7 | 451 (60.2)  | 230 (71.2)  | 221 (51.9)  | <0.001 | 339 (63.7)  | 239 (74.0)  | 100 (47.9)  | <0.001 | 487 (62.0)  | 243 (75.2)  | 244 (52.6)  | <0.001 |
| 23 |                             |             |             |             |        |             |             |             |        |             |             |             |        |
| 24 | Interventional services     |             |             |             |        |             |             |             |        |             |             |             |        |
| 25 | coverage 24/7               | 279 (37.3)  | 147 (45.5)  | 132 (31.0)  | <0.001 | 317 (59.6)  | 218 (67.5)  | 99 (47.4)   | <0.001 | 452 (57.5)  | 219 (67.8)  | 233 (50.2)  | <0.001 |
| 26 |                             |             |             |             |        |             |             |             |        |             |             |             |        |
| 27 | Stroke registry             | 235 (31.4)  | 133 (41.2)  | 102 (23.9)  | <0.001 | 260 (48.9)  | 172 (53.3)  | 88 (42.1)   | 0.012  | 349 (44.4)  | 164 (50.8)  | 185 (39.9)  | 0.003  |
| 28 | Education                   |             |             |             |        |             |             |             |        |             |             |             |        |
| 29 | Community education         | 369 (49.3)  | 188 (58.2)  | 181 (42.5)  | <0.001 | 144 (27.1)  | 91 (28.2)   | 53 (25.4)   | 0.476  | 204 (26.0)  | 98 (30.3)   | 106 (22.8)  | 0.018  |
| 30 |                             |             |             |             |        |             |             |             |        |             |             |             |        |
| 31 | Professional education      | 436 (58.2)  | 207 (64.1)  | 229 (53.8)  | 0.005  | 326 (61.3)  | 208 (64.4)  | 118 (56.5)  | 0.066  | 429 (54.6)  | 184 (57.0)  | 245 (52.8)  | 0.249  |
| 32 | Total CSC score             |             |             |             |        |             |             |             |        |             |             |             |        |
| 33 | median, (IQR)               | 14 (11, 18) | 16 (13, 19) | 13 (10, 17) | <0.001 | 17 (13, 19) | 18 (14, 20) | 15 (12, 18) | <0.001 | 17 (12, 20) | 19 (15, 21) | 15 (10, 19) | <0.001 |

34  
35Hsp, hospital; CT, computed tomography; MRI, magnetic resonance imaging; TCD, transcranial Doppler.

36

37

38

39

40

41

42

43

44

45

46

**Table 2.** Characteristics of comprehensive stroke care capabilities according to the geographical differences

|                    |                                      | a) 2010     |              |            |         | b) 2018     |              |           |         |
|--------------------|--------------------------------------|-------------|--------------|------------|---------|-------------|--------------|-----------|---------|
|                    |                                      | MEA central | MEA outlying | McEA       | P value | MEA central | MEA outlying | McEA      | P value |
|                    |                                      | (n=186)     | (n=79)       | (n=35)     |         | (n=186)     | (n=79)       | (n=35)    |         |
| Personnel          | Neurologists                         | 115 (61.8)  | 44 (55.7)    | 10 (28.6)  | 0.001   | 133(71.5)   | 55(69.6)     | 14 (40.0) | 0.001   |
|                    | Neurosurgeons                        | 181 (97.3)  | 77 (97.5)    | 34 (97.1)  | 0.995   | 183 (98.4)  | 78 (98.7)    | 34 (97.1) | 0.826   |
|                    | Endovascular physicians              | 101 (54.3)  | 31 (39.2)    | 8 (22.9)   | <0.001  | 136 (73.1)  | 49 (62.0)    | 14 (40.0) | <0.001  |
|                    | Emergency medicine                   | 57 (30.7)   | 25 (31.7)    | 7 (20.0)   | 0.406   | 122 (65.6)  | 54 (68.4)    | 16 (45.7) | 0.052   |
|                    | Physical medicine and rehabilitation | 36 (19.4)   | 16 (20.3)    | 5 (14.3)   | 0.740   | 83 (44.6)   | 42 (53.2)    | 3 (8.6)   | <0.001  |
|                    | Rehabilitation therapy               | 185 (99.5)  | 78 (98.7)    | 35 (100)   | 0.701   | 185 (99.5)  | 78 (98.7)    | 35 (100)  | 0.701   |
|                    | Stroke rehabilitation nurses         | 33 (17.8)   | 9 (11.4)     | 1 (2.9)    | 0.049   | 90 (48.4)   | 41 (51.9)    | 9 (25.7)  | 0.027   |
| Diagnostic         | CT                                   | 185 (99.5)  | 79 (100.0)   | 35 (100.0) | 0.735   | 185 (100)   | 79 (100)     | 35 (100)  | 0.735   |
|                    | MRI with diffusion                   | 167 (89.8)  | 69 (87.3)    | 33 (94.3)  | 0.530   | 179 (96.2)  | 78 (98.7)    | 35 (100)  | 0.299   |
|                    | Digital cerebral angiography         | 165 (88.7)  | 70 (88.6)    | 34 (97.1)  | 0.303   | 168 (90.3)  | 76 (96.2)    | 33 (94.3) | 0.232   |
|                    | CT angiography                       | 163 (87.6)  | 72 (91.1)    | 32 (91.4)  | 0.627   | 176 (94.6)  | 77 (97.5)    | 34 (97.1) | 0.525   |
|                    | Carotid duplex ultrasound            | 71 (38.1)   | 30 (38.0)    | 14 (40.0)  | 0.977   | 95 (51.1)   | 48 (60.8)    | 15 (42.9) | 0.164   |
|                    | TCD                                  | 43 (23.1)   | 18 (22.8)    | 3 (8.6)    | 0.146   | 54 (29.0)   | 29 (36.7)    | 5 (14.3)  | 0.052   |
| Specific Expertise | Carotid endarterectomy               | 173 (93.0)  | 68 (86.1)    | 32 (91.4)  | 0.196   | 166 (89.3)  | 71 (89.9)    | 28 (80)   | 0.260   |
|                    | Clipping of intracranial aneurysm    | 183 (98.4)  | 75 (94.9)    | 34 (97.1)  | 0.280   | 181 (97.3)  | 77 (97.5)    | 34 (97.1) | 0.995   |

|                |                                          |            |           |           |        |            |           |           |        |
|----------------|------------------------------------------|------------|-----------|-----------|--------|------------|-----------|-----------|--------|
|                | Hematoma removal/draining                | 183 (98.4) | 76 (96.2) | 34 (97.1) | 0.546  | 182 (97.9) | 77 (97.5) | 35 (94.3) | 0.485  |
|                | Coiling of intracranial aneurysm         | 119 (64.0) | 46 (58.2) | 13 (37.1) | 0.012  | 143 (76.9) | 49 (62.0) | 17 (48.6) | <0.001 |
|                | Intra-arterial reperfusion therapy       | 142 (76.3) | 58 (73.4) | 27 (77.1) | 0.859  | 153 (82.3) | 57 (72.2) | 22 (62.9) | 0.019  |
| Infrastructure | Stroke unit                              | 50 (26.9)  | 17 (21.5) | 2 (5.7)   | 0.023  | 106 (57.0) | 44 (55.7) | 13 (37.1) | 0.093  |
|                | Intensive care unit                      | 123 (66.1) | 54 (68.4) | 21 (60.0) | 0.685  | 134 (72.0) | 54 (68.4) | 18 (51.4) | 0.054  |
|                | Operating room staffed 24/7              | 143 (76.9) | 59 (74.7) | 15 (42.9) | <0.001 | 148 (79.6) | 56 (70.9) | 22 (62.9) | 0.062  |
|                | Interventional services coverage<br>24/7 | 103 (55.4) | 30 (38.0) | 6 (17.1)  | <0.001 | 133 (71.5) | 54 (68.4) | 18 (51.4) | 0.064  |
|                | Stroke registry                          | 81 (43.6)  | 31 (29.1) | 15 (42.9) | 0.808  | 93 (50.0)  | 47 (59.5) | 15 (42.9) | 0.199  |
| Education      | Community education                      | 110 (59.1) | 53 (67.1) | 17 (48.6) | 0.164  | 55 (29.6)  | 28 (35.4) | 8 (22.9)  | 0.377  |
|                | Professional education                   | 125 (67.2) | 53 (67.1) | 17 (48.6) | 0.095  | 105 (56.5) | 47 (59.5) | 17 (48.6) | 0.555  |

\*MEA metropolitan, McEA microplitan.

**Table 3.** Hospital characteristics those with/without temporal improvement of the CSC capabilities.

| Hospital-related factors in 2010 | all Consecutively participating Hsps. (n=300) | Improvement Hsps. (n=198) | No improvement Hsps. (n=102) | p value <sup>#</sup> |
|----------------------------------|-----------------------------------------------|---------------------------|------------------------------|----------------------|
| Hospital locations               |                                               |                           |                              | 0.478                |
| MEA central                      | 186 (62.0)                                    | 121 (61.1)                | 65 (63.7)                    |                      |
| MEA outlying                     | 79 (26.3)                                     | 56 (28.3)                 | 23 (22.6)                    |                      |
| McEA                             | 35 (11.7)                                     | 21 (10.6)                 | 14 (13.7)                    |                      |
| CSC score in 2010                |                                               |                           |                              |                      |
| median (IQR)                     | 16 (13, 19)                                   | 16 (13, 18)               | 17 (13, 20)                  | 0.032                |
| Academic hospital                | 58 (19.3)                                     | 42 (21.2)                 | 16 (15.7)                    | 0.251                |
| DPC* hospital                    | 225 (75.0)                                    | 145 (73.2)                | 80 (78.4)                    | 0.325                |
| Number of hospital beds          |                                               |                           |                              | 0.016                |
| 1-99                             | 17 (5.7)                                      | 9 (4.6)                   | 8 (7.8)                      |                      |
| 100-299                          | 68 (22.7)                                     | 37 (18.7)                 | 31 (30.4)                    |                      |
| 300-499                          | 96 (32.0)                                     | 62 (31.1)                 | 34 (33.3)                    |                      |
| ≥500                             | 119 (39.7)                                    | 90 (45.5)                 | 29 (28.4)                    |                      |

|                                                   |            |            |            |       |
|---------------------------------------------------|------------|------------|------------|-------|
| Annual stroke case volume                         |            |            |            | 0.915 |
| 0-99                                              | 34 (11.3)  | 21 (10.6)  | 13 (12.8)  |       |
| 100-199                                           | 73 (24.3)  | 47 (23.7)  | 26 (25.5)  |       |
| 200-299                                           | 67 (22.3)  | 45 (22.7)  | 22 (21.6)  |       |
| $\geq 300$                                        | 126 (42.0) | 85 (42.9)  | 41 (40.2)  |       |
| Number of stroke physician volume<br>median (IQR) | 6 (3, 9)   | 6 (3.8, 9) | 5 (3, 9.3) | 0.139 |
| Number of stroke physician volume<br>quartile     |            |            |            |       |
| Q1 (0-3)                                          | 82 (27.3)  | 49 (24.8)  | 33 (32.4)  |       |
| Q2 (4-6)                                          | 68 (22.7)  | 43 (21.7)  | 25 (24.5)  |       |
| Q3 (7-9)                                          | 80 (26.7)  | 61 (30.8)  | 19 (18.6)  |       |
| Q4 ( $\geq 10$ )                                  | 70 (23.3)  | 45 (22.7)  | 25 (24.5)  |       |
| Number of stroke physician volume<br>tertile      |            |            |            |       |
| T1 (0-4)                                          | 114 (38.0) | 72 (36.4)  | 42 (41.2)  |       |
| T2 (4-8)                                          | 96 (32.0)  | 63 (31.8)  | 33 (32.4)  |       |
| T3 ( $\geq 9$ )                                   | 90 (30.0)  | 63 (31.8)  | 27 (26.5)  |       |

\*DPC: Diagnostic Procedure Combination, Hsp: hospital, # p value: Improvement vs. No improvement hospitals, MEA:

1  
2  
3 metropolitan, McEA: micropolitan  
4  
5  
6  
7  
8  
9  
10  
11  
12  
13  
14  
15  
16  
17  
18  
19  
20  
21  
22  
23  
24  
25  
26  
27  
28  
29  
30  
31  
32  
33  
34  
35  
36  
37  
38  
39  
40  
41  
42  
43  
44  
45  
46

For peer review only

**Table 4.** Multivariable analysis of the impact of hospital characteristics on one-point increases of the CSC score

| Hospital-related factors in 2010 | Odds ratio | 95%CI     | P value |
|----------------------------------|------------|-----------|---------|
| Hospital locations               |            |           |         |
| MEA central                      | ref.       |           |         |
| MEA outlying                     | 1.42       | 0.76-2.65 | 0.269   |
| McEA                             | 0.82       | 0.36-1.86 | 0.632   |
| CSC score in 2010                |            |           |         |
|                                  | 0.82       | 0.75-0.90 | <0.001  |
| Academic hospital                |            |           |         |
|                                  | 1.37       | 0.54-3.48 | 0.506   |
| DPC hospital                     |            |           |         |
|                                  | 0.77       | 0.41-1.42 | 0.397   |
| Number of beds                   |            |           |         |
| 1-99                             | ref.       |           |         |
| 100-299                          | 1.16       | 0.37-3.66 | 0.794   |

|                                            |      |           |              |
|--------------------------------------------|------|-----------|--------------|
| 300-499                                    | 1.68 | 0.56-5.10 | 0.358        |
| ≥500                                       | 3.9  | 1.17-13.0 | 0.027        |
|                                            |      | 0         |              |
| Annual stroke case volume                  |      |           |              |
| 1-99                                       | ref. |           |              |
| 100-199                                    | 1.62 | 0.64-4.07 | 0.305        |
| 200-299                                    | 2.41 | 0.89-6.49 | 0.083        |
| ≥300                                       | 2.74 | 0.99-7.54 | 0.051        |
| Number of stroke physician volume quartile |      |           |              |
| Q1 (0-3)                                   | ref. |           |              |
| Q2 (4-6)                                   | 1.77 | 0.81-3.88 | 0.153        |
| Q3 (7-9)                                   | 2.63 | 1.10-6.27 | <b>0.030</b> |
| Q4 (≥10)                                   | 1.58 | 0.57-4.38 | 0.380        |

\*DPC: Diagnostic Procedure Combination, Hsp: hospital, # p value: Improvement vs. No improvement hospitals, MEA: metropolitan, McEA: micropolitan.



1  
2  
3  
4  
5  
6  
7  
8  
9  
10  
11  
12  
13  
14  
15  
16  
17  
18  
19  
20  
21  
22  
23  
24  
25  
26  
27  
28  
29  
30  
31  
32  
33  
34  
35  
36  
37  
38  
39  
40  
41  
42  
43  
44  
45  
46

**Supplemental material**

eTable 1. Multivariable analysis of the impact of the hospital characteristics on one-point increase of the CSC score

eTable 2. Univariable analysis of association between consecutively participating hospitals in all three surveys and the others

Supplemental Appendix 1. List of the J-ASPECT Study Collaborators.

For peer review only

eTable 1 Multivariable analysis of the impact of the hospital characteristics on one-point increase of the CSC score

| Hospital-related factors in 2010 | Odds | 95%CI      | P value          |
|----------------------------------|------|------------|------------------|
| Hospital locations               |      |            |                  |
| MEA central                      | ref. |            |                  |
| MEA outlying                     | 1.35 | 0.36-2.48  | 0.339            |
| McEA                             | 0.78 | 0.35-1.75  | 0.549            |
| CSC score in 2010                | 0.83 | 0.76-0.91  | <b>&lt;0.001</b> |
| Academic hospital                | 1.29 | 0.52-3.24  | 0.582            |
| DPC hospital                     | 0.72 | 0.39-1.34  | 0.302            |
| Number of beds                   |      |            |                  |
| 1-99                             | ref. |            |                  |
| 100-299                          | 1.1  | 0.36-3.41  | 0.868            |
| 300-499                          | 1.82 | 0.60-5.48  | 0.285            |
| ≥500                             | 3.81 | 1.16-12.54 | <b>0.028</b>     |
| Annual stroke case volume        |      |            |                  |

|                                      |      |           |              |
|--------------------------------------|------|-----------|--------------|
| 1-99                                 | ref. |           |              |
| 100-199                              | 1.68 | 0.67-4.18 | 0.267        |
| 200-299                              | 2.47 | 0.92-6.61 | 0.072        |
| ≥300                                 | 3.17 | 1.16-8.66 | <b>0.024</b> |
| Number of stroke physicians, tertile |      |           |              |
| T1 (0-4)                             | ref. |           |              |
| T2 (4-8)                             | 1.12 | 0.58-2.16 | 0.745        |
| T3 (≥9)                              | 1.35 | 0.57-3.21 | 0.492        |

eTable 2 Univariable analysis of association between consecutively participating hospitals in all three surveys and the others

|                      | All Hsps. in 2010<br>(n=749) | Consecutively<br>participating Hsps.<br>(n=323) | Other Hsps.<br>(n=426) | p value |
|----------------------|------------------------------|-------------------------------------------------|------------------------|---------|
| Hospital location    |                              |                                                 |                        | <0.001  |
| MEA central          | 381 (50.9)                   | 193 (59.8)                                      | 188 (44.1)             |         |
| MEA outlying         | 239 (31.9)                   | 83 (25.7)                                       | 156(36.6)              |         |
| McEA                 | 102 (13.6)                   | 38 (11.8)                                       | 64 (15.0)              |         |
| Unclassified         | 27 (3.6)                     | 9 (2.8)                                         | 18 (4.2)               |         |
| CSC score at 2010    |                              |                                                 |                        |         |
| median (IQR)         | 14 (11, 18)                  | 16 (13, 19)                                     | 13 (10, 17)            | <0.001  |
| Academic hospital    | 90 (12.1)                    | 61 (18.9)                                       | 29 (6.8)               | <0.001  |
| DPC hospital         | 553 (73.8)                   | 237 (73.4)                                      | 316 (74.2)             | 0.804   |
| Number of beds       |                              |                                                 |                        | <0.001  |
| <99                  | 50 (6.7)                     | 19 (5.9)                                        | 31 (7.3)               |         |
| 100-299              | 232 (31.0)                   | 75 (23.2)                                       | 157 (36.9)             |         |
| 300-499              | 260 (34.7)                   | 105 (32.5)                                      | 155 (36.4)             |         |
| ≥500                 | 207 (27.6)                   | 124 (38.4)                                      | 83 (19.5)              |         |
| Annual stroke volume |                              |                                                 |                        | <0.001  |
| <99                  | 129 (17.2)                   | 36 (11.2)                                       | 93 (21.8)              |         |

1  
2  
3  
4  
5  
6  
7  
8  
9  
10  
11  
12  
13  
14  
15  
16  
17  
18  
19  
20  
21  
22  
23  
24  
25  
26  
27  
28  
29  
30  
31  
32  
33  
34  
35  
36  
37  
38  
39  
40  
41  
42  
43  
44  
45  
46

|                                                 |            |            |            |        |
|-------------------------------------------------|------------|------------|------------|--------|
| 100-199                                         | 199 (26.5) | 76 (23.5)  | 123 (28.9) |        |
| 200-299                                         | 155 (20.7) | 70 (21.7)  | 85 (20.0)  |        |
| ≥300                                            | 228 (30.4) | 127 (39.3) | 101 (23.7) |        |
| N/A                                             | 38 (5.1)   | 14 (4.3)   | 24 (5.6)   |        |
| Number of stroke<br>physicians, median<br>(IQR) | 4 (3, 7)   | 5 (3, 9)   | 4 (2, 6)   | <0.001 |

\*DPC: Diagnostic Procedure Combination, Hsp: hospital, MEA: metropolitan, McEA: micropolitan

### Supplemental Appendix 1. List of the J-ASPECT Study Collaborators.

All Contributors were involved in collection of data.

| Hospitals                                | Responsible persons               |
|------------------------------------------|-----------------------------------|
| Ainomiyako Neurosurgery Hospital         | Isao Sasaki                       |
| Aizawa Hospital                          | Takao Hasimoto                    |
| Akita University Hospital                | Hiroaki Shimizu                   |
| Akocity Hospital                         | Minoru Asahi                      |
| Almeida Memorial Hospital                | Makoto Goda                       |
| Aomori City Hospital                     | Atsuhito Takemura                 |
| Aomori Prefectural Central Hospital      | Tatsuya Sasaki                    |
| Asahi General Hospital                   | Saburo Watanabe                   |
| Ashiya Municipal Hospital                | Seiko Kataoka                     |
| Atsuchi Neurosurgical Hospital           | Kouji Takasaki                    |
| Ayabe City Hospital                      | Kouji Shiga                       |
| Baba Memorial Hospital                   | Hidehuku Gi                       |
| Bellland General Hospital                | Ryunosuke Uranishi                |
| Beppu Medical Center                     | Yasuyuki Nagai                    |
| Chiba Cancer Center                      | Toshihiko Iuchi                   |
| Chiba Cerebral and Cardiovascular Center | Toshio Machida, Junichiro Shimada |
| Chiba Neurosurgical Clinic               | Kenji Wakui                       |
| Chiba Rosai Hospital                     | Takashi Saegusa                   |

1  
2  
3  
4  
5  
6  
7  
8  
9  
10  
11  
12  
13  
14  
15  
16  
17  
18  
19  
20  
21  
22  
23  
24  
25  
26  
27  
28  
29  
30  
31  
32  
33  
34  
35  
36  
37  
38  
39  
40  
41  
42  
43  
44  
45  
46

|                                                              |                                   |
|--------------------------------------------------------------|-----------------------------------|
| Chiba Tokushukai Hospital                                    | Isao Kitahara                     |
| Chidoribashi Hospital                                        | Yasushi Ejima                     |
| Chigasaki Municipal Hospital                                 | Takaakira Yokoyama                |
| Chikamori Hospital (Chikamori Health Care Group)             | Satoru Hayashi                    |
| Chutoen General Medical Center                               | Toshikazu Ichihashi               |
| Corporate Medical Association Shoikai Kasai Shoikai Hospital | Junichi Harashina                 |
| Daiichitowakaihospital                                       | Tsugumichi Ichioka                |
| Daiyukai General Hospital                                    | Takayuki Kato, Shinichi Shirakami |
| Date Red Cross Hospital                                      | Takeshi Matsuoka                  |
| Department of Neurosurgery Shiroyama Hospital                | Kenichi Murao                     |
| Dokkyo Medical University Koshigaya Hospital                 | Akio Hyodo, Tomoyuki Miyamoto     |
| Doutounoushinnkeigekabyouinn                                 | Teruo Kimura                      |
| Ebina General Hospital                                       | Tomonori Kobayashi                |
| Ehime Prefectural Central Hospital                           | Shinji Iwata                      |
| Faculty of Medicine, Saga University                         | Tatsuya Abe                       |
| Faculty of Medicine, University of Miyazaki                  | Hideo Takeshima                   |
| Fuchu Hospital                                               | Kazunori Yamanaka                 |
| Fuji City General Hospital                                   | Satoru Morooka                    |
| Fujii Neurosurgical Hospital                                 | Hideo Kunimine                    |
| Fujita General Hospital                                      | Satoshi Taira                     |
| Fujita Health University Hospital                            | Ichiro Nakahara, Yuichi Hirose    |

|    |                                       |                           |
|----|---------------------------------------|---------------------------|
| 1  |                                       |                           |
| 2  |                                       |                           |
| 3  |                                       |                           |
| 4  |                                       |                           |
| 5  | Fujiyoshida Municipal Hospital        | Syogo Imae                |
| 6  | Fukaya Red Cross Hospital             | Hirochiyo Wada            |
| 7  |                                       |                           |
| 8  | Fukuchiyama City Hospital             | Mamoru Murakami           |
| 9  |                                       |                           |
| 10 | Fukui Katsuyama General Hospital      | Masanori Kabuto           |
| 11 | Fukuoka Seisyukai Hospital            | Masaharu Tani, Isao Inoue |
| 12 |                                       |                           |
| 13 | Fukuoka Tokushukai Medical Center     | Hidenori Yoshida          |
| 14 |                                       |                           |
| 15 | Fukuoka University Chikushi Hospital  | Kiyoshi Kazekawa          |
| 16 | Fukuoka University Hospital           | Tooru Inoue               |
| 17 |                                       |                           |
| 18 | Fukuoka Wajiro Hospital               | Kouzou Fukuyama           |
| 19 |                                       |                           |
| 20 | Fukuokashinmizumaki Hospital          | Shigenari Kin             |
| 21 | Fukushima Medical University Hospital | Taku Sato                 |
| 22 |                                       |                           |
| 23 | Fukushima Red Cross Hospital          | Yoichi Watanabe           |
| 24 |                                       |                           |
| 25 | Gifu Municipal Hospital               | Tetsuya Tanigawara        |
| 26 | Gifu Prefectural Tajimi Hospital      | Junki Ito                 |
| 27 |                                       |                           |
| 28 | Gifu University Hospital              | Toru Iwama                |
| 29 |                                       |                           |
| 30 | Hachisuga Hospital                    | Yoshihisa Maeda           |
| 31 | Hakodate Central General Hospital     | Makoto Takeda             |
| 32 |                                       |                           |
| 33 | Hakodate Municipal Hospital           | Jun Niwa                  |
| 34 |                                       |                           |
| 35 | Hakodate Neurosurgical Hospital       | Mikio Nishiya             |
| 36 |                                       |                           |
| 37 | Hakujyuji Hospital                    | Shuji Hayasi              |
| 38 | Hamamatsu Medical Center              | Teiji Nakayama            |
| 39 |                                       |                           |
| 40 |                                       |                           |
| 41 |                                       |                           |
| 42 |                                       |                           |
| 43 |                                       |                           |
| 44 |                                       |                           |
| 45 |                                       |                           |
| 46 |                                       |                           |



1  
2  
3  
4  
5  
6  
7  
8  
9  
10  
11  
12  
13  
14  
15  
16  
17  
18  
19  
20  
21  
22  
23  
24  
25  
26  
27  
28  
29  
30  
31  
32  
33  
34  
35  
36  
37  
38  
39  
40  
41  
42  
43  
44  
45  
46

Hamanomachi Hospital

Koichirou Matsukado

Harasanshin Hospital

Tadahisa Shono

Hata Kenmin Hospital

Hiroyuki Nishimura

Higashiosaka City Medical Center

Takatoshi Fujimoto, Ryo Tamaki

Higashitotsuka Memorial Hospital

Satoshi Utsuki

Higashiyamato Hospital

Ikuo Kobayashi, Hirotooshi Ohtaka

Hirosaki Stroke and Rehabilitation Center

Takamitsu Uchizawa

Hirosaki University Hospital

Hiroki Ohkuma

Hiroshima City Hiroshima Citizens Hospital

Shigeki Nishino

Hiroshima Prefectural Hospital

Atsushi Tominaga

Hiroshima Red Cross Hospital & Atomic Bomb Survivors Hospital

Masayuki Sumida

Hiroshima University Hospital

Takahito Okazaki, Shirou Aoki

Hito Medical Center

Naoki Shinohara

Hokkaido Medical Center

Satoshi Ushikoshi

Hokkaido University Dept. Neurosurgery

Syunsuke Terasaka, Kiyohiro Houkin

Hokushikai Megumino Hospital

Mitsunobu Kaijima

Hokuto Hospital

Kimito Kondo, Kazumi Nitta

Hospital

Toshiki Ikeda, Hidetoshi Ooigawa

Hospital Nanbu Tokushukai

Tutomu Kadearu

Hukuoka City Hospital

Katsuyuki Hirakawa

Hyogo College of Medicine

Shinichi Yoshimura

|    |                                                               |                                   |
|----|---------------------------------------------------------------|-----------------------------------|
| 1  |                                                               |                                   |
| 2  |                                                               |                                   |
| 3  |                                                               |                                   |
| 4  |                                                               |                                   |
| 5  | Hyogo Prefectural Awaji Medical Center                        | Yoshio Sakagami                   |
| 6  | Hyogo Prefectural Kakogawa Medical Center                     | Hideo Aihara                      |
| 7  |                                                               |                                   |
| 8  | Hyogokenritu_Nishinomiya_Hospital                             | Takayuki Sakaki                   |
| 9  |                                                               |                                   |
| 10 | Ibaraki Prefectural Central Hospital                          | Hiroko Oyama, Yuuji Kujiraoka     |
| 11 | Ibaraki Seinan Medical Center Hospital                        | Keishi Fujita                     |
| 12 |                                                               |                                   |
| 13 | Iida Municipal Hospital                                       | Sumio Kobayashi                   |
| 14 |                                                               |                                   |
| 15 | Imari Arita Kyoritsu Hospital                                 | Nobuaki Momozaki                  |
| 16 | Ina Central Hospital                                          | Atsushi Sato                      |
| 17 |                                                               |                                   |
| 18 | Inagi Municipal Hospital                                      | Hideki Murakami, Tatsuo Iwasita   |
| 19 |                                                               |                                   |
| 20 | Institute of Brain and Blood Vessels Mihara Memorial Hospital | Akazi Kazunori, Takao Kanzawa     |
| 21 | Irixyouhoujin Okinawatokushuukai Uwajimatokushukai Hospital   | Hiromichi Sadashima               |
| 22 |                                                               |                                   |
| 23 | Iryohojin Seiwakai Wada Hospital                              | Shiro Miyata                      |
| 24 |                                                               |                                   |
| 25 | Iryouhoujinsyadanjinmeikai Akiyamanousinnkeigeka              | Takekazu Akiyama                  |
| 26 |                                                               |                                   |
| 27 | Iryouhouzinsyadan Meihoukai                                   |                                   |
| 28 | Yokohamashintoshinoushinkeigekabyouin                         | Akihiro Nemoto, Masafumi Morimoto |
| 29 |                                                               |                                   |
| 30 | Isahaya General Hospital                                      | Yoshihiro Nishiura                |
| 31 | Ise Red Cross Hospital                                        | Fumitaka Miya, Masunari Sibata    |
| 32 |                                                               |                                   |
| 33 | Ishikawa Prefectural Central Hospital                         | Yutaka Hayashi                    |
| 34 |                                                               |                                   |
| 35 | Ishinomaki Red Cross Hospital                                 | Syuichi Ishikawa                  |
| 36 |                                                               |                                   |
| 37 | Itabashi Chuo Medical Center                                  | Miura Naohisa                     |
| 38 | Itami Kousei Neurosurgical Hospital                           | Shinya Noda                       |
| 39 |                                                               |                                   |
| 40 |                                                               |                                   |
| 41 |                                                               |                                   |
| 42 |                                                               |                                   |
| 43 |                                                               |                                   |
| 44 |                                                               |                                   |
| 45 |                                                               |                                   |
| 46 |                                                               |                                   |

1  
2  
3  
4  
5  
6  
7  
8  
9  
10  
11  
12  
13  
14  
15  
16  
17  
18  
19  
20  
21  
22  
23  
24  
25  
26  
27  
28  
29  
30  
31  
32  
33  
34  
35  
36  
37  
38  
39  
40  
41  
42  
43  
44  
45  
46

Iwaki Kyoritsu General Hospital

Yasuhiro Suzuki

Iwata Municipal General Hospital

Shinji Amano

Iwate Medical University

Kuniaki Ogasawara

Iwate Prefectural Central Hospital

Takayuki Sugawara

Iwate Prefectural Iwai Hospital

Keiichi Saitou

Iwate Prefectural Kuji Hospital

Kazuyuki Miura

Iwate Prefectural Ninohe Hospital

Akinori Yabuta

Izumi Hospital

Makoto Hasebe

Izumino Hospital

Masato Seike

Japan Community Health Care Organization Chukyo Hospital

Akira Ikeda

Japan Community Health Care Organization Kyushu Hospital

Satoshi Inoha

Japan Community Health Care Organization Tokyo Takanawa

Hospital

Hirofumi Hiyama

Japan Organization of Occupational Health and Safety Kumamoto

Rousai Hospital

Hiromasa Tsuiki, Shigeo Yamashiro

Japanese Red Cross Akita Hospital

Keiichi Nishimaki

Japanese Red Cross Asahikawa Hospital

Katsumi Takizawa, Kenichi Makino

Japanese Red Cross Fukuoka Hospital

Hitoshi Tsugu, Jiro Kitayama

Japanese Red Cross Kitami Hospital

Nozomi Suzuki

Japanese Red Cross Kumamoto Hospital

Shu Hasegawa, Tadashi Terasaki

Japanese Red Cross Maebashi Hospital

Ken Asakura

|    |                                               |                            |
|----|-----------------------------------------------|----------------------------|
| 1  |                                               |                            |
| 2  |                                               |                            |
| 3  |                                               |                            |
| 4  |                                               |                            |
| 5  | Japanese Red Cross Medical Center             | Ichiro Suzuki              |
| 6  | Japanese Red Cross Society Hachinohe Hospital | Hiromu Konno               |
| 7  |                                               |                            |
| 8  | Japanese Red Cross Takayama Hospital          | Katsunobu Takenaka         |
| 9  |                                               |                            |
| 10 | Japanese Redcross Fukui Hospital              | Hiroki Toda, Taketo Hatano |
| 11 | Jcho Hitoyoshi Medical Center                 | Keizou Yamamoto            |
| 12 |                                               |                            |
| 13 | Jcho Kobe Central Hospital                    | Keigo Matsumoto            |
| 14 |                                               |                            |
| 15 | Jcho Kumamoto General Hospital                | Kazunari Koga              |
| 16 | Jcho Nankai Medical Center                    | Takamitsu Hikawa           |
| 17 |                                               |                            |
| 18 | Juntendo Universty Hospital                   | Hajime Arai                |
| 19 |                                               |                            |
| 20 | Kaetsu Hospital                               | Kazuaki Awamori            |
| 21 | Kaga Medical Center                           | Naoki Shirasaki            |
| 22 |                                               |                            |
| 23 | Kagawa Rosai Hospital                         | Kimihiko Yoshino           |
| 24 |                                               |                            |
| 25 | Kagawa University Hospital                    | Takashi Tamiya             |
| 26 | Kagoshima City Hospital                       | Kazuho Hirahara            |
| 27 |                                               |                            |
| 28 | Kagoshima Prefectural Kanoya Medical Center   | Shunichi Tanaka            |
| 29 |                                               |                            |
| 30 | Kagoshima Tokushukai Hospital                 | Teruaki Kawano             |
| 31 | Kagoshima University Hospital                 | Sei Sugata, Kazunori Arita |
| 32 |                                               |                            |
| 33 | Kan-Etsu Hospital                             | Masahiko Tanaka            |
| 34 |                                               |                            |
| 35 | Kanazawa Medical Univercity                   | Shunsuke Shiraga           |
| 36 | Kanazawa Neurosurgical Hospital               | Syuji Sato                 |
| 37 |                                               |                            |
| 38 | Kanazawa University Hospital                  | Mitsutoshi Nakada          |
| 39 |                                               |                            |
| 40 |                                               |                            |
| 41 |                                               |                            |
| 42 |                                               |                            |
| 43 |                                               |                            |
| 44 |                                               |                            |
| 45 |                                               |                            |
| 46 |                                               |                            |

1  
2  
3  
4  
5  
6  
7  
8  
9  
10  
11  
12  
13  
14  
15  
16  
17  
18  
19  
20  
21  
22  
23  
24  
25  
26  
27  
28  
29  
30  
31  
32  
33  
34  
35  
36  
37  
38  
39  
40  
41  
42  
43  
44  
45  
46

|                                                        |                             |
|--------------------------------------------------------|-----------------------------|
| Kaneda Hospital                                        | Kimihisa Kinoshita          |
| Kanmon Medical Center                                  | Katsuhiro Yamashita         |
| Kano Hospital                                          | Nakazawa Kazutomo           |
| Kansai Electric Power Hospital                         | Yasuhiro Fujimoto           |
| Kansai Medical University Hospital                     | Kunikazu Yoshimura          |
| Kanto Rosai Hospital                                   | Takayuki Tachizawa          |
| Kasaoka Daiichi Hospital                               | Akira Watanabe              |
| Kashiwaba Neurosurgical Hospital                       | Tetsuyuki Yoshimoto         |
| Kasugai Municipal Hospital                             | Naoto Kuwayama              |
| Kawasaki Medical School Hospital                       | Masaaki Uno                 |
| Kazuno Kosei Hospital                                  | Masayuki Sasou              |
| Keiju Medical Center                                   | Sotaro Higashi              |
| Keishunkai Medical Corporation Kobari General Hospital | Naoaki Sato                 |
| Kenwakai Hospital                                      | Masakazu Kitahara           |
| Kenwakai Otemati Hospital                              | Hiroshi Yoneda              |
| Kieikai Hospital                                       | Satoshi Suzuki              |
| Kindai University Hospital                             | Toshiho Ohtsuki, Amami Kato |
| Kindai University Sakai Hospital                       | Yusaku Nakamura             |
| Kiryu Kosei General Hospital                           | Satoshi Magarisawa          |
| Kishiwada City Hospital                                | Kenji Hashimoto             |
| Kishiwada Tokushukai Hospital                          | Hiroyuki Matsumoto          |

|    |                                           |                                      |
|----|-------------------------------------------|--------------------------------------|
| 1  |                                           |                                      |
| 2  |                                           |                                      |
| 3  |                                           |                                      |
| 4  |                                           |                                      |
| 5  | Kita-Harima Medical Center                | Hirotooshi Hamaguchi, Shigeru Miyake |
| 6  | Kitakami Saiseikai Hospital               | Tomohiko Satou                       |
| 7  |                                           |                                      |
| 8  | Kitakyusyu General Hospital               | Masaru Idei                          |
| 9  |                                           |                                      |
| 10 | Kitakyusyu Municipal Medical Center       | Masahiro Mizoguchi                   |
| 11 | Kitamurayama Hospital                     | Eiichiro Kamatsuka                   |
| 12 |                                           |                                      |
| 13 | Kitasato University School of Medicine    | Toshihiro Kumabe                     |
| 14 |                                           |                                      |
| 15 | Kobe City Medical Center General Hospital | Nobuyuki Sakai                       |
| 16 | Kobe Ekisaikai Hospital                   | Takashi Tominaga                     |
| 17 |                                           |                                      |
| 18 | Kobe Red Cross Hospital                   | Haruo Yamashita                      |
| 19 |                                           |                                      |
| 20 | Kobe University Hospital                  | Eiji Kohmura, Tatsushi Toda          |
| 21 | Kochi Health Sciences Center              | Tsuyoshi Oota, Masanori Morimoto     |
| 22 |                                           |                                      |
| 23 | Kochi Medical School Hospital             | Tetsuya Ueba                         |
| 24 |                                           |                                      |
| 25 | Kohka Public Hospital                     | Kazuyoshi Watanabe                   |
| 26 | Kohnan Hospital                           | Hidenori Endo                        |
| 27 |                                           |                                      |
| 28 | Kohsei General Hospital                   | Kenjirou Hujiwara, Minoru Nakagawa   |
| 29 |                                           |                                      |
| 30 | Kokura Memorial Hospital                  | Taketo Hatano, Akira Ishii           |
| 31 | Komaki City Hospital                      | Toshinori Hasegawa                   |
| 32 |                                           |                                      |
| 33 | Komatsu Municipal Hospital                | Hisashi Nitta                        |
| 34 |                                           |                                      |
| 35 | Komoro Kosei General Hospital             | Takayuki Kuroyanagi                  |
| 36 | Koshigaya Municipal Hospital              | Akira Tunoda                         |
| 37 |                                           |                                      |
| 38 | Koto Memorial Hospital                    | Hisao Hirai                          |
| 39 |                                           |                                      |
| 40 |                                           |                                      |
| 41 |                                           |                                      |
| 42 |                                           |                                      |
| 43 |                                           |                                      |
| 44 |                                           |                                      |
| 45 |                                           |                                      |
| 46 |                                           |                                      |

1  
2  
3  
4  
5  
6  
7  
8  
9  
10  
11  
12  
13  
14  
15  
16  
17  
18  
19  
20  
21  
22  
23  
24  
25  
26  
27  
28  
29  
30  
31  
32  
33  
34  
35  
36  
37  
38  
39  
40  
41  
42  
43  
44  
45  
46

Koyama Memorial Hospital  
Kugayama Hospital  
Kumamoto City Hospital  
Kurashiki Central Hospital  
Kurashiki Heisei Hospital  
Kurosawa Hospital  
Kurosishi General Hospital  
Kurosu Hospital  
Kurume University Hospital  
  
Kyorin University Hospital  
Kyoritsu Hospital  
Kyoto Okamoto Memorial Hospital  
Kyoto Second Red Cross Hospital  
Kyoto Univerisity Hospital  
Kyoto Yamashiro General Medical Center  
Kyotokatsura Hospital  
Kyotomin-Iren Chuohospital  
Kyushu Central Hospital of The Mutual Aid Association of Public  
School Teachers  
Kyushu Rosai Hospital

Takuya Kawai  
Mitsuyuki Fujitsuka  
Akira Takada, Seiji Tajiri  
Masaki Chin  
Hidemiti Sasayama  
Sigehiro Ohmori  
Seiko Hasegawa  
Kazuhiro Kikuchi, Mikio Teduka  
Motohiro Morioka  
Yoshiko Unno, Hiroki Yoshida , Teruyuki  
Hirano  
Masayuki Yokota  
Minoru Kidooka  
Hiroshi Tenjin  
Susumu Miyamoto  
Yoshihiro Iwamoto  
Yasumasa Yamamoto  
Yuko Shikata  
  
Hitonori Takaba  
Sei Haga

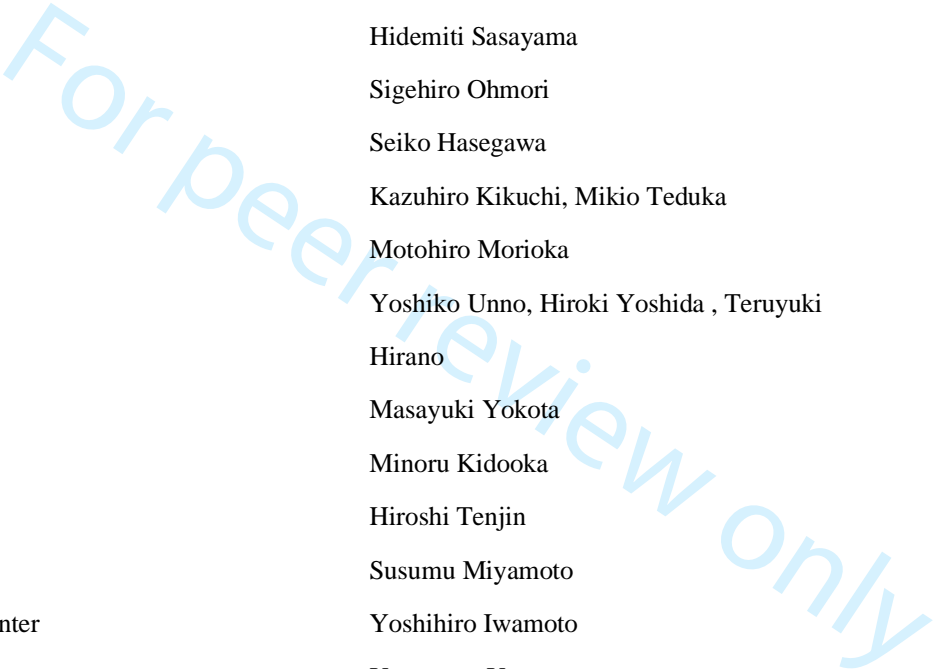

|    |                                                                                |                    |
|----|--------------------------------------------------------------------------------|--------------------|
| 1  |                                                                                |                    |
| 2  |                                                                                |                    |
| 3  |                                                                                |                    |
| 4  |                                                                                |                    |
| 5  | Kyushu University Hospital                                                     | Koji Iihara        |
| 6  | Local Incorporated Administrative Agency Tokushima Prefecture                  |                    |
| 7  |                                                                                |                    |
| 8  | Naruto Hospital                                                                | Masahito Agawa     |
| 9  |                                                                                |                    |
| 10 | Makita General Hospital                                                        | Yoshinori Arai     |
| 11 |                                                                                |                    |
| 12 | Maruko Central Hospital                                                        | Toshiyuki Tsukada  |
| 13 |                                                                                |                    |
| 14 | Matsushita Memorial Hospital                                                   | Nozomu Murai       |
| 15 |                                                                                |                    |
| 16 | Matsuyama Shimin Hospital                                                      | Masakazu Suga      |
| 17 |                                                                                |                    |
| 18 | Mazda Hospital                                                                 | Kawamoto Yukihiro  |
| 19 |                                                                                |                    |
| 20 | Medical Corporation Ijinkai Nakamura Memorial Hospital                         | Kenji Kamiyama     |
| 21 |                                                                                |                    |
| 22 | Medical Corporation Meiseikai Abashiri Neurosurgicalrehabilitation<br>Hospital | Naoto Izumi        |
| 23 |                                                                                |                    |
| 24 | Meitetsu Hospital                                                              | Youtarou Takeuchi  |
| 25 |                                                                                |                    |
| 26 | Midorigaoka Hospital                                                           | Motohiro Arai      |
| 27 |                                                                                |                    |
| 28 | Mie University Hospital                                                        | Hidenori Suzuki    |
| 29 |                                                                                |                    |
| 30 | Mimihara General Hospital                                                      | Shinji Okumura     |
| 31 |                                                                                |                    |
| 32 | Minamata City General Hospital and Medical Center                              | Makoto Yoshikawa   |
| 33 |                                                                                |                    |
| 34 | Minami Wakayama Medical Center                                                 | Yoshinari Nakamura |
| 35 |                                                                                |                    |
| 36 | Minato Medical Coop-Kyoritsu General Hospital                                  | Hisashi Tanaka     |
| 37 |                                                                                |                    |
| 38 | Mito Kyodo General Hospital                                                    | Yasusi Sibata      |
| 39 |                                                                                |                    |
| 40 | Mitoyogeneralhospital                                                          | Tetsuya Masaoka    |
| 41 |                                                                                |                    |
| 42 | Mitsugi General Hospital                                                       | Takashi Matsuoka   |
| 43 |                                                                                |                    |
| 44 |                                                                                |                    |
| 45 |                                                                                |                    |
| 46 |                                                                                |                    |



1  
2  
3  
4  
5  
6  
7  
8  
9  
10  
11  
12  
13  
14  
15  
16  
17  
18  
19  
20  
21  
22  
23  
24  
25  
26  
27  
28  
29  
30  
31  
32  
33  
34  
35  
36  
37  
38  
39  
40  
41  
42  
43  
44  
45  
46

Miyakonojo Medical Association Hospital

Hajime Ohta

Miyoshi Central Hospital

Osamu Hamasaki

Moriguchi-Ikuno Memorial Hospital

Misao Nishikawa

Morioka Red Cross Hospital

Naohiko Kubo

Munakata Suikokai General Hospital

Yosimasa Kinoshita

Muroran City General Hospital

Hiroshi Ooyama

Nagahama City Hospital

Taro Komuro

Nagano Municipal Hospital

Yoshikazu Kusano

Nagaoka Chuo General Hospital

Shigekazu Takeuchi

Nagasaki Kawatana Medical Center

Ei-Ichirou Urasaki

Nagasaki University Hospital

Takayuki Matsuo

Nagasaki Shimabara Hospital

Yoshiharu Tokunaga

Nagoya City University

Mitsuhiro Mase

Nagoya Daini Red Cross Hospital

Yukio Seki, Keizo Yasui

Nagoya University Hospital

Yoshio Araki

Naha City Hospital

Naoki Tomiyama

Nakamura Memorial South Hospital

Taiichiro Watanabe, Koji Oka

Nakatsu Municipal Hospital

Hiromichi Koga

Nara Medical University

Hiroyuki Nakase

Narita Red Cross Hospital

Michio Nakamura

National Cerebral and Cardiovascular Center

Jun Takahashi

|    |                                                           |                               |
|----|-----------------------------------------------------------|-------------------------------|
| 1  |                                                           |                               |
| 2  |                                                           |                               |
| 3  |                                                           |                               |
| 4  |                                                           |                               |
| 5  | National Hospital Organization Chiba Medical Center       | Hirokazu Tanno                |
| 6  | National Hospital Organization Hamada Medical Center      | Takato Kagawa                 |
| 7  |                                                           |                               |
| 8  | National Hospital Organization Himeji Medical Center      | Osamu Narumi                  |
| 9  |                                                           |                               |
| 10 | National Hospital Organization Kyushu Medical Center      | Akira Nakamizo, Shinji Nagata |
| 11 | National Hospital Organization Nagoya Medical Center      | Noriyuki Suzaki               |
| 12 |                                                           |                               |
| 13 | National Hospital Organization Okayama Medical Center     | Yoichiro Namba                |
| 14 |                                                           |                               |
| 15 | National Hospital Organization Osakaminami Medical Center | Tomonori Yamada               |
| 16 | National Hospital Organization Tochigi Medical Center     | Masayuki Ishihara             |
| 17 |                                                           |                               |
| 18 | National Hospital Organization Toyohashi Medical Center   | Hideki Sakai                  |
| 19 |                                                           |                               |
| 20 | National Hospital Organization Ureshino Medical Center    | Masayuki Miyazono             |
| 21 | National Hospital Organization, Iwakuni Clinical Center   | Kotaro Ogihara                |
| 22 |                                                           |                               |
| 23 | Nayoro City Hospital                                      | Naoki Tokumitsu               |
| 24 |                                                           |                               |
| 25 | Nho Sendai Medical Center                                 | Masayuki Ezura                |
| 26 |                                                           |                               |
| 27 | Nho Shinshu Ueda Medical Center                           | Keiichi Sakai                 |
| 28 |                                                           |                               |
| 29 | Nihon University Itabashi Hospital                        | Atsuo Yoshino                 |
| 30 | Niigata City General Hospital                             | Kenichi Morita, Akihiko Saito |
| 31 |                                                           |                               |
| 32 | Niigata Prefectural Central Hospital                      | Igarashi Michitoku            |
| 33 |                                                           |                               |
| 34 | Niigata Tokamachi Hospital                                | Mitsuo Kouno                  |
| 35 | Niigata University Medical and Dental Hospital            | Yukihiko Fujii, Osamu Onodera |
| 36 |                                                           |                               |
| 37 | Niigatanougekabyouin                                      | Kiyoshi Onda                  |
| 38 | Nishikobe Medical Center                                  | Naoya Takeda                  |
| 39 |                                                           |                               |
| 40 |                                                           |                               |
| 41 |                                                           |                               |
| 42 |                                                           |                               |
| 43 |                                                           |                               |
| 44 |                                                           |                               |
| 45 |                                                           |                               |
| 46 |                                                           |                               |

1  
2  
3  
4  
5  
6  
7  
8  
9  
10  
11  
12  
13  
14  
15  
16  
17  
18  
19  
20  
21  
22  
23  
24  
25  
26  
27  
28  
29  
30  
31  
32  
33  
34  
35  
36  
37  
38  
39  
40  
41  
42  
43  
44  
45  
46

|                                             |                                  |
|---------------------------------------------|----------------------------------|
| Nishinomiya Kyoritsu Neurosurgical Hospital | Hiroji Miyake                    |
| Nishio Municipal Hospital                   | Toshio Yokoe                     |
| Nishitokyo Central General Hospital         | Tatsuya Nakamura                 |
| Nissan Tamagawa Hospital                    | Takayuki Kubodera                |
| Nitobe Memorial Nakano General Hospital     | Mitsuhiro Hokari                 |
| Noshiro Kosei Medical Center                | Yasunari Otawara                 |
| Noto General Hospital                       | Cheho Park                       |
| Nozaki Tokushukai Hospital                  | Hidemitsu Nakagawa               |
| Obara Hospital                              | Souichi Obara                    |
| Obase Hospital                              | Haruki Takahashi                 |
| Obihiro Kosei General Hospital              | Masafumi Ohtaki                  |
| Odate Municipal General Hospital            | Atsuya Okubo                     |
| Ogaki Tokushukai Hospital                   | Katsuhiko Hayashi                |
| Ohnishi Neurological Center                 | Hideyuki Ohnishi, Yoshihiro Kuga |
| Ohta Nishinouchi Hospital                   | Masahisa Kawakami                |
| Oita Prefectural Hospital                   | Yu Takeda                        |
| Oitaken Koseiren Tsurumi Hospital           | Akihiko Kaga                     |
| Okaya City Hospital                         | Ryoichi Hayashi                  |
| Okayama City Hospital                       | Koji Tokunaga                    |
| Okayama Kyokuto Hospital                    | Hiroyuki Nakashima               |
| Okayama University Hospital                 | Isao Date                        |

|    |                                                                 |                                              |
|----|-----------------------------------------------------------------|----------------------------------------------|
| 1  |                                                                 |                                              |
| 2  |                                                                 |                                              |
| 3  |                                                                 |                                              |
| 4  |                                                                 |                                              |
| 5  | Okinawa Kyodo Hospital                                          | Koji Idomari, Nobuyuki Kaneko                |
| 6  | Okinawa Prefectural Nanbu Medical Center and Children's Medical |                                              |
| 7  | Center                                                          | Tomoaki Naganine                             |
| 8  |                                                                 |                                              |
| 9  | Okitama Public General Hospital                                 | Toshihiko Kinjo                              |
| 10 |                                                                 |                                              |
| 11 | Ome Municipal General Hospital                                  | Yoshiaki Takada, Osamu Tao                   |
| 12 |                                                                 |                                              |
| 13 | Omihachiman Community Medical Center                            | Masayuki Nakajima                            |
| 14 |                                                                 |                                              |
| 15 | Omori Red Cross Hospital                                        | Akira Isoshima                               |
| 16 |                                                                 |                                              |
| 17 | Omuta City Hospital                                             | Terukazu Kuramoto                            |
| 18 |                                                                 |                                              |
| 19 | Onomichi Municipal Hospital                                     | Shigeru Daido                                |
| 20 |                                                                 |                                              |
| 21 | Osaka Medical College                                           | Toshihiko Kuroiwa                            |
| 22 |                                                                 |                                              |
| 23 | Osaka National Hospital                                         | Kazuo Hashikawa                              |
| 24 |                                                                 |                                              |
| 25 | Osaka Neurological Institute                                    | Akatsuki Wakayama                            |
| 26 |                                                                 |                                              |
| 27 | Osaka Neurosurgical Hospital                                    | Naoki Hayashi                                |
| 28 |                                                                 |                                              |
| 29 | Osaka University Hospital                                       | Kouich Iwatsuki, Toshiki Yoshimine           |
| 30 |                                                                 |                                              |
| 31 | Osaki Citizen Hospital                                          | Masahiro Yoshida                             |
| 32 |                                                                 |                                              |
| 33 | Otaru General Hospital                                          | Yoshimasa Niiya                              |
| 34 |                                                                 |                                              |
| 35 | Otsu City Hospital                                              | Motohiro Takayama                            |
| 36 |                                                                 |                                              |
| 37 | Otsu Red Cross Hospital                                         | Masaaki Saiki                                |
| 38 |                                                                 |                                              |
| 39 | Rakuwakaiotowa Hospital                                         | Kazuo Yamamoto                               |
| 40 |                                                                 |                                              |
| 41 | Research Institute For Brain and Blood Vessels-Akita            | Junta Moroi, Taizen Nakase, Tatsuya Ishikawa |
| 42 |                                                                 |                                              |
| 43 | Saga-Ken Medical Centre Koseikan                                | Shuji Sakata, Hiroshi Sugimori               |
| 44 |                                                                 |                                              |
| 45 |                                                                 |                                              |
| 46 |                                                                 |                                              |

1  
2  
3  
4  
5  
6  
7  
8  
9  
10  
11  
12  
13  
14  
15  
16  
17  
18  
19  
20  
21  
22  
23  
24  
25  
26  
27  
28  
29  
30  
31  
32  
33  
34  
35  
36  
37  
38  
39  
40  
41  
42  
43  
44  
45  
46

Saiseikai Futsukaichi Hospital

Naoko Fujimura

Saiseikai Imabari Hospital

Osamu Nishizaki

Saiseikai Kumamoto Hospital

Toru Nishi

Saiseikai Kurihashi Hospital

Hiroshi Wanihuti

Saiseikai Kyoto Hospital

Nobukuni Murakami

Saiseikai Matsusaka General Hospital

Hiroto Murata

Saiseikai Nagasaki Hospital

Wataru Haraguchi

Saiseikai Toyama Hospital

Yukio Horie

Saiseikai Yahata General Hospital

Yuji Okamoto

Saiseikai Yokohamashi Tobu Hospital

Makoto Inaba

Saiseikaiustunomiya Hospital

Masashi Nakatsukasa

Saitama City Hospital

Atsuhiko Kojima

Saitama Medical Center

Kyoichi Nomura

Saitama Red Cross Hosoiat

Toshie, Yamamoto Kenji Takahashi

Sakai City Medical Center

Yoshikazu Nakajima

Saku Central Hospital Advanced Care Center

Takaaki Yoshida

Sanyudohospital

Yohei Kudoh

Sapporo Azabu Neurosurgical Hospital

Toshitaka Nakamura

Sapporo Medical University Hospital

Nobuhiro Mikuni

Sapporo Shiroishi Memorial Hospital

Akira Takahashi

Sapporoteishinkaihospital

Rokuya Tanikawa

|    |                                                |                                    |
|----|------------------------------------------------|------------------------------------|
| 1  |                                                |                                    |
| 2  |                                                |                                    |
| 3  |                                                |                                    |
| 4  |                                                |                                    |
| 5  | Sasebo Chuo Hospital                           | Seisaburo Sakamoto                 |
| 6  | Secomedic Hospital                             | Seichiro Hoshi                     |
| 7  |                                                |                                    |
| 8  | Seikeikai Hospital                             | Yoshinari Okumura                  |
| 9  |                                                |                                    |
| 10 | Seirei Memorial Hospital                       | Sinichi Okabe                      |
| 11 | Seirei Mikatahara General Hospital             | Haruhiko Sato                      |
| 12 |                                                |                                    |
| 13 | Sendai City Hospital                           | Hiroshi Karibe                     |
| 14 |                                                |                                    |
| 15 | Shakaiiryuhoujinzaidanshinwakaiyachiyobyuin    | Takashi Inoue                      |
| 16 | Shikoku Medical Center For Children and Adults | Kazuyuki Kuwayama                  |
| 17 |                                                |                                    |
| 18 | Shimane Prefectural Central Hospital           | Tatsuya Mizoue                     |
| 19 |                                                |                                    |
| 20 | Shimizu Hospital                               | Takashi Yoshida                    |
| 21 | Shimonoseki City Hospital                      | Takaharu Nakamura                  |
| 22 |                                                |                                    |
| 23 | Shin Koga Hospital                             | Tsutomu Hitotsumatsu               |
| 24 |                                                |                                    |
| 25 | Shin-Oyama City Hospital                       | Tomoaki Kameda                     |
| 26 | Shingu Municipal Medical Center                | Mitsukazu Nakai, Hiroshi Ishiguchi |
| 27 |                                                |                                    |
| 28 | Shinonoi General Hosapital                     | Masanobu Hokama                    |
| 29 |                                                |                                    |
| 30 | Shinsapporo Neurosurgical Hospital             | Akinori Yamamura                   |
| 31 | Shinshu University Hospital                    | Kazuhiro Hongo                     |
| 32 |                                                |                                    |
| 33 | Shinsuma General Hospital                      | Takeshi Kondoh                     |
| 34 |                                                |                                    |
| 35 | Shintakeohospital                              | Makoto Ichinose                    |
| 36 | Shizuoka Children's Hospital                   | Yuzuru Tashiro                     |
| 37 |                                                |                                    |
| 38 | Shizuoka City Shizuoka Hospital                | Seiji Fukazawa                     |
| 39 |                                                |                                    |
| 40 |                                                |                                    |
| 41 |                                                |                                    |
| 42 |                                                |                                    |
| 43 |                                                |                                    |
| 44 |                                                |                                    |
| 45 |                                                |                                    |
| 46 |                                                |                                    |

1  
2  
3  
4  
5  
6  
7  
8  
9  
10  
11  
12  
13  
14  
15  
16  
17  
18  
19  
20  
21  
22  
23  
24  
25  
26  
27  
28  
29  
30  
31  
32  
33  
34  
35  
36  
37  
38  
39  
40  
41  
42  
43  
44  
45  
46

|                                                                                     |                                  |
|-------------------------------------------------------------------------------------|----------------------------------|
| Shonan Kamakura General Hospital                                                    | Takahisa Mori                    |
| Showa Inan General Hospital                                                         | Shinsuke Muraoka                 |
| Showa University Fujigaoka Hospital                                                 | Tomoaki Terada                   |
| Shuuwa General Hospital                                                             | Tsuneo Shishido                  |
| Social Welfare Organization Saiseikai Imperial Gift Foundation Inc.                 |                                  |
| Osaka Saiseikai Ibaraki Hospital                                                    | Yasunobu Gotou                   |
| Social Welfare Organization Saiseikai Imperial Gift Foundation Inc. Yamagata Saisei | Sunao Takemura                   |
| South Miyagi Medical Center                                                         | Hiroaki Arai                     |
| Southern Tohoku Hospital                                                            | Zenichiro Watanabe               |
| St. Marianna University School of Medicine                                          | Yuichiro Tanaka                  |
| St.Luke's International Hospital                                                    | Yasunari Niimi                   |
| Steel Memorial Yawata Hospital                                                      | Shinya Yamaguchi, Akira Nakamizo |
| Suiseikai Kajikawa Hospital                                                         | Shinichi Wakabayashi             |
| Suwa Central Hospital                                                               | Hiroki Sato                      |
| Suwa Red Cross Hospital                                                             | Yukinari Kakizawa                |
| Syakaiiryohouzin Kouseikai Takai Hospital                                           | Tetsuya Morimoto                 |
| Tachibana Medical Corporation Higashisumiyoshi Morimoto Hospital                    | Naofumi Isono                    |
| Tachikawa General Hospital                                                          | Hiroki Takano, Hiroshi Abe       |
| Takamatsu Municipal Hospital                                                        | Norihito Shirakawa               |
| Takamatsu Red Cross Hospital                                                        | Masahiro Kagawa                  |

|    |                                                |                                   |
|----|------------------------------------------------|-----------------------------------|
| 1  |                                                |                                   |
| 2  |                                                |                                   |
| 3  |                                                |                                   |
| 4  |                                                |                                   |
| 5  | Takarazuka City Hospital                       | Eiichiro Mabuchi                  |
| 6  | Takarazuka Daiichi Hospital                    | -                                 |
| 7  |                                                |                                   |
| 8  | Takatsuki General Hospital                     | Kazusige Maeno                    |
| 9  |                                                |                                   |
| 10 | Takeda General Hospital Organization           | Takayuki Koizmi                   |
| 11 | Takeda Hospital                                | Waro Taki                         |
| 12 |                                                |                                   |
| 13 | Takikawa Neurosurgical Hospital                | Yusuke Nakagaki                   |
| 14 |                                                |                                   |
| 15 | Tanushimaru Central Hospital                   | Yoshihisa Matumoto                |
| 16 | Teinekeijinkai Hospital                        | Katuyuki Asaoka                   |
| 17 |                                                |                                   |
| 18 | Tenri Hospital                                 | Yoshinori Akiyama                 |
| 19 |                                                |                                   |
| 20 | Tenshindo Hetsugi Hospital                     | Tadao Kawamura                    |
| 21 | Teraoka Memorial Hospital                      | Atumi Takenobu                    |
| 22 |                                                |                                   |
| 23 | The Veritas Hospital                           | Masayuki Yokota                   |
| 24 |                                                |                                   |
| 25 | Tobata Kyoritu Hospital                        | Taketoshi Tuji                    |
| 26 | Tohoku University Hospital                     | Teiji Tominaga                    |
| 27 |                                                |                                   |
| 28 | Tokai University Hachioji Hospital             | Shigeru Nogawa, Masami Shimoda    |
| 29 |                                                |                                   |
| 30 | Toki General Hospital                          | Sinji Noda                        |
| 31 | Tokushima Red Cross Hospital                   | Hajimu Miyake                     |
| 32 |                                                |                                   |
| 33 | Tokushima University Hospital                  | Shinji Nagahiro, Junichiro Satomi |
| 34 |                                                |                                   |
| 35 | Tokuyama Central Hospital                      | Kunihiko Harada                   |
| 36 | Tokyo Dental College Ichikawa General Hospital | Sadao Suga                        |
| 37 |                                                |                                   |
| 38 | Tokyo General Hospital                         | Shinichi Numazawa                 |
| 39 |                                                |                                   |
| 40 |                                                |                                   |
| 41 |                                                |                                   |
| 42 |                                                |                                   |
| 43 |                                                |                                   |
| 44 |                                                |                                   |
| 45 |                                                |                                   |
| 46 |                                                |                                   |



1  
2  
3  
4  
5  
6  
7  
8  
9  
10  
11  
12  
13  
14  
15  
16  
17  
18  
19  
20  
21  
22  
23  
24  
25  
26  
27  
28  
29  
30  
31  
32  
33  
34  
35  
36  
37  
38  
39  
40  
41  
42  
43  
44  
45  
46

|                                                                    |                                      |
|--------------------------------------------------------------------|--------------------------------------|
| Tokyo Medical and Dental University                                | Taketoshi Maehara                    |
| Tokyo Medical University Hachioji Medical Center                   | Hiroyuki Jimbo, Jyunya Tsurukiri     |
| Tokyo Medical University Hospital                                  | Michihiro Kohno                      |
| Tokyo Metropolitan Hiroo Hospital                                  | Kensaku Yoshida                      |
| Tokyo Metropolitan Geriatric Hospital and Institute of Gerontology | Koji Matuoka                         |
| Tokyo Metropolitan Tama Medical Center                             | Takahiro Ota                         |
| Tokyo Saiseikai Central Hospital                                   | Haruhiko Hoshino                     |
| Tokyo Teisin Hospital                                              | Makoto Noguchi                       |
| Tokyo Women's Medical University                                   | Takakazu Kawamata                    |
| Tokyo Yamate Medical Center                                        | Yasuaki Takeda                       |
| Tomakomaihigashi Hospital                                          | Youichi Hashimoto                    |
| Tomei Atsugi Hopital                                               | Keiichirou Onitsuka                  |
| Tominaga Hospital                                                  | Masahiko Kitano                      |
| Tomishiro Central Hospital                                         | Jae-Hyun Son                         |
| Tottori Municipal Hospital                                         | Keiichi Akatsuka                     |
| Tottori University                                                 | Masamichi Kurosaki, Takashi Watanabe |
| Toyama City Hospital                                               | Miyamori Tadao                       |
| Toyama Prefectural Central Hospital                                | Hiroaki Hondo                        |
| Toyama Red Cross Hospital                                          | Kazumasa Yamatani, Kotaro Tsumura    |
| Toyama University Hospital                                         | Satoshi Kuroda                       |
| Toyohashi Municipal Hospital                                       | Hirofumi Oyama                       |

|    |                                                          |                                          |
|----|----------------------------------------------------------|------------------------------------------|
| 1  |                                                          |                                          |
| 2  |                                                          |                                          |
| 3  |                                                          |                                          |
| 4  |                                                          |                                          |
| 5  | Toyokawa City Hospital                                   | Takayuki Watanabe                        |
| 6  | Toyooka Hospital                                         | Kazuhiro Tanaka                          |
| 7  |                                                          |                                          |
| 8  | Tsuchiura Kyodo General Hospital                         | Shinji Yamamoto                          |
| 9  |                                                          |                                          |
| 10 | Tsukuba Medical Center Hospital                          | Kazuya Uemura                            |
| 11 | Tsuruoka Municipal Shonai Hospital                       | Hirosi Maruya, Kazuhiko Sato             |
| 12 |                                                          |                                          |
| 13 | Tsutiura Kyodo Hospital Namegata District Medical Center | Hitoshi Tabata                           |
| 14 |                                                          |                                          |
| 15 | Tsuyama Chuo Hospital                                    | Hideyuki Yoshida                         |
| 16 | Tyuubu Rousai Hospital                                   | Noriaki Matubara                         |
| 17 |                                                          |                                          |
| 18 | Ube Kohsan Industries Hospital                           | Takafumi Nishizaki                       |
| 19 |                                                          |                                          |
| 20 | Uki General Hospital                                     | Hiroshi Egami                            |
| 21 | University of Fukui Hospital                             | Osamu Yamamura                           |
| 22 |                                                          |                                          |
| 23 | University of Occupational and Environmental Health      | Junkoh Yamamoto                          |
| 24 |                                                          |                                          |
| 25 | University of The Ryukyus Hospital                       | Shogo Ishiuchi                           |
| 26 |                                                          |                                          |
| 27 |                                                          | Yuji Matsumaru, Akira Matsumura, Tetsuya |
| 28 | University of Tsukuba Hospital                           | Yamamoto                                 |
| 29 |                                                          |                                          |
| 30 | University of Yamanashi                                  | Hiroyuki Kinouchi                        |
| 31 |                                                          |                                          |
| 32 | Urasoe General Hospital                                  | Susumu Mearu                             |
| 33 |                                                          |                                          |
| 34 | Ushioda General Hospital                                 | Hitoshi Ozawa                            |
| 35 | Uwajima City Hospital                                    | Kiichiro Zenke                           |
| 36 |                                                          |                                          |
| 37 | Wakayama Medical University Hospital                     | Naoyuki Nakao                            |
| 38 | Wakayama Rosai Hospital                                  | Toshikazu Kuwata                         |
| 39 |                                                          |                                          |
| 40 |                                                          |                                          |
| 41 |                                                          |                                          |
| 42 |                                                          |                                          |
| 43 |                                                          |                                          |
| 44 |                                                          |                                          |
| 45 |                                                          |                                          |
| 46 |                                                          |                                          |

1  
2  
3  
4  
5  
6  
7  
8  
9  
10  
11  
12  
13  
14  
15  
16  
17  
18  
19  
20  
21  
22  
23  
24  
25  
26  
27  
28  
29  
30  
31  
32  
33  
34  
35  
36  
37  
38  
39  
40  
41  
42  
43  
44  
45  
46

|                                            |                                     |
|--------------------------------------------|-------------------------------------|
| Wakayama-Seikyo Hospital                   | Teruyuki Habu                       |
| Yaizu City Hospital                        | Seiya Takehara                      |
| Yamagata City Hospital Saiseikan           | Rei Kondo                           |
| Yamagata Prefectural Central Hospital      | Takashi Kumagai                     |
| Yamagata Prefectural Shinjo Hospital       | Keiten So                           |
| Yamagata University Hospital               | Yukihiko Sonoda                     |
| Yamaguchi Prefectural Grand Medical Center | Manabu Urakawa                      |
| Yamaguchi Red Cross Hospital               | Yasuhiro Hamada                     |
| Yamaguchi University Hospital              | Michiyasu Suzuki                    |
| Yamanashi Prefectural Central Hospital     | Shin Nakano, Hidehito Koizumi       |
| Yamanashi Redcross Hospital                | Hiroshi Ozawa                       |
| Yamanashikouseibyuin                       | Mikito Uchida                       |
| Yamato Municipal Hospital                  | Masaru Yamada                       |
| Yao Tokushukai General Hospital            | Takashi Turuno                      |
| Yatsuo General Hospital                    | Ryouichi Masuda                     |
| Yawata Medical Center                      | Makoto Kimura                       |
| Yayoigaoka Kage Hospital                   | Shin-Ichiro Ishihara                |
| Yodogawa Christian Hospital                | Masashi Morikawa                    |
| Yokohama City Minato Red Cross Hospital    | Yasunori Takemoto, Hiroaki Tanaka   |
| Yokohama City University Hospital          | Hidetoshi Murata, Nobutaka Kawahara |
| Yokohama City University Medical Center    | Katsumi Sakata                      |

For peer review only

1  
2  
3  
4 Yokohamasinmidorihospital

Endo Sumio

5  
6 Yonezawa City Hospital

Tooru Sasaki

7  
8 Yoshida Hospital

Yasuhisa Yoshida

9  
10 Yuaikaihospital

Yoshihumi Teramoto

11  
12  
13  
14  
15  
16  
17  
18  
19  
20  
21  
22  
23  
24  
25  
26  
27  
28  
29  
30  
31  
32  
33  
34  
35  
36  
37  
38  
39  
40  
41  
42  
43  
44  
45  
46

For peer review only

1  
2  
3  
4  
5  
6  
7  
8  
9  
10  
11  
12  
13  
14  
15  
16  
17  
18  
19  
20  
21  
22  
23  
24  
25  
26  
27  
28  
29  
30  
31  
32  
33  
34  
35  
36  
37  
38  
39  
40  
41  
42  
43  
44  
45  
46  
47  
48  
49  
50  
51  
52  
53  
54  
55  
56  
57  
58  
59  
60STROBE Statement—Checklist of items that should be included in reports of *cross-sectional studies*

|                              | Item No | Recommendation                                                                                                                                                                                    | Page No |
|------------------------------|---------|---------------------------------------------------------------------------------------------------------------------------------------------------------------------------------------------------|---------|
| <b>Title and abstract</b>    | 1       | (a) Indicate the study's design with a commonly used term in the title or the abstract                                                                                                            | 3       |
|                              |         | (b) Provide in the abstract an informative and balanced summary of what was done and what was found                                                                                               | 4       |
| <b>Introduction</b>          |         |                                                                                                                                                                                                   |         |
| Background/rationale         | 2       | Explain the scientific background and rationale for the investigation being reported                                                                                                              | 5       |
| Objectives                   | 3       | State specific objectives, including any prespecified hypotheses                                                                                                                                  | 6       |
| <b>Methods</b>               |         |                                                                                                                                                                                                   |         |
| Study design                 | 4       | Present key elements of study design early in the paper                                                                                                                                           | 6       |
| Setting                      | 5       | Describe the setting, locations, and relevant dates, including periods of recruitment, exposure, follow-up, and data collection                                                                   | 6       |
| Participants                 | 6       | (a) Give the eligibility criteria, and the sources and methods of selection of participants                                                                                                       | 6       |
| Variables                    | 7       | Clearly define all outcomes, exposures, predictors, potential confounders, and effect modifiers. Give diagnostic criteria, if applicable                                                          | 7       |
| Data sources/<br>measurement | 8*      | For each variable of interest, give sources of data and details of methods of assessment (measurement). Describe comparability of assessment methods if there is more than one group              | 6,7     |
| Bias                         | 9       | Describe any efforts to address potential sources of bias                                                                                                                                         | 11      |
| Study size                   | 10      | Explain how the study size was arrived at                                                                                                                                                         | 8       |
| Quantitative variables       | 11      | Explain how quantitative variables were handled in the analyses. If applicable, describe which groupings were chosen and why                                                                      | 7       |
| Statistical methods          | 12      | (a) Describe all statistical methods, including those used to control for confounding                                                                                                             | 7       |
|                              |         | (b) Describe any methods used to examine subgroups and interactions                                                                                                                               | 7       |
|                              |         | (c) Explain how missing data were addressed                                                                                                                                                       | 10      |
|                              |         | (d) If applicable, describe analytical methods taking account of sampling strategy                                                                                                                | -       |
|                              |         | (e) Describe any sensitivity analyses                                                                                                                                                             | -       |
| <b>Results</b>               |         |                                                                                                                                                                                                   |         |
| Participants                 | 13*     | (a) Report numbers of individuals at each stage of study—eg numbers potentially eligible, examined for eligibility, confirmed eligible, included in the study, completing follow-up, and analysed | 11      |
|                              |         | (b) Give reasons for non-participation at each stage                                                                                                                                              | 14      |
|                              |         | (c) Consider use of a flow diagram                                                                                                                                                                | -       |
| Descriptive data             | 14*     | (a) Give characteristics of study participants (eg demographic, clinical, social) and information on exposures and potential confounders                                                          | 11-14   |
|                              |         | (b) Indicate number of participants with missing data for each variable of interest                                                                                                               | 14      |
| Outcome data                 | 15*     | Report numbers of outcome events or summary measures                                                                                                                                              | 11-14   |
| Main results                 | 16      | (a) Give unadjusted estimates and, if applicable, confounder-adjusted estimates and their precision (eg, 95% confidence interval). Make clear                                                     | 11-13   |

|                          |    |                                                                                                                                                                            |       |
|--------------------------|----|----------------------------------------------------------------------------------------------------------------------------------------------------------------------------|-------|
|                          |    | which confounders were adjusted for and why they were included                                                                                                             |       |
|                          |    | (b) Report category boundaries when continuous variables were categorized                                                                                                  | 11-13 |
|                          |    | (c) If relevant, consider translating estimates of relative risk into absolute risk for a meaningful time period                                                           | 11-13 |
| Other analyses           | 17 | Report other analyses done—eg analyses of subgroups and interactions, and sensitivity analyses                                                                             | 13    |
| <b>Discussion</b>        |    |                                                                                                                                                                            |       |
| Key results              | 18 | Summarise key results with reference to study objectives                                                                                                                   | 14    |
| Limitations              | 19 | Discuss limitations of the study, taking into account sources of potential bias or imprecision. Discuss both direction and magnitude of any potential bias                 | 13,14 |
| Interpretation           | 20 | Give a cautious overall interpretation of results considering objectives, limitations, multiplicity of analyses, results from similar studies, and other relevant evidence | 15-17 |
| Generalisability         | 21 | Discuss the generalisability (external validity) of the study results                                                                                                      | 15-17 |
| <b>Other information</b> |    |                                                                                                                                                                            |       |
| Funding                  | 22 | Give the source of funding and the role of the funders for the present study and, if applicable, for the original study on which the present article is based              | 19    |

\*Give information separately for exposed and unexposed groups.

**Note:** An Explanation and Elaboration article discusses each checklist item and gives methodological background and published examples of transparent reporting. The STROBE checklist is best used in conjunction with this article (freely available on the Web sites of PLoS Medicine at <http://www.plosmedicine.org/>, Annals of Internal Medicine at <http://www.annals.org/>, and Epidemiology at <http://www.epidem.com/>). Information on the STROBE Initiative is available at [www.strobe-statement.org](http://www.strobe-statement.org).
