# Supplementary material for: Temporal trends and geographical disparities in comprehensive stroke centre capabilities in Japan from 2010 to 2018
Source: PubMed Central journal article supplement — BMJ Open. 2020 Aug 6;10(8):e033055. doi: 10.1136/bmjopen-2019-033055 (PMC7412582; doi:10.1136/bmjopen-2019-033055), 2020-08-06
Supplement: bmjopen-2019-033055supp001.pdf [file bmjopen-2019-033055supp001.pdf]

**Supplemental material**

[eTable 1. Multivariable analysis of the impact of the hospital characteristics on one-point increase of the CSC score](#)

[eTable 2. Univariable analysis of association between consecutively participating hospitals in all three surveys and the others](#)

[Supplemental Appendix 1. List of the J-ASPECT Study Collaborators.](#)

eTable 1 Multivariable analysis of the impact of the hospital characteristics on one-point increase of the CSC score

| Hospital-related factors in 2010 | Odds | 95%CI      | P value          |
|----------------------------------|------|------------|------------------|
| Hospital locations               |      |            |                  |
| MEA central                      | ref. |            |                  |
| MEA outlying                     | 1.35 | 0.36-2.48  | 0.339            |
| McEA                             | 0.78 | 0.35-1.75  | 0.549            |
| CSC score in 2010                | 0.83 | 0.76-0.91  | <b>&lt;0.001</b> |
| Academic hospital                | 1.29 | 0.52-3.24  | 0.582            |
| DPC hospital                     | 0.72 | 0.39-1.34  | 0.302            |
| Number of beds                   |      |            |                  |
| 1-99                             | ref. |            |                  |
| 100-299                          | 1.1  | 0.36-3.41  | 0.868            |
| 300-499                          | 1.82 | 0.60-5.48  | 0.285            |
| ≥500                             | 3.81 | 1.16-12.54 | <b>0.028</b>     |
| Annual stroke case volume        |      |            |                  |

|                                      |      |           |              |
|--------------------------------------|------|-----------|--------------|
| 1-99                                 | ref. |           |              |
| 100-199                              | 1.68 | 0.67-4.18 | 0.267        |
| 200-299                              | 2.47 | 0.92-6.61 | 0.072        |
| ≥300                                 | 3.17 | 1.16-8.66 | <b>0.024</b> |
| Number of stroke physicians, tertile |      |           |              |
| T1 (0-4)                             | ref. |           |              |
| T2 (4-8)                             | 1.12 | 0.58-2.16 | 0.745        |
| T3 (≥9)                              | 1.35 | 0.57-3.21 | 0.492        |

eTable 2 Univariable analysis of association between consecutively participating hospitals in all three surveies and the others

|                      | All Hsps. in 2010<br>(n=749) | Consecutively<br>participating Hsps.<br>(n=323) | Other Hsps.<br>(n=426) | p value |
|----------------------|------------------------------|-------------------------------------------------|------------------------|---------|
| Hospital location    |                              |                                                 |                        | <0.001  |
| MEA central          | 381 (50.9)                   | 193 (59.8)                                      | 188 (44.1)             |         |
| MEA outlying         | 239 (31.9)                   | 83 (25.7)                                       | 156(36.6)              |         |
| McEA                 | 102 (13.6)                   | 38 (11.8)                                       | 64 (15.0)              |         |
| Unclassified         | 27 (3.6)                     | 9 (2.8)                                         | 18 (4.2)               |         |
| CSC score at 2010    |                              |                                                 |                        |         |
| median (IQR)         | 14 (11, 18)                  | 16 (13, 19)                                     | 13 (10, 17)            | <0.001  |
| Academic hospital    | 90 (12.1)                    | 61 (18.9)                                       | 29 (6.8)               | <0.001  |
| DPC hospital         | 553 (73.8)                   | 237 (73.4)                                      | 316 (74.2)             | 0.804   |
| Number of beds       |                              |                                                 |                        | <0.001  |
| -99                  | 50 (6.7)                     | 19 (5.9)                                        | 31 (7.3)               |         |
| 100-299              | 232 (31.0)                   | 75 (23.2)                                       | 157 (36.9)             |         |
| 300-499              | 260 (34.7)                   | 105 (32.5)                                      | 155 (36.4)             |         |
| ≥500                 | 207 (27.6)                   | 124 (38.4)                                      | 83 (19.5)              |         |
| Annual stroke volume |                              |                                                 |                        | <0.001  |
| -99                  | 129 (17.2)                   | 36 (11.2)                                       | 93 (21.8)              |         |

|                                                 |            |            |            |        |
|-------------------------------------------------|------------|------------|------------|--------|
| 100-199                                         | 199 (26.5) | 76 (23.5)  | 123 (28.9) |        |
| 200-299                                         | 155 (20.7) | 70 (21.7)  | 85 (20.0)  |        |
| ≥300                                            | 228 (30.4) | 127 (39.3) | 101 (23.7) |        |
| N/A                                             | 38 (5.1)   | 14 (4.3)   | 24 (5.6)   |        |
| Number of stroke<br>physicians, median<br>(IQR) | 4 (3, 7)   | 5 (3, 9)   | 4 (2, 6)   | <0.001 |

---

\*DPC: Diagnostic Procedure Combination, Hsp: hospital, MEA: metropolitan, McEA: micropolitan

### Supplemental Appendix 1. List of the J-ASPECT Study Collaborators.

All Contributors were involved in collection of data.

| Hospitals                                | Responsible persons               |
|------------------------------------------|-----------------------------------|
| Ainomiyako Neurosurgery Hospital         | Isao Sasaki                       |
| Aizawa Hospital                          | Takao Hasimoto                    |
| Akita University Hospital                | Hiroaki Shimizu                   |
| Akocity Hospital                         | Minoru Asahi                      |
| Almeida Memorial Hospital                | Makoto Goda                       |
| Aomori City Hospital                     | Atsuhito Takemura                 |
| Aomori Prefectural Central Hospital      | Tatsuya Sasaki                    |
| Asahi General Hospital                   | Saburo Watanabe                   |
| Ashiya Municipal Hospital                | Seiko Kataoka                     |
| Atsuchi Neurosurgical Hospital           | Kouji Takasaki                    |
| Ayabe City Hospital                      | Kouji Shiga                       |
| Baba Memorial Hospital                   | Hidehuku Gi                       |
| Bellland General Hospital                | Ryunosuke Uranishi                |
| Beppu Medical Center                     | Yasuyuki Nagai                    |
| Chiba Cancer Center                      | Toshihiko Iuchi                   |
| Chiba Cerebral and Cardiovascular Center | Toshio Machida, Junichiro Shimada |
| Chiba Neurosurgical Clinic               | Kenji Wakui                       |
| Chiba Rosai Hospital                     | Takashi Saegusa                   |

|                                                              |                                   |
|--------------------------------------------------------------|-----------------------------------|
| Chiba Tokushukai Hospital                                    | Isao Kitahara                     |
| Chidoribashi Hospital                                        | Yasushi Ejima                     |
| Chigasaki Municipal Hospital                                 | Takaakira Yokoyama                |
| Chikamori Hospital (Chikamori Health Care Group)             | Satoru Hayashi                    |
| Chutoen General Medical Center                               | Toshikazu Ichihashi               |
| Corporate Medical Association Shoikai Kasai Shoikai Hospital | Junichi Harashina                 |
| Daiichitowakaihospital                                       | Tsugumichi Ichioka                |
| Daiyukai General Hospital                                    | Takayuki Kato, Shinichi Shirakami |
| Date Red Cross Hospital                                      | Takeshi Matsuoka                  |
| Department of Neurosurgery Shiroyama Hospital                | Kenichi Murao                     |
| Dokkyo Medical University Koshigaya Hospital                 | Akio Hyodo, Tomoyuki Miyamoto     |
| Doutounoushinkeigekabyouinn                                  | Teruo Kimura                      |
| Ebina General Hospital                                       | Tomonori Kobayashi                |
| Ehime Prefectural Central Hospital                           | Shinji Iwata                      |
| Faculty of Medicine, Saga University                         | Tatsuya Abe                       |
| Faculty of Medicine, University of Miyazaki                  | Hideo Takeshima                   |
| Fuchu Hospital                                               | Kazunori Yamanaka                 |
| Fuji City General Hospital                                   | Satoru Morooka                    |
| Fujii Neurosurgical Hospital                                 | Hideo Kunimine                    |
| Fujita General Hospital                                      | Satoshi Taira                     |
| Fujita Health University Hospital                            | Ichiro Nakahara, Yuichi Hirose    |

|                                       |                           |
|---------------------------------------|---------------------------|
| Fujiyoshida Municipal Hospital        | Syogo Imae                |
| Fukaya Red Cross Hospital             | Hirochiyo Wada            |
| Fukuchiyama City Hospital             | Mamoru Murakami           |
| Fukui Katsuyama General Hospital      | Masanori Kabuto           |
| Fukuoka Seisyukai Hospital            | Masaharu Tani, Isao Inoue |
| Fukuoka Tokushukai Medical Center     | Hidenori Yoshida          |
| Fukuoka University Chikushi Hospital  | Kiyoshi Kazekawa          |
| Fukuoka University Hospital           | Tooru Inoue               |
| Fukuoka Wajiro Hospital               | Kouzou Fukuyama           |
| Fukuokashinmizumaki Hospital          | Shigenari Kin             |
| Fukushima Medical University Hospital | Taku Sato                 |
| Fukushima Red Cross Hospital          | Yoichi Watanabe           |
| Gifu Municipal Hospital               | Tetsuya Tanigawara        |
| Gifu Prefectural Tajimi Hospital      | Junki Ito                 |
| Gifu University Hospital              | Toru Iwama                |
| Hachisuga Hospital                    | Yoshihisa Maeda           |
| Hakodate Central General Hospital     | Makoto Takeda             |
| Hakodate Municipal Hospital           | Jun Niwa                  |
| Hakodate Neurosurgical Hospital       | Mikio Nishiya             |
| Hakujuji Hospital                     | Shuji Hayasi              |
| Hamamatsu Medical Center              | Teiji Nakayama            |



|                                                               |                                    |
|---------------------------------------------------------------|------------------------------------|
| Hamanomachi Hospital                                          | Koichirou Matsukado                |
| Harasanshin Hospital                                          | Tadahisa Shono                     |
| Hata Kenmin Hospital                                          | Hiroyuki Nishimura                 |
| Higashiosaka City Medical Center                              | Takatoshi Fujimoto, Ryo Tamaki     |
| Higashitotsuka Memorial Hospital                              | Satoshi Utsuki                     |
| Higashiyamato Hospital                                        | Ikuo Kobayashi, Hirotoshi Ohtaka   |
| Hirosaki Stroke and Rehabilitation Center                     | Takamitsu Uchizawa                 |
| Hirosaki University Hospital                                  | Hiroki Ohkuma                      |
| Hiroshima City Hiroshima Citizens Hospital                    | Shigeki Nishino                    |
| Hiroshima Prefectural Hospital                                | Atsushi Tominaga                   |
| Hiroshima Red Cross Hospital & Atomic Bomb Survivors Hospital | Masayuki Sumida                    |
| Hiroshima University Hospital                                 | Takahito Okazaki, Shirou Aoki      |
| Hito Medical Center                                           | Naoki Shinohara                    |
| Hokkaido Medical Center                                       | Satoshi Ushikoshi                  |
| Hokkaido University Dept. Neurosurgery                        | Syunsuke Terasaka, Kiyohiro Houkin |
| Hokushikai Megumino Hospital                                  | Mitsunobu Kaijima                  |
| Hokuto Hospital                                               | Kimito Kondo, Kazumi Nitta         |
| Hospital                                                      | Toshiki Ikeda, Hidetoshi Ooigawa   |
| Hospital Nanbu Tokushukai                                     | Tutomu Kadekaru                    |
| Hukuoka City Hospital                                         | Katsuyuki Hirakawa                 |
| Hyogo College of Medicine                                     | Shinichi Yoshimura                 |

|                                                               |                                   |
|---------------------------------------------------------------|-----------------------------------|
| Hyogo Prefectural Awaji Medical Center                        | Yoshio Sakagami                   |
| Hyogo Prefectural Kakogawa Medical Center                     | Hideo Aihara                      |
| Hyogokenritu_Nishinomiya_Hospital                             | Takayuki Sakaki                   |
| Ibaraki Prefectural Central Hospital                          | Hiroko Oyama, Yuuji Kujiraoka     |
| Ibaraki Seinan Medical Center Hospital                        | Keishi Fujita                     |
| Iida Municipal Hospital                                       | Sumio Kobayashi                   |
| Imari Arita Kyoritsu Hospital                                 | Nobuaki Momozaki                  |
| Ina Central Hospital                                          | Atsushi Sato                      |
| Inagi Municipal Hospital                                      | Hideki Murakami, Tatsuo Iwasita   |
| Institute of Brain and Blood Vessels Mihara Memorial Hospital | Akazi Kazunori, Takao Kanzawa     |
| Irixyouhoujin Okinawatokushukai Uwajimatokushukai Hospital    | Hikomichi Sadashima               |
| Iryohojin Seiwakai Wada Hospital                              | Shiro Miyata                      |
| Iryouhoujinsyadanjinmeikai Akiyamanousinnkeigeka              | Takekazu Akiyama                  |
| Iryouhouzinsyadan Meihoukai                                   |                                   |
| Yokohamashintoshinoshinkeigekabyuin                           | Akihiro Nemoto, Masafumi Morimoto |
| Isahaya General Hospital                                      | Yoshihiro Nishiura                |
| Ise Red Cross Hospital                                        | Fumitaka Miya, Masunari Sibata    |
| Ishikawa Prefectural Central Hospital                         | Yutaka Hayashi                    |
| Ishinomaki Red Cross Hospital                                 | Syuichi Ishikawa                  |
| Itabashi Chuo Medical Center                                  | Miura Naohisa                     |
| Itami Kousei Neurosurgical Hospital                           | Shinya Noda                       |

|                                                                               |                                   |
|-------------------------------------------------------------------------------|-----------------------------------|
| Iwaki Kyoritsu General Hospital                                               | Yasuhiro Suzuki                   |
| Iwata Municipal General Hospital                                              | Shinji Amano                      |
| Iwate Medical University                                                      | Kuniaki Ogasawara                 |
| Iwate Prefectural Central Hospital                                            | Takayuki Sugawara                 |
| Iwate Prefectural Iwai Hospital                                               | Keiichi Saitou                    |
| Iwate Prefectural Kuji Hospital                                               | Kazuyuki Miura                    |
| Iwate Prefectural Ninohe Hospital                                             | Akinori Yabuta                    |
| Izumi Hospital                                                                | Makoto Hasebe                     |
| Izumino Hospital                                                              | Masato Seike                      |
| Japan Community Health Care Organization Chukyo Hospital                      | Akira Ikeda                       |
| Japan Community Health Care Organization Kyushu Hospital                      | Satoshi Inoha                     |
| Japan Community Health Care Organization Tokyo Takanawa Hospital              | Hirofumi Hiyama                   |
| Japan Organization of Occupational Health and Safety Kumamoto Rousai Hospital | Hiromasa Tsuiki, Shigeo Yamashiro |
| Japanese Red Cross Akita Hospital                                             | Keiichi Nishimaki                 |
| Japanese Red Cross Asahikawa Hospital                                         | Katsumi Takizawa, Kenichi Makino  |
| Japanese Red Cross Fukuoka Hospital                                           | Hitoshi Tsugu, Jiro Kitayama      |
| Japanese Red Cross Kitami Hospital                                            | Nozomi Suzuki                     |
| Japanese Red Cross Kumamoto Hospital                                          | Shu Hasegawa, Tadashi Terasaki    |
| Japanese Red Cross Maebashi Hospital                                          | Ken Asakura                       |

|                                               |                            |
|-----------------------------------------------|----------------------------|
| Japanese Red Cross Medical Center             | Ichiro Suzuki              |
| Japanese Red Cross Society Hachinohe Hospital | Hiromu Konno               |
| Japanese Red Cross Takayama Hospital          | Katsunobu Takenaka         |
| Japanese Redcross Fukui Hospital              | Hiroki Toda, Taketo Hatano |
| Jcho Hitoyoshi Medical Center                 | Keizou Yamamoto            |
| Jcho Kobe Central Hospital                    | Keigo Matsumoto            |
| Jcho Kumamoto General Hospital                | Kazunari Koga              |
| Jcho Nankai Medical Center                    | Takamitsu Hikawa           |
| Juntendo Universty Hospital                   | Hajime Arai                |
| Kaetsu Hospital                               | Kazuaki Awamori            |
| Kaga Medical Center                           | Naoki Shirasaki            |
| Kagawa Rosai Hospital                         | Kimihiko Yoshino           |
| Kagawa University Hospital                    | Takashi Tamiya             |
| Kagoshima City Hospital                       | Kazuho Hirahara            |
| Kagoshima Prefectural Kanoya Medical Center   | Shunichi Tanaka            |
| Kagoshima Tokushukai Hospital                 | Teruaki Kawano             |
| Kagoshima University Hospital                 | Sei Sugata, Kazunori Arita |
| Kan-Etsu Hospital                             | Masahiko Tanaka            |
| Kanazawa Medical Univercity                   | Shunsuke Shiraga           |
| Kanazawa Neurosurgical Hospital               | Syuji Sato                 |
| Kanazawa University Hospital                  | Mitsutoshi Nakada          |

|                                                        |                             |
|--------------------------------------------------------|-----------------------------|
| Kaneda Hospital                                        | Kimihisa Kinoshita          |
| Kanmon Medical Center                                  | Katsuhiro Yamashita         |
| Kano Hospital                                          | Nakazawa Kazutomo           |
| Kansai Electric Power Hospital                         | Yasuhiro Fujimoto           |
| Kansai Medical University Hospital                     | Kunikazu Yoshimura          |
| Kanto Rosai Hospital                                   | Takayuki Tachizawa          |
| Kasaoka Daiichi Hospital                               | Akira Watanabe              |
| Kashiwaba Neurosurgical Hospital                       | Tetsuyuki Yoshimoto         |
| Kasugai Municipal Hospital                             | Naoto Kuwayama              |
| Kawasaki Medical School Hospital                       | Masaaki Uno                 |
| Kazuno Kosei Hospital                                  | Masayuki Sasou              |
| Keiju Medical Center                                   | Sotaro Higashi              |
| Keishunkai Medical Corporation Kobari General Hospital | Naoaki Sato                 |
| Kenwakai Hospital                                      | Masakazu Kitahara           |
| Kenwakai Otemati Hospital                              | Hiroshi Yoneda              |
| Kieikai Hospital                                       | Satoshi Suzuki              |
| Kindai University Hospital                             | Toshiho Ohtsuki, Amami Kato |
| Kindai University Sakai Hospital                       | Yusaku Nakamura             |
| Kiryu Kosei General Hospital                           | Satoshi Magarisawa          |
| Kishiwada City Hospital                                | Kenji Hashimoto             |
| Kishiwada Tokushukai Hospital                          | Hiroyuki Matsumoto          |

|                                           |                                      |
|-------------------------------------------|--------------------------------------|
| Kita-Harima Medical Center                | Hirotooshi Hamaguchi, Shigeru Miyake |
| Kitakami Saiseikai Hospital               | Tomohiko Satou                       |
| Kitakyusyu General Hospital               | Masaru Idei                          |
| Kitakyusyu Municipal Medical Center       | Masahiro Mizoguchi                   |
| Kitamurayama Hospital                     | Eiichiro Kamatsuka                   |
| Kitasato University School of Medicine    | Toshihiro Kumabe                     |
| Kobe City Medical Center General Hospital | Nobuyuki Sakai                       |
| Kobe Ekisaikai Hospital                   | Takashi Tominaga                     |
| Kobe Red Cross Hospital                   | Haruo Yamashita                      |
| Kobe University Hospital                  | Eiji Kohmura, Tatsushi Toda          |
| Kochi Health Sciences Center              | Tsuyoshi Oota, Masanori Morimoto     |
| Kochi Medical School Hospital             | Tetsuya Ueba                         |
| Kohka Public Hospital                     | Kazuyoshi Watanabe                   |
| Kohnan Hospital                           | Hidenori Endo                        |
| Kohsei General Hospital                   | Kenjirou Fujiwara, Minoru Nakagawa   |
| Kokura Memorial Hospital                  | Taketo Hatano, Akira Ishii           |
| Komaki City Hospital                      | Toshinori Hasegawa                   |
| Komatsu Municipal Hospital                | Hisashi Nitta                        |
| Komoro Kosei General Hospital             | Takayuki Kuroyanagi                  |
| Koshigaya Municipal Hospital              | Akira Tunoda                         |
| Koto Memorial Hospital                    | Hisao Hirai                          |

|                                                                                 |                                         |
|---------------------------------------------------------------------------------|-----------------------------------------|
| Koyama Memorial Hospital                                                        | Takuya Kawai                            |
| Kugayama Hospital                                                               | Mitsuyuki Fujitsuka                     |
| Kumamoto City Hospital                                                          | Akira Takada, Seiji Tajiri              |
| Kurashiki Central Hospital                                                      | Masaki Chin                             |
| Kurashiki Heisei Hospital                                                       | Hidemiti Sasayama                       |
| Kurosawa Hospital                                                               | Sigehiro Ohmori                         |
| Kurosishi General Hospital                                                      | Seiko Hasegawa                          |
| Kurosu Hospital                                                                 | Kazuhiro Kikuchi, Mikio Teduka          |
| Kurume University Hospital                                                      | Motohiro Morioka                        |
|                                                                                 | Yoshiko Unno, Hiroki Yoshida , Teruyuki |
| Kyorin University Hospital                                                      | Hirano                                  |
| Kyoritsu Hospital                                                               | Masayuki Yokota                         |
| Kyoto Okamoto Memorial Hospital                                                 | Minoru Kidooka                          |
| Kyoto Second Red Cross Hospital                                                 | Hiroshi Tenjin                          |
| Kyoto Univerisity Hospital                                                      | Susumu Miyamoto                         |
| Kyoto Yamashiro General Medical Center                                          | Yoshihiro Iwamoto                       |
| Kyotokatsura Hospital                                                           | Yasumasa Yamamoto                       |
| Kyotomin-Iren Chuohospital                                                      | Yuko Shikata                            |
| Kyushu Central Hospital of The Mutual Aid Association of Public School Teachers | Hitonori Takaba                         |
| Kyushu Rosai Hospital                                                           | Sei Haga                                |

|                                                                                |                    |
|--------------------------------------------------------------------------------|--------------------|
| Kyushu University Hospital                                                     | Koji Iihara        |
| Local Incorporated Administrative Agency Tokushima Prefecture                  |                    |
| Naruto Hospital                                                                | Masahito Agawa     |
| Makita General Hospital                                                        | Yoshinori Arai     |
| Maruko Central Hospital                                                        | Toshiyuki Tsukada  |
| Matsushita Memorial Hospital                                                   | Nozomu Murai       |
| Matsuyama Shimin Hospital                                                      | Masakazu Suga      |
| Mazda Hospital                                                                 | Kawamoto Yukihiko  |
| Medical Corporation Ijinkai Nakamura Memorial Hospital                         | Kenji Kamiyama     |
| Medical Corporation Meiseikai Abashiri Neurosurgicalrehabilitation<br>Hospital | Naoto Izumi        |
| Meitetsu Hospital                                                              | Youtarou Takeuchi  |
| Midorigaoka Hospital                                                           | Motohiro Arai      |
| Mie University Hospital                                                        | Hidenori Suzuki    |
| Mimihara General Hospital                                                      | Shinji Okumura     |
| Minamata City General Hospital and Medical Center                              | Makoto Yoshikawa   |
| Minami Wakayama Medical Center                                                 | Yoshinari Nakamura |
| Minato Medical Coop-Kyoritsu General Hospital                                  | Hisashi Tanaka     |
| Mito Kyodo General Hospital                                                    | Yasusi Sibata      |
| Mitoyogeneralhospital                                                          | Tetsuya Masaoka    |
| Mitsugi General Hospital                                                       | Takashi Matsuoka   |



|                                             |                              |
|---------------------------------------------|------------------------------|
| Miyakonojo Medical Association Hospital     | Hajime Ohta                  |
| Miyoshi Central Hospital                    | Osamu Hamasaki               |
| Moriguchi-Ikuno Memorial Hospital           | Misao Nishikawa              |
| Morioka Red Cross Hospital                  | Naohiko Kubo                 |
| Munakata Suikokai General Hospital          | Yosimasa Kinosita            |
| Muroran City General Hospital               | Hiroshi Ooyama               |
| Nagahama City Hospital                      | Taro Komuro                  |
| Nagano Municipal Hospital                   | Yoshikazu Kusano             |
| Nagaoka Chuo General Hospital               | Shigekazu Takeuchi           |
| Nagasaki Kawatana Medical Center            | Ei-Ichirou Urasaki           |
| Nagasaki University Hospital                | Takayuki Matsuo              |
| Nagasaki Shimabara Hospital                 | Yoshiharu Tokunaga           |
| Nagoya City University                      | Mitsuhiro Mase               |
| Nagoya Daini Red Cross Hospital             | Yukio Seki, Keizo Yasui      |
| Nagoya University Hospital                  | Yoshio Araki                 |
| Naha City Hospital                          | Naoki Tomiyama               |
| Nakamura Memorial South Hospital            | Taiichiro Watanabe, Koji Oka |
| Nakatsu Municipal Hospital                  | Hiromichi Koga               |
| Nara Medical University                     | Hiroyuki Nakase              |
| Narita Red Cross Hospital                   | Michio Nakamura              |
| National Cerebral and Cardiovascular Center | Jun Takahashi                |

|                                                           |                               |
|-----------------------------------------------------------|-------------------------------|
| National Hospital Organization Chiba Medical Center       | Hirokazu Tanno                |
| National Hospital Organization Hamada Medical Center      | Takato Kagawa                 |
| National Hospital Organization Himeji Medical Center      | Osamu Narumi                  |
| National Hospital Organization Kyushu Medical Center      | Akira Nakamizo, Shinji Nagata |
| National Hospital Organization Nagoya Medical Center      | Noriyuki Suzaki               |
| National Hospital Organization Okayama Medical Center     | Yoichiro Namba                |
| National Hospital Organization Osakaminami Medical Center | Tomonori Yamada               |
| National Hospital Organization Tochigi Medical Center     | Masayuki Ishihara             |
| National Hospital Organization Toyohashi Medical Center   | Hideki Sakai                  |
| National Hospital Organization Ureshino Medical Center    | Masayuki Miyazono             |
| National Hospital Organization, Iwakuni Clinical Center   | Kotaro Ogihara                |
| Nayoro City Hospital                                      | Naoki Tokumitsu               |
| Nho Sendai Medical Center                                 | Masayuki Ezura                |
| Nho Shinshu Ueda Medical Center                           | Keiichi Sakai                 |
| Nihon University Itabashi Hospital                        | Atsuo Yoshino                 |
| Niigata City General Hospital                             | Kenichi Morita, Akihiko Saito |
| Niigata Prefectural Central Hospital                      | Igarashi Michitoku            |
| Niigata Tokamachi Hospital                                | Mitsuo Kouno                  |
| Niigata University Medical and Dental Hospital            | Yukihiko Fujii, Osamu Onodera |
| Niigatanougekabyouin                                      | Kiyoshi Onda                  |
| Nishikobe Medical Center                                  | Naoya Takeda                  |

|                                             |                                  |
|---------------------------------------------|----------------------------------|
| Nishinomiya Kyoritsu Neurosurgical Hospital | Hiroji Miyake                    |
| Nishio Municipal Hospital                   | Toshio Yokoe                     |
| Nishitokyo Central General Hospital         | Tatsuya Nakamura                 |
| Nissan Tamagawa Hospital                    | Takayuki Kubodera                |
| Nitobe Memorial Nakano General Hospital     | Mitsuhiko Hokari                 |
| Noshiro Kosei Medical Center                | Yasunari Otawara                 |
| Noto General Hospital                       | Cheho Park                       |
| Nozaki Tokushukai Hospital                  | Hidemitu Nakagawa                |
| Obara Hospital                              | Souichi Obara                    |
| Obase Hospital                              | Haruki Takahashi                 |
| Obihiro Kosei General Hospital              | Masafumi Ohtaki                  |
| Odate Municipal General Hospital            | Atsuya Okubo                     |
| Ogaki Tokushukai Hospital                   | Katsuhiko Hayashi                |
| Ohnishi Neurological Center                 | Hideyuki Ohnishi, Yoshihiro Kuga |
| Ohta Nishinouchi Hospital                   | Masahisa Kawakami                |
| Oita Prefectural Hospital                   | Yu Takeda                        |
| Oitaken Koseiren Tsurumi Hospital           | Akihiko Kaga                     |
| Okaya City Hospital                         | Ryoichi Hayashi                  |
| Okayama City Hospital                       | Koji Tokunaga                    |
| Okayama Kyokuto Hospital                    | Hiroyuki Nakashima               |
| Okayama University Hospital                 | Isao Date                        |

|                                                                        |                                              |
|------------------------------------------------------------------------|----------------------------------------------|
| Okinawa Kyodo Hospital                                                 | Koji Idomari, Nobuyuki Kaneko                |
| Okinawa Prefectural Nanbu Medical Center and Children's Medical Center | Tomoaki Naganine                             |
| Okitama Public General Hospital                                        | Toshihiko Kinjo                              |
| Ome Municipal General Hospital                                         | Yoshiaki Takada, Osamu Tao                   |
| Omiyachiman Community Medical Center                                   | Masayuki Nakajima                            |
| Omori Red Cross Hospital                                               | Akira Isoshima                               |
| Omuta City Hospital                                                    | Terukazu Kuramoto                            |
| Onomichi Municipal Hospital                                            | Shigeru Daido                                |
| Osaka Medical College                                                  | Toshihiko Kuroiwa                            |
| Osaka National Hospital                                                | Kazuo Hashikawa                              |
| Osaka Neurological Institute                                           | Akatsuki Wakayama                            |
| Osaka Neurosurgical Hospital                                           | Naoki Hayashi                                |
| Osaka University Hospital                                              | Kouich Iwatsuki, Toshiki Yoshimine           |
| Osaki Citizen Hospital                                                 | Masahiro Yoshida                             |
| Otaru General Hospital                                                 | Yoshimasa Niiya                              |
| Otsu City Hospital                                                     | Motohiro Takayama                            |
| Otsu Red Cross Hospital                                                | Masaaki Saiki                                |
| Rakuwakaiotowa Hospital                                                | Kazuo Yamamoto                               |
| Research Institute For Brain and Blood Vessels-Akita                   | Junta Moroi, Taizen Nakase, Tatsuya Ishikawa |
| Saga-Ken Medical Centre Koseikan                                       | Shuji Sakata, Hiroshi Sugimori               |

|                                            |                                  |
|--------------------------------------------|----------------------------------|
| Saiseikai Futsukaichi Hospital             | Naoko Fujimura                   |
| Saiseikai Imabari Hospital                 | Osamu Nishizaki                  |
| Saiseikai Kumamoto Hospital                | Toru Nishi                       |
| Saiseikai Kurihashi Hospital               | Hiroshi Wanihuti                 |
| Saiseikai Kyouto Hospital                  | Nobukuni Murakami                |
| Saiseikai Matsusaka General Hospital       | Hiroto Murata                    |
| Saiseikai Nagasaki Hospital                | Wataru Haraguchi                 |
| Saiseikai Toyama Hospital                  | Yukio Horie                      |
| Saiseikai Yahata General Hospital          | Yuji Okamoto                     |
| Saiseikai Yokohamashi Tobu Hospital        | Makoto Inaba                     |
| Saiseikaiustunomiya Hospital               | Masashi Nakatsukasa              |
| Saitama City Hospital                      | Atsuhiro Kojima                  |
| Saitama Medical Center                     | Kyoichi Nomura                   |
| Saitama Red Cross Hosoiat                  | Toshie, Yamamoto Kenji Takahashi |
| Sakai City Medical Center                  | Yoshikazu Nakajima               |
| Saku Central Hospital Advanced Care Center | Takaaki Yoshida                  |
| Sanyudohospital                            | Yohei Kudoh                      |
| Sapporo Azabu Neurosurgical Hospital       | Toshitaka Nakamura               |
| Sapporo Medical University Hospital        | Nobuhiro Mikuni                  |
| Sapporo Shiroishi Memorial Hospital        | Akira Takahashi                  |
| Sapporoteishinkaihospital                  | Rokuya Tanikawa                  |

|                                                |                                    |
|------------------------------------------------|------------------------------------|
| Sasebo Chuo Hospital                           | Seisaburo Sakamoto                 |
| Secomedic Hospital                             | Seiichiro Hoshi                    |
| Seikeikai Hospital                             | Yoshinari Okumura                  |
| Seirei Memorial Hospital                       | Sinichi Okabe                      |
| Seirei Mikatahara General Hospital             | Haruhiko Sato                      |
| Sendai City Hospital                           | Hiroshi Karibe                     |
| Shakaiiryohoujinzaidanshinwakaiyachiyobyuin    | Takashi Inoue                      |
| Shikoku Medical Center For Children and Adults | Kazuyuki Kuwayama                  |
| Shimane Prefectural Central Hospital           | Tatsuya Mizoue                     |
| Shimizu Hospital                               | Takashi Yoshida                    |
| Shimonoseki City Hospital                      | Takaharu Nakamura                  |
| Shin Koga Hospital                             | Tsutomu Hitotsumatsu               |
| Shin-Oyama City Hospital                       | Tomoaki Kameda                     |
| Shingu Municipal Medical Center                | Mitsukazu Nakai, Hiroshi Ishiguchi |
| Shinonoi General Hosapital                     | Masanobu Hokama                    |
| Shinsapporo Neurosurgical Hospital             | Akinori Yamamura                   |
| Shinshu University Hospital                    | Kazuhiro Hongo                     |
| Shinsuma General Hospital                      | Takeshi Kondoh                     |
| Shintakeohospital                              | Makoto Ichinose                    |
| Shizuoka Children's Hospital                   | Yuzuru Tashiro                     |
| Shizuoka City Shizuoka Hospital                | Seiji Fukazawa                     |

|                                                                                    |                                  |
|------------------------------------------------------------------------------------|----------------------------------|
| Shonan Kamakura General Hospital                                                   | Takahisa Mori                    |
| Showa Inan General Hospital                                                        | Shinsuke Muraoka                 |
| Showa University Fujigaoka Hospital                                                | Tomoaki Terada                   |
| Shuuwa General Hospital                                                            | Tsuneo Shishido                  |
| Social Welfare Organization Saiseikai Imperial Gift Foundation Inc.                |                                  |
| Osaka Saiseikai Ibaraki Hospital                                                   | Yasunobu Gotou                   |
| Social Welfare Organization Saiseikai Imperial Gift Foundation Inc.Yamagata Saisei | Sunao Takemura                   |
| South Miyagi Medical Center                                                        | Hiroaki Arai                     |
| Southern Tohoku Hospital                                                           | Zenichiro Watanabe               |
| St. Marianna University School of Medicine                                         | Yuichiro Tanaka                  |
| St.Luke's International Hospital                                                   | Yasunari Niimi                   |
| Steel Memorial Yawata Hospital                                                     | Shinya Yamaguchi, Akira Nakamizo |
| Suiseikai Kajikawa Hospital                                                        | Shinichi Wakabayashi             |
| Suwa Central Hospital                                                              | Hiroki Sato                      |
| Suwa Red Cross Hospital                                                            | Yukinari Kakizawa                |
| Syakaiiryohouzin Kouseikai Takai Hospital                                          | Tetsuya Morimoto                 |
| Tachibana Medical Corporation Higashisumiyoshi Morimoto Hospital                   | Naofumi Isono                    |
| Tachikawa General Hospital                                                         | Hiroki Takano, Hiroshi Abe       |
| Takamatsu Municipal Hospital                                                       | Norihito Shirakawa               |
| Takamatsu Red Cross Hospital                                                       | Masahiro Kagawa                  |

|                                                |                                   |
|------------------------------------------------|-----------------------------------|
| Takarazuka City Hospital                       | Eiichiro Mabuchi                  |
| Takarazuka Daiichi Hospital                    | -                                 |
| Takatsuki General Hospital                     | Kazusige Maeno                    |
| Takeda General Hospital Organization           | Takayuki Koizumi                  |
| Takeda Hospital                                | Waro Taki                         |
| Takikawa Neurosurgical Hospital                | Yusuke Nakagaki                   |
| Tanushimaru Central Hospital                   | Yoshihisa Matumoto                |
| Teinekeijinkai Hospital                        | Katuyuki Asaoka                   |
| Tenri Hospital                                 | Yoshinori Akiyama                 |
| Tenshindo Hetsugi Hospital                     | Tadao Kawamura                    |
| Teraoka Memorial Hospital                      | Atumi Takenobu                    |
| The Veritas Hospital                           | Masayuki Yokota                   |
| Tobata Kyoritu Hospital                        | Taketoshi Tuji                    |
| Tohoku University Hospital                     | Teiji Tominaga                    |
| Tokai University Hachioji Hospital             | Shigeru Nogawa, Masami Shimoda    |
| Toki General Hospital                          | Sinji Noda                        |
| Tokushima Red Cross Hospital                   | Hajimu Miyake                     |
| Tokushima University Hospital                  | Shinji Nagahiro, Junichiro Satomi |
| Tokuyama Central Hospital                      | Kunihiko Harada                   |
| Tokyo Dental College Ichikawa General Hospital | Sadao Suga                        |
| Tokyo General Hospital                         | Shinichi Numazawa                 |



|                                                                    |                                      |
|--------------------------------------------------------------------|--------------------------------------|
| Tokyo Medical and Dental University                                | Taketoshi Maehara                    |
| Tokyo Medical University Hachioji Medical Center                   | Hiroyuki Jimbo, Jyunya Tsurukiri     |
| Tokyo Medical University Hospital                                  | Michihiro Kohno                      |
| Tokyo Metropolitan Hiroo Hospital                                  | Kensaku Yoshida                      |
| Tokyo Metropolitan Geriatric Hospital and Institute of Gerontology | Koji Matuoka                         |
| Tokyo Metropolitan Tama Medical Center                             | Takahiro Ota                         |
| Tokyo Saiseikai Central Hospital                                   | Haruhiko Hoshino                     |
| Tokyo Teisin Hospital                                              | Makoto Noguchi                       |
| Tokyo Women's Medical University                                   | Takakazu Kawamata                    |
| Tokyo Yamate Medical Center                                        | Yasuaki Takeda                       |
| Tomakomaihigashi Hospital                                          | Youichi Hashimoto                    |
| Tomei Atsugi Hopital                                               | Keiichirou Onitsuka                  |
| Tominaga Hospital                                                  | Masahiko Kitano                      |
| Tomishiro Central Hospital                                         | Jae-Hyun Son                         |
| Tottori Municipal Hospital                                         | Keiichi Akatsuka                     |
| Tottori University                                                 | Masamichi Kurosaki, Takashi Watanabe |
| Toyama City Hospital                                               | Miyamori Tadao                       |
| Toyama Prefectural Central Hospital                                | Hiroaki Hondo                        |
| Toyama Red Cross Hospital                                          | Kazumasa Yamatani, Kotaro Tsumura    |
| Toyama University Hospital                                         | Satoshi Kuroda                       |
| Toyohashi Municipal Hospital                                       | Hirofumi Oyama                       |

|                                                          |                                                   |
|----------------------------------------------------------|---------------------------------------------------|
| Toyokawa City Hospital                                   | Takayuki Watanabe                                 |
| Toyooka Hospital                                         | Kazuhiro Tanaka                                   |
| Tsuchiura Kyodo General Hospital                         | Shinji Yamamoto                                   |
| Tsukuba Medical Center Hospital                          | Kazuya Uemura                                     |
| Tsuruoka Municipal Shonai Hospital                       | Hiroshi Maruya, Kazuhiko Sato                     |
| Tsutiura Kyodo Hospital Namegata District Medical Center | Hitoshi Tabata                                    |
| Tsuyama Chuo Hospital                                    | Hideyuki Yoshida                                  |
| Tyuubu Rousai Hospital                                   | Noriaki Matubara                                  |
| Ube Kohsan Industries Hospital                           | Takafumi Nishizaki                                |
| Uki General Hospital                                     | Hiroshi Egami                                     |
| University of Fukui Hospital                             | Osamu Yamamura                                    |
| University of Occupational and Environmental Health      | Junkoh Yamamoto                                   |
| University of The Ryukyus Hospital                       | Shogo Ishiuchi                                    |
|                                                          | Yuji Matsumaru, Akira Matsumura, Tetsuya Yamamoto |
| University of Tsukuba Hospital                           |                                                   |
| University of Yamanashi                                  | Hiroyuki Kinouchi                                 |
| Urasoe General Hospital                                  | Susumu Mekaru                                     |
| Ushioda General Hospital                                 | Hitoshi Ozawa                                     |
| Uwajima City Hospital                                    | Kiichiro Zenke                                    |
| Wakayama Medical University Hospital                     | Naoyuki Nakao                                     |
| Wakayama Rosai Hospital                                  | Toshikazu Kuwata                                  |

|                                            |                                     |
|--------------------------------------------|-------------------------------------|
| Wakayama-Seikyo Hospital                   | Teruyuki Habu                       |
| Yaizu City Hospital                        | Seiya Takehara                      |
| Yamagata City Hospital Saiseikan           | Rei Kondo                           |
| Yamagata Prefectural Central Hospital      | Takashi Kumagai                     |
| Yamagata Prefectural Shinjo Hospital       | Keiten So                           |
| Yamagata University Hospital               | Yukihiko Sonoda                     |
| Yamaguchi Prefectural Grand Medical Center | Manabu Urakawa                      |
| Yamaguchi Red Cross Hospital               | Yasuhiro Hamada                     |
| Yamaguchi University Hospital              | Michiyasu Suzuki                    |
| Yamanashi Prefectural Central Hospital     | Shin Nakano, Hidehito Koizumi       |
| Yamanashi Redcross Hospital                | Hiroshi Ozawa                       |
| Yamanashikouseibyoin                       | Mikito Uchida                       |
| Yamato Municipal Hospital                  | Masaru Yamada                       |
| Yao Tokushukai General Hospital            | Takashi Turuno                      |
| Yatsuo General Hospital                    | Ryouichi Masuda                     |
| Yawata Medical Center                      | Makoto Kimura                       |
| Yayoigaoka Kage Hospital                   | Shin-Ichiro Ishihara                |
| Yodogawa Christian Hospital                | Masashi Morikawa                    |
| Yokohama City Minato Red Cross Hospital    | Yasunori Takemoto, Hiroaki Tanaka   |
| Yokohama City University Hospital          | Hidetoshi Murata, Nobutaka Kawahara |
| Yokohama City University Medical Center    | Katsumi Sakata                      |

Yokohamasinmidorihospital

Yonezawa City Hospital

Yoshida Hospital

Yuaikaihospital

Endo Sumio

Tooru Sasaki

Yasuhisa Yoshida

Yoshihumi Teramoto
